# Supplementary material for: Sequential nucleophilic aromatic substitutions on cyanuric chloride: synthesis of BODIPY derivatives and mechanistic insights
Source: Royal Society of Chemistry journal article supplement (doi:10.1039/d4ob00683f), 2024-01-01
Supplement: d4ob00683f1.pdf [file d4ob00683f1.pdf]

# Electronic Supplementary Information

## Sequential nucleophilic aromatic substitutions on cyanuric chloride: synthesis of BODIPY derivatives and mechanistic insights.

Bruno da Silva Marques<sup>a</sup>, Karine Nascimento de Andrade<sup>a</sup>, Bárbara Pereira Peixoto<sup>a</sup>, Fernando Martins dos Santos Junior<sup>a</sup>, Leandro Ferreira Pedrosa<sup>a,b</sup>, Rodolfo Goetze Fiorot<sup>a</sup>, Marcos Costa de Souza<sup>\*a</sup>

<sup>a</sup>*Departamento de Química Orgânica, Instituto de Química, Universidade Federal Fluminense, 24020-141, Niterói, RJ, Brazil. E-mail: marcoscs@id.uff.br.*

<sup>b</sup>*Departamento de Química, Instituto de Ciências Exatas, Universidade Federal Fluminense, 27213-145, Volta Redonda, RJ, Brazil.*

### CONTENTS:

|                                                                              |     |
|------------------------------------------------------------------------------|-----|
| <b>1. NMR SPECTRUM OF ALL ISOLATED COMPOUNDS</b> .....                       | S2  |
| <b>2. THEORETICAL EVALUATIONS</b> .....                                      | S29 |
| <b>2.1</b> Rotational isomerism .....                                        | S29 |
| <b>2.2</b> Conformational analysis .....                                     | S30 |
| <b>2.3</b> Nucleophilic substitutions at cyanuric chloride.....              | S31 |
| <b>2.4</b> Cartesian coordinate matrices of relevant stationary points ..... | S34 |

# 1. NMR SPECTRUM OF ALL ISOLATED COMPOUNDS

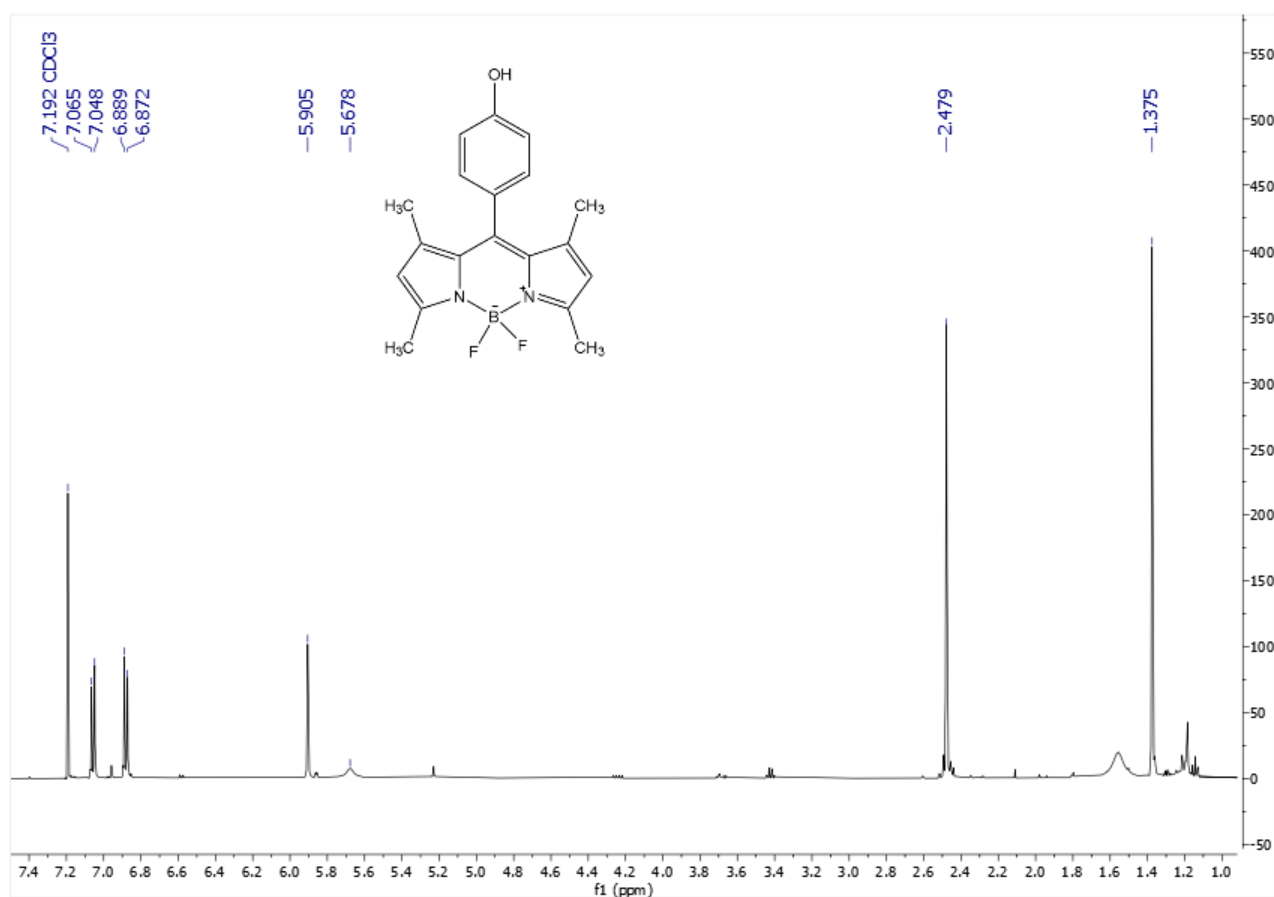

Figure S1 –  $^1\text{H}$  NMR spectrum (500 MHz) of (I) in  $\text{CDCl}_3$ .

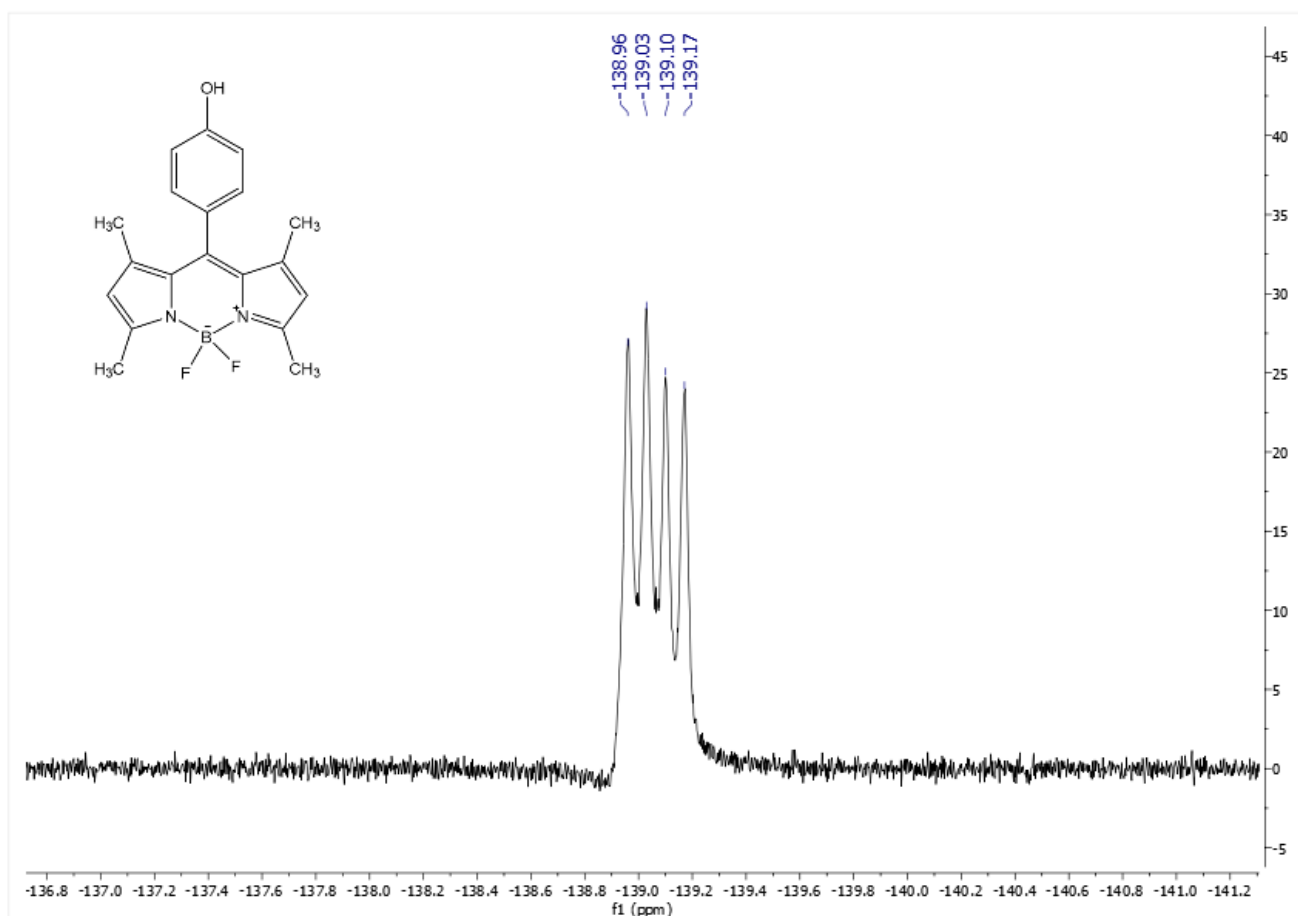

Figure S2 –  $^{19}\text{F}$  NMR spectrum (470 MHz) of (I) in  $\text{CDCl}_3$ .

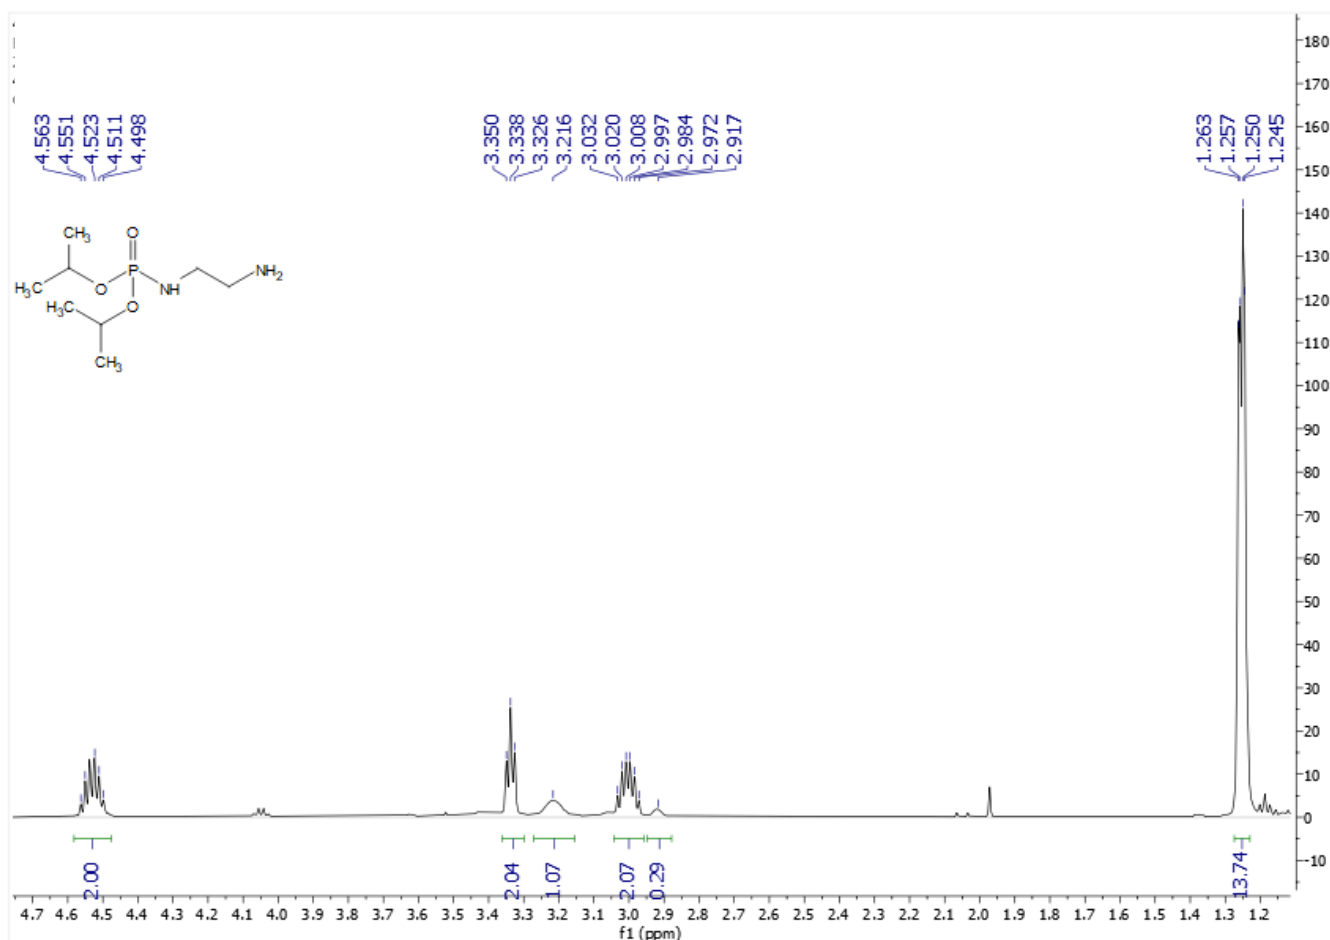

Figure S3 – <sup>1</sup>H NMR spectrum (500 MHz) of **IIa** in CDCl<sub>3</sub>.

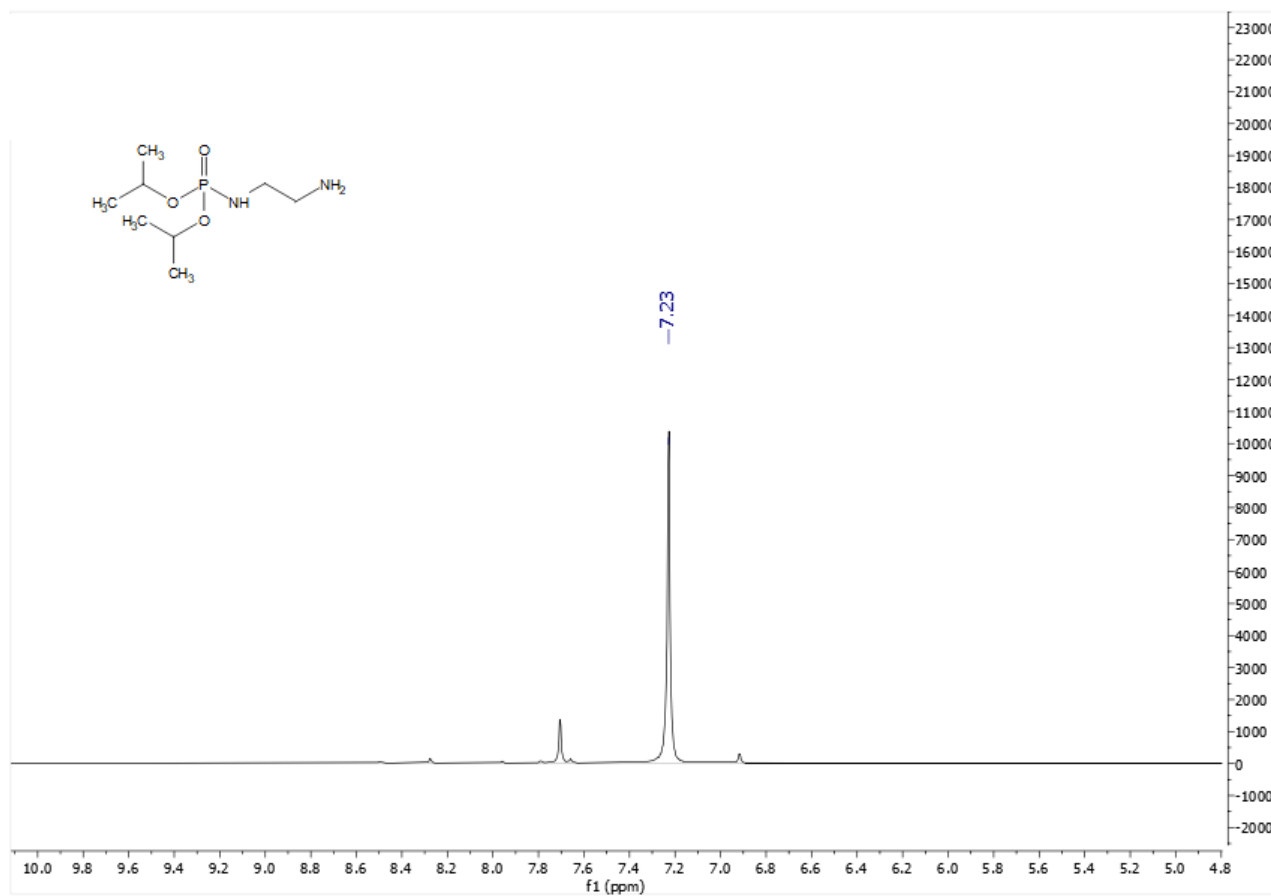

Figure S4 – <sup>31</sup>P NMR spectrum (202 MHz) of **IIa** in CDCl<sub>3</sub>.

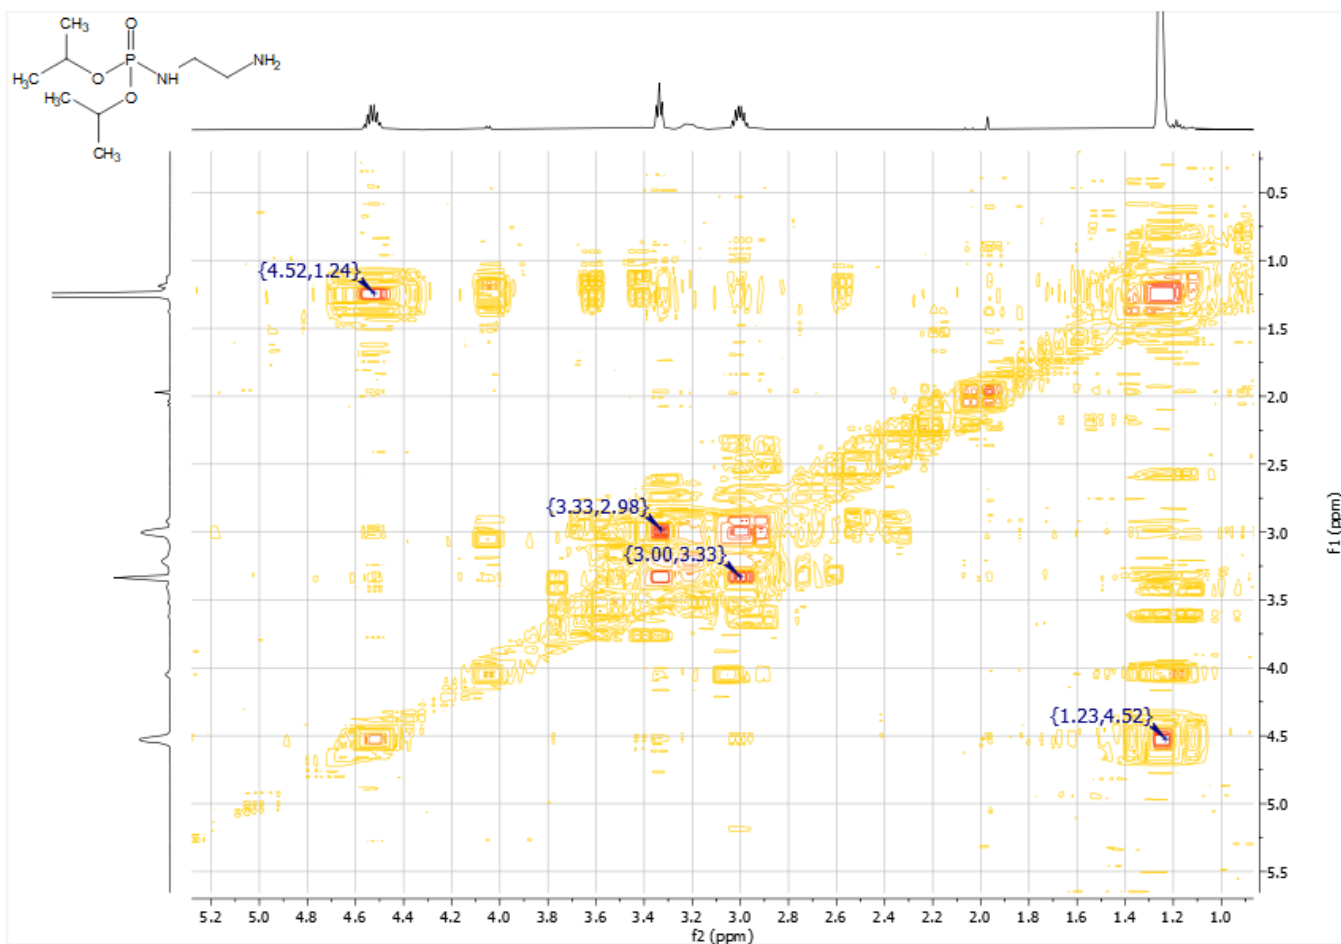

Figure S5 –  $^1\text{H}\times^1\text{H}$ -COSY spectrum of IIa.

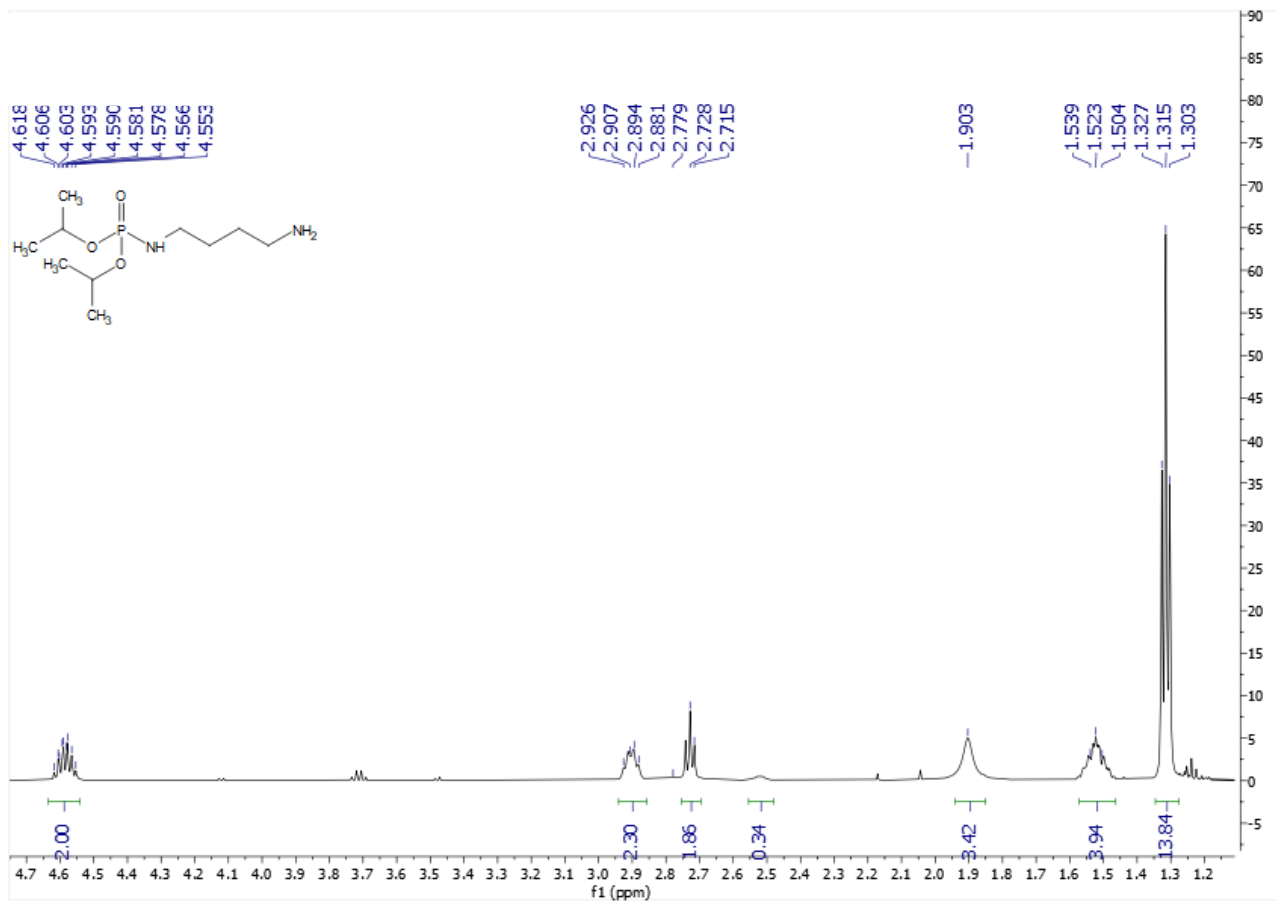

Figure S6 –  $^1\text{H}$  NMR spectrum (500 MHz) of IIb in  $\text{CDCl}_3$ .

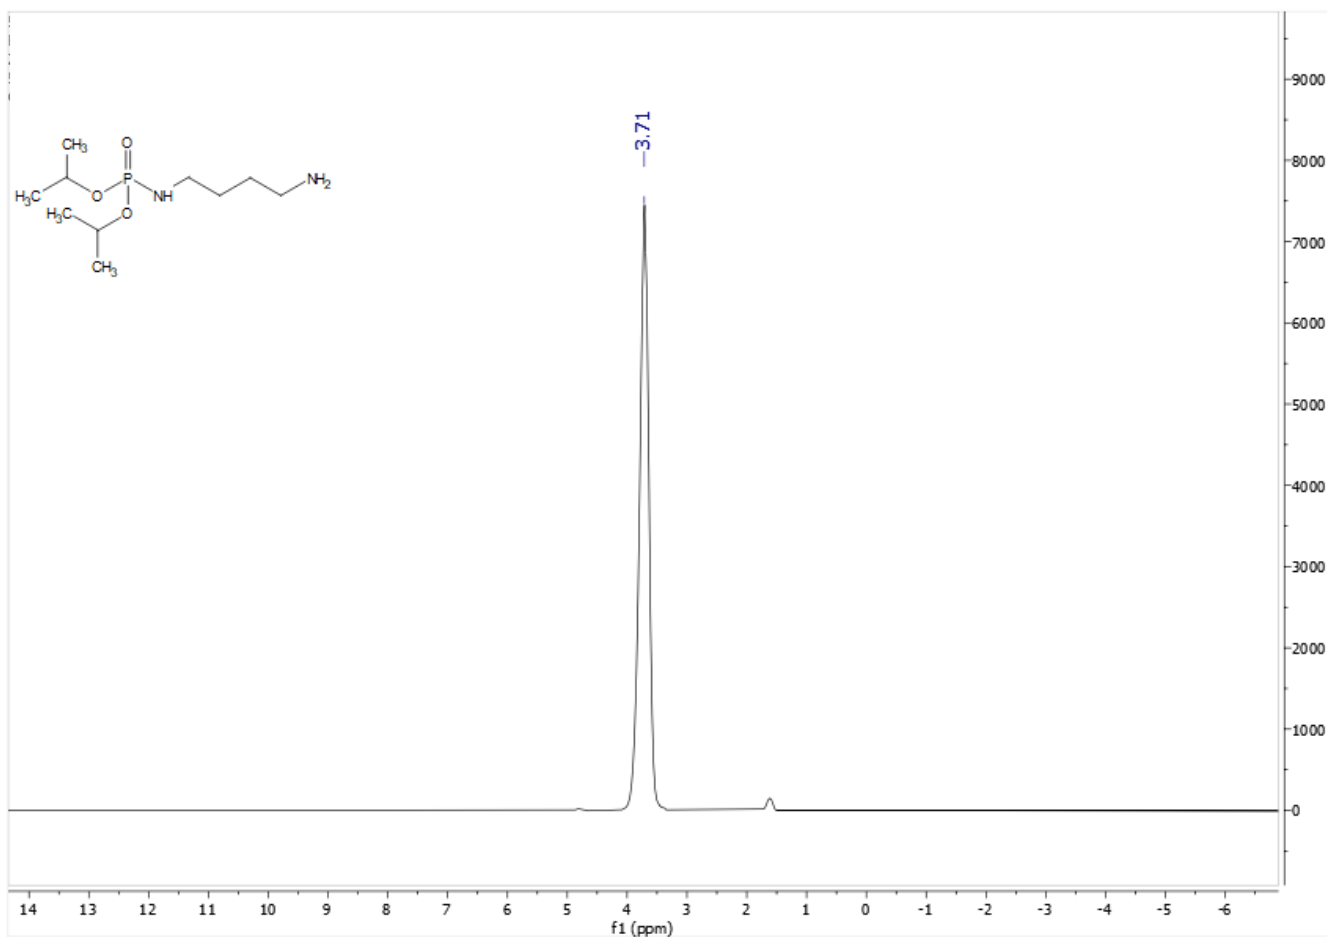

**Figure S7** –  $^{31}\text{P}$  NMR spectrum (202 MHz) of **IIb** in  $\text{CDCl}_3$ .

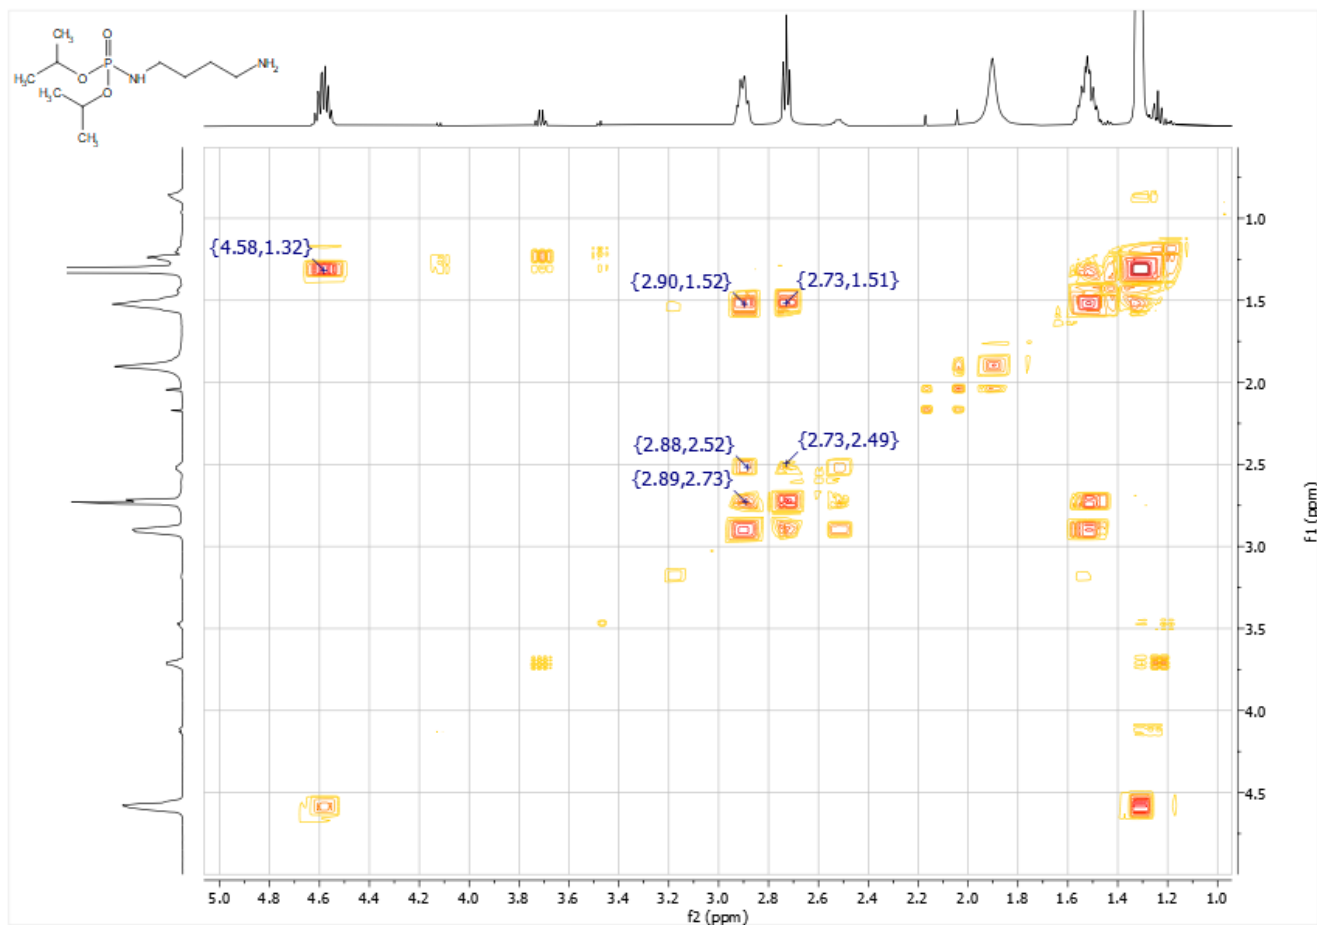

**Figure S8** –  $^1\text{Hx}^1\text{H}$ -COSY spectrum of **IIb**.

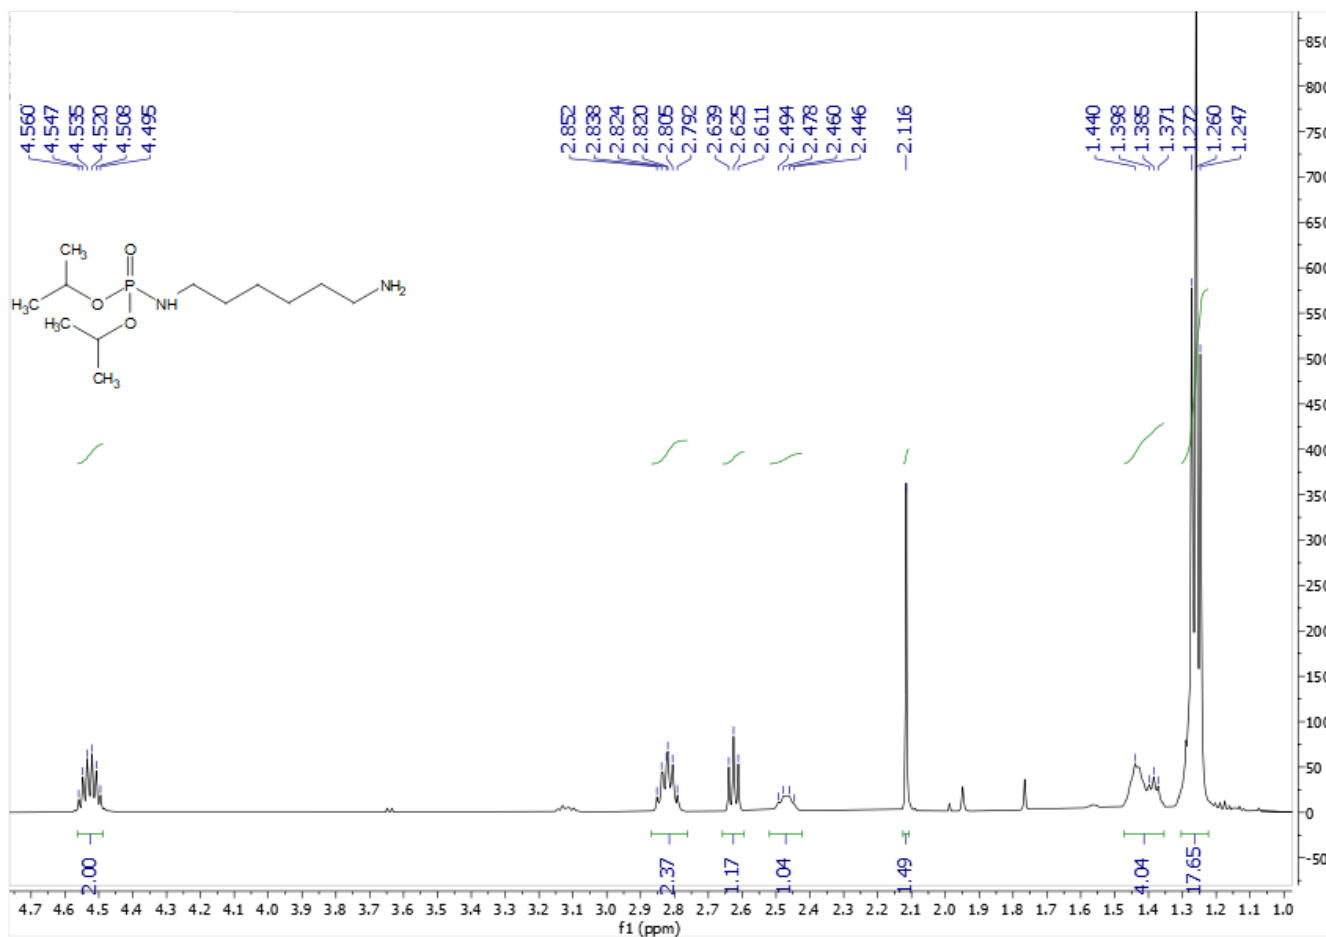

Figure S9 – <sup>1</sup>H NMR spectrum (500 MHz) of **IIc** in CDCl<sub>3</sub>.

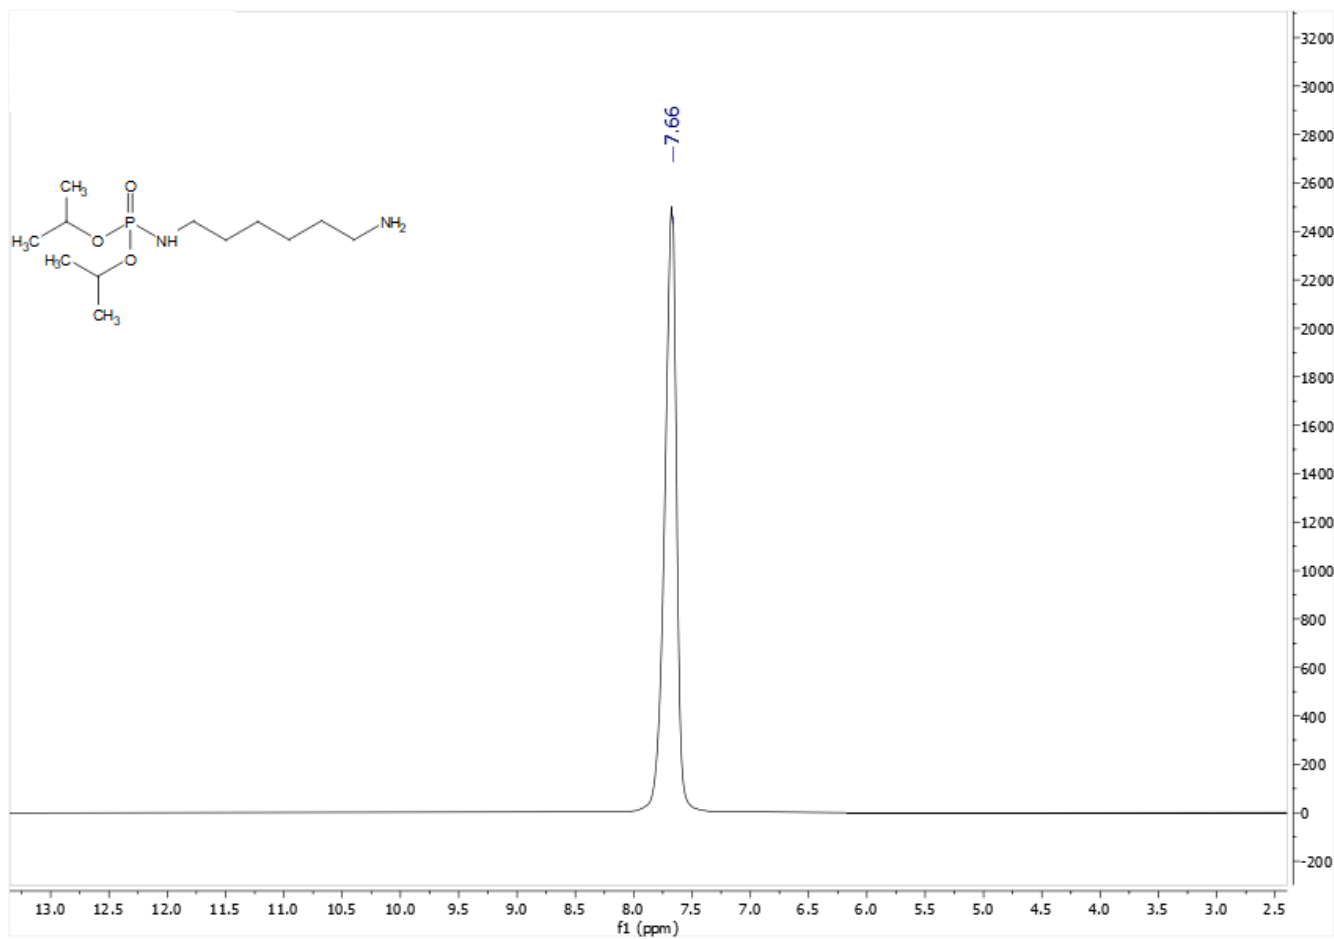

Figure S10 – <sup>31</sup>P NMR spectrum (202 MHz) of **IIc** in CDCl<sub>3</sub>.

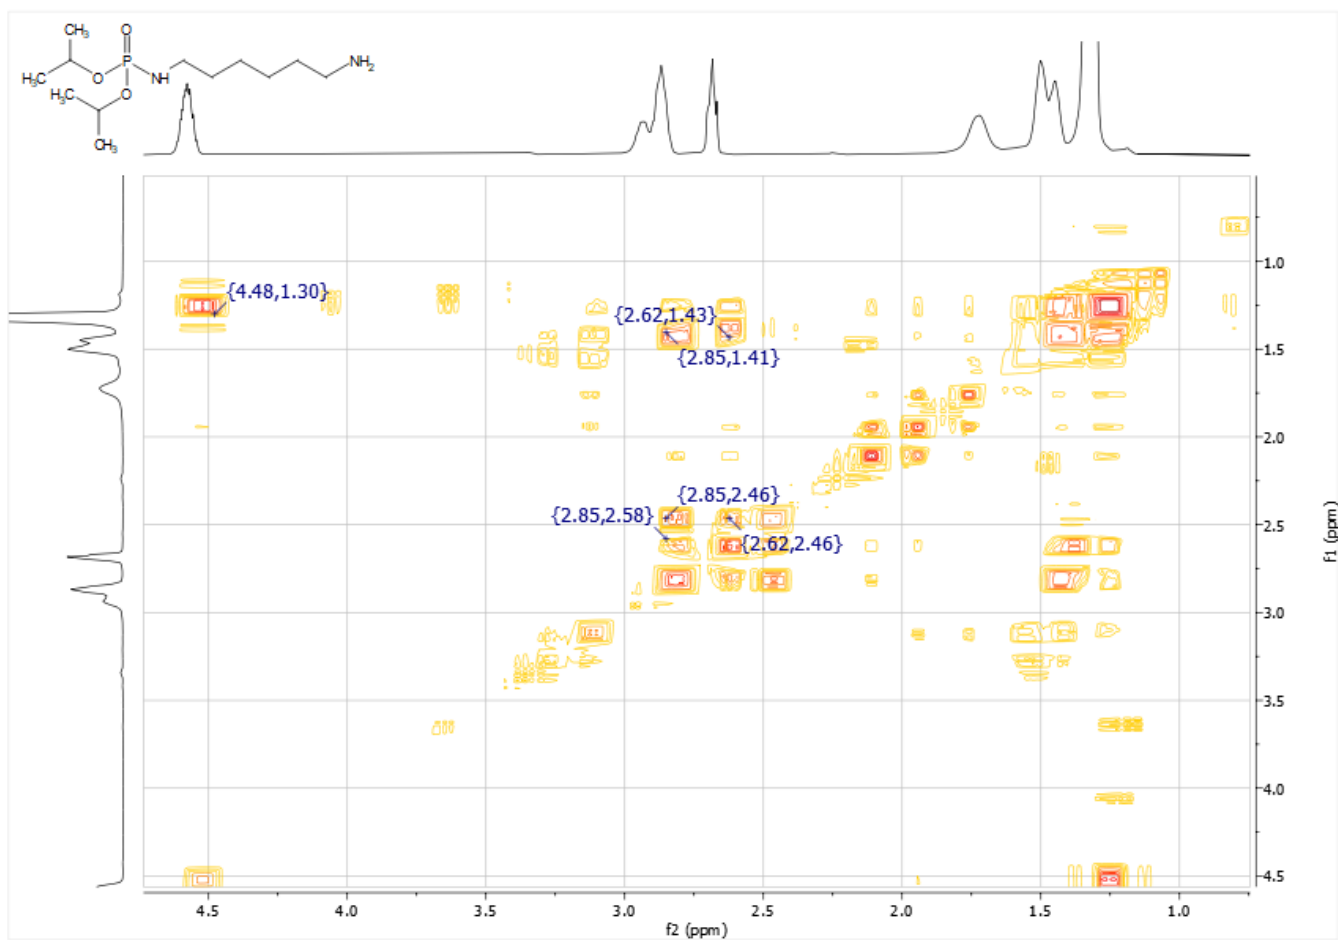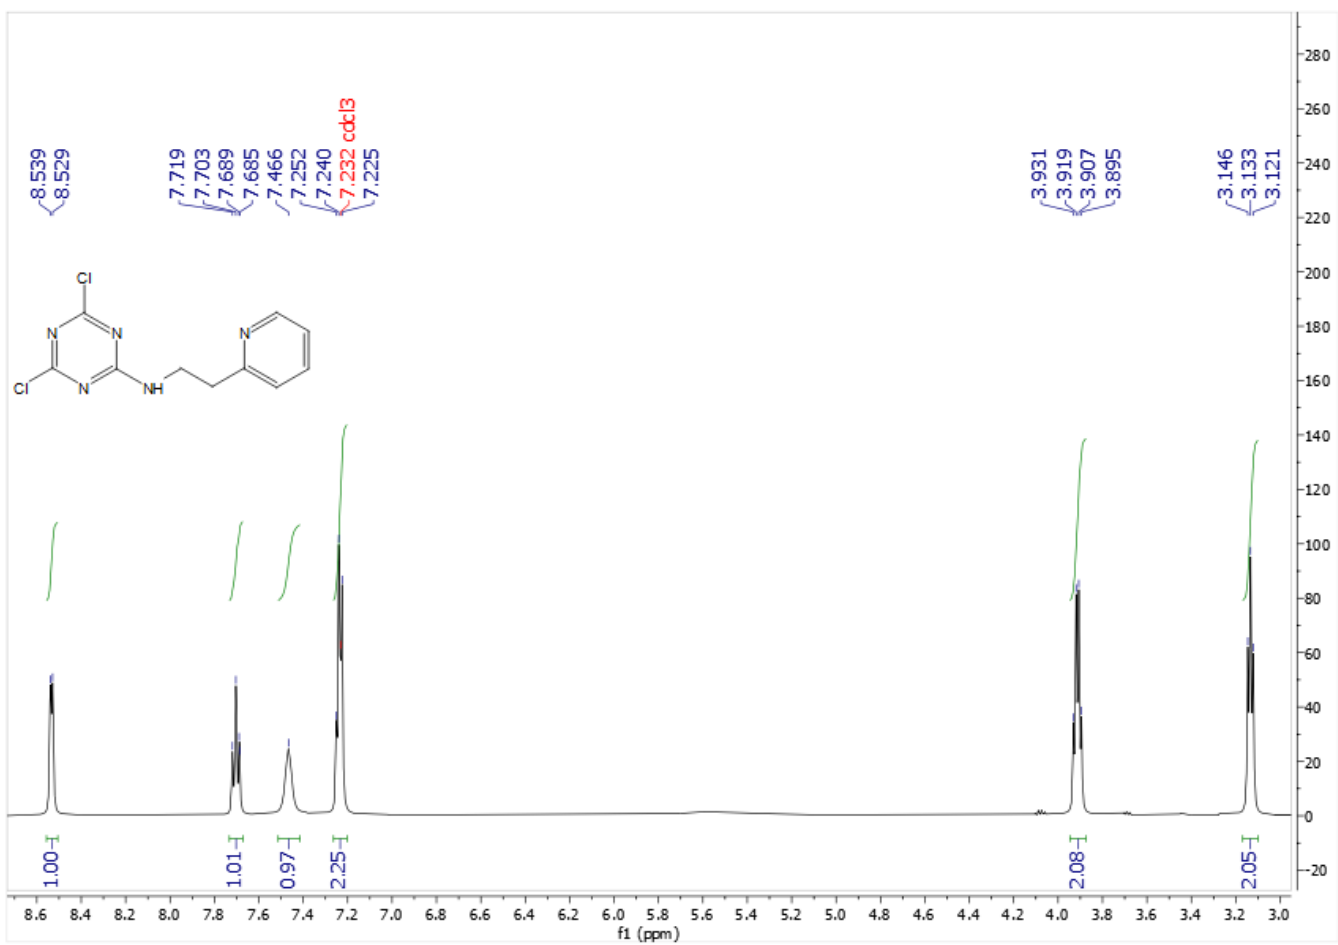

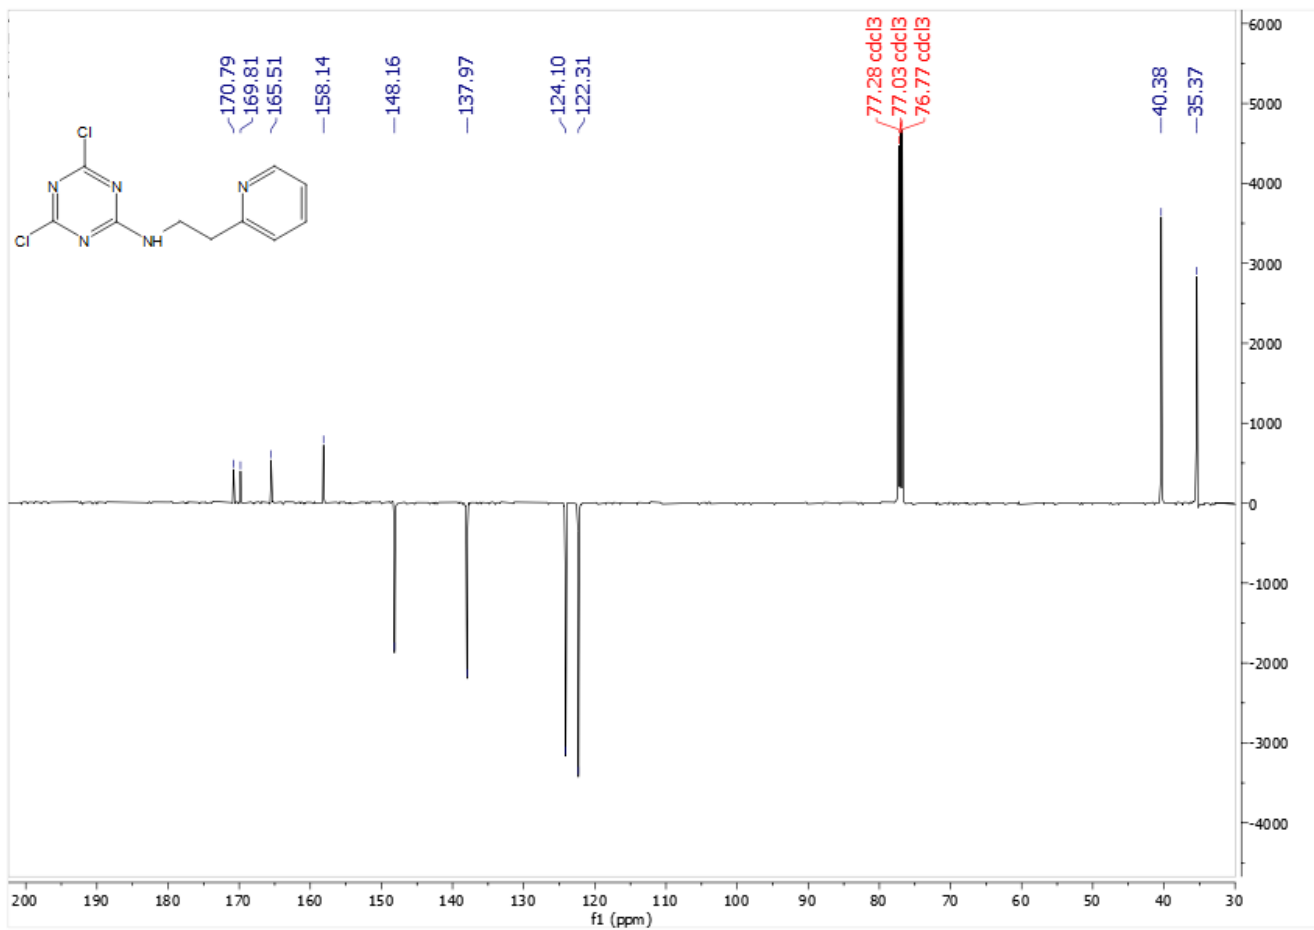

Figure S13 –  $^{13}\text{C}$ -APT NMR spectrum (125 MHz) of 1 in  $\text{CDCl}_3$ .

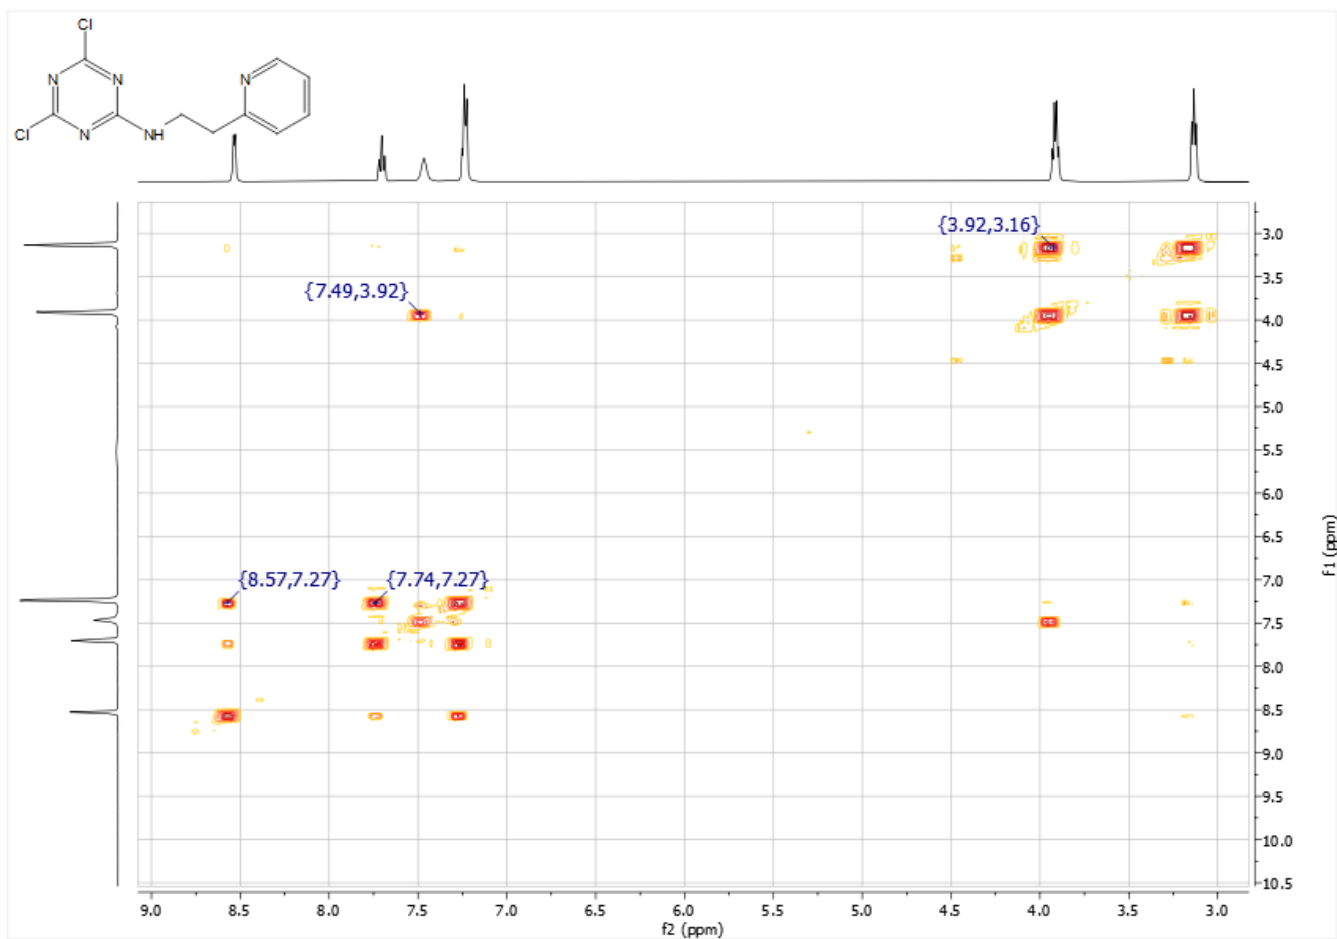

Figure S14 –  $^1\text{Hx}^1\text{H}$ -COSY spectrum of 1.



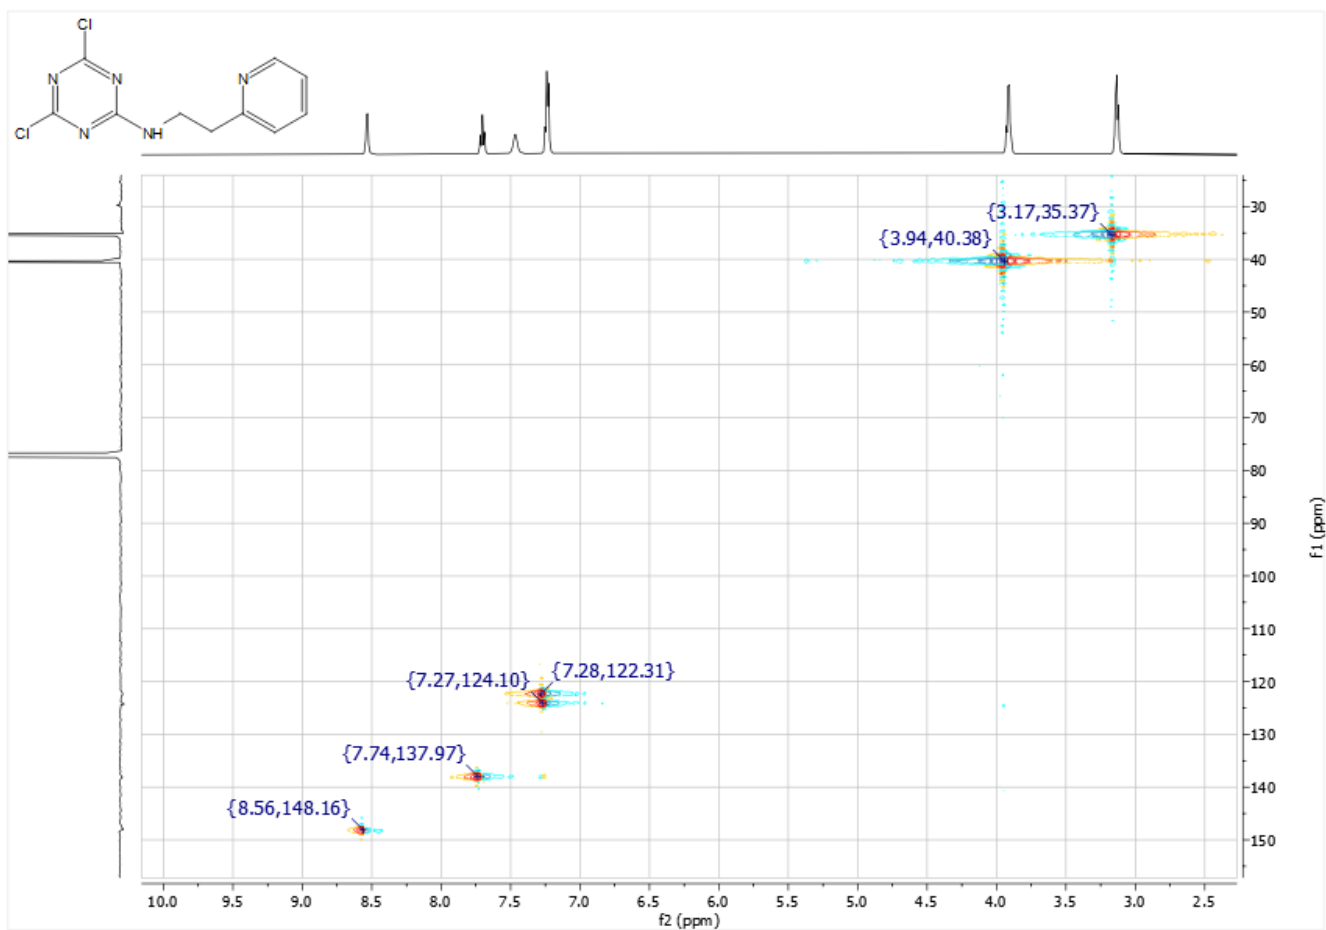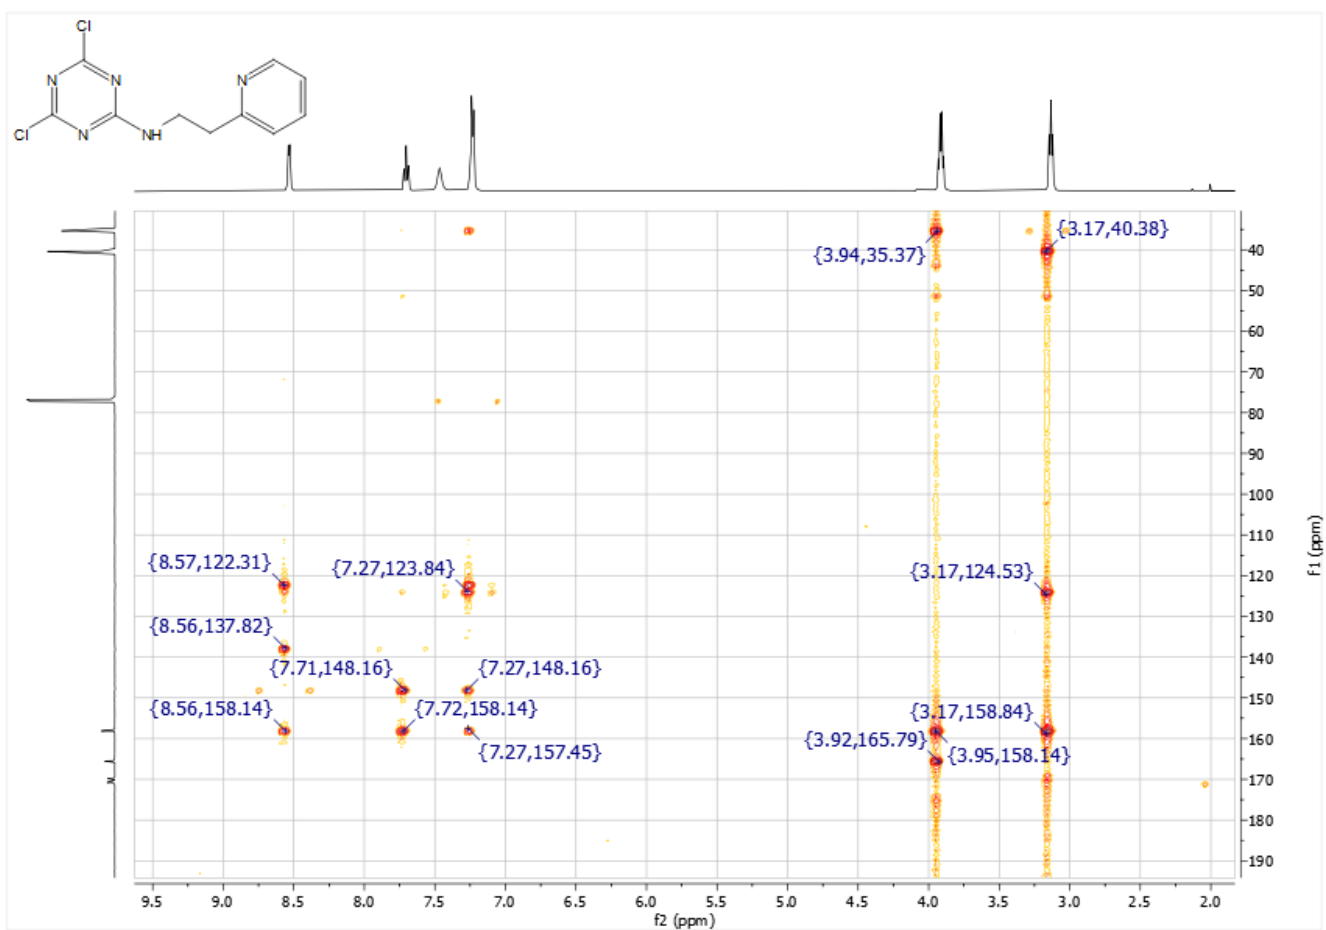

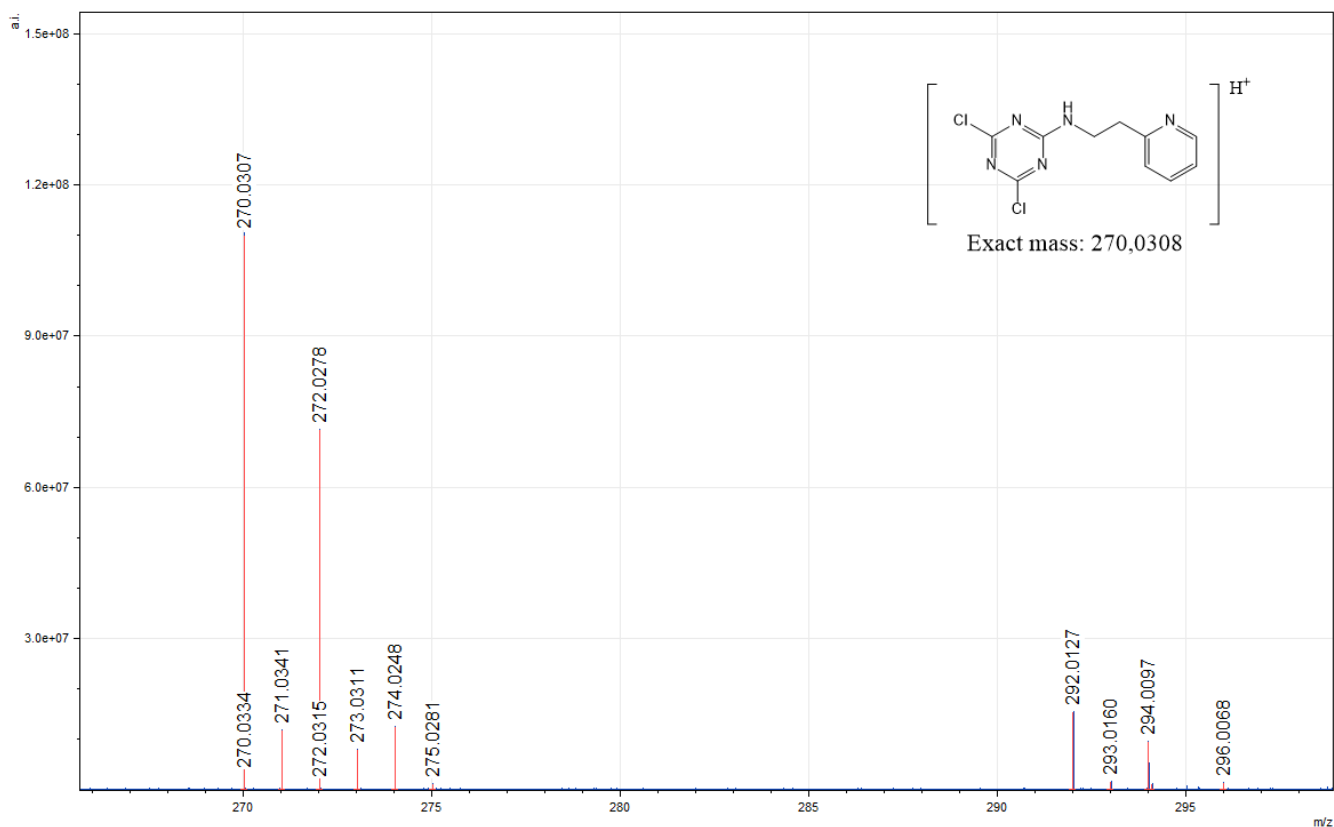

Figure S17 – HRMS spectrum of **1**.

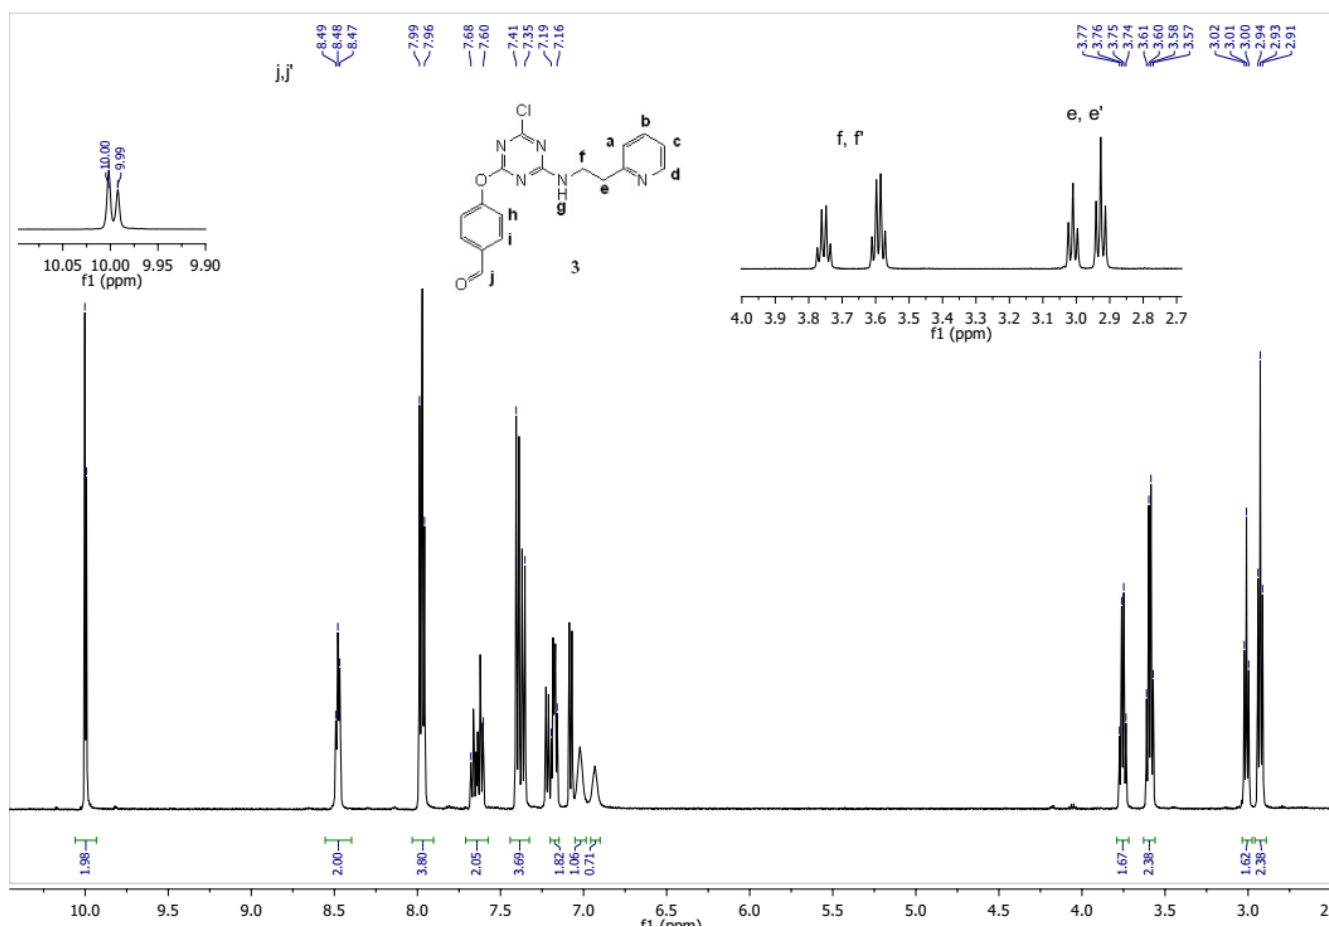

Figure S18 –  $^1\text{H}$  NMR spectrum (500 MHz) of **3** in  $\text{CD}_3\text{CN}$ .

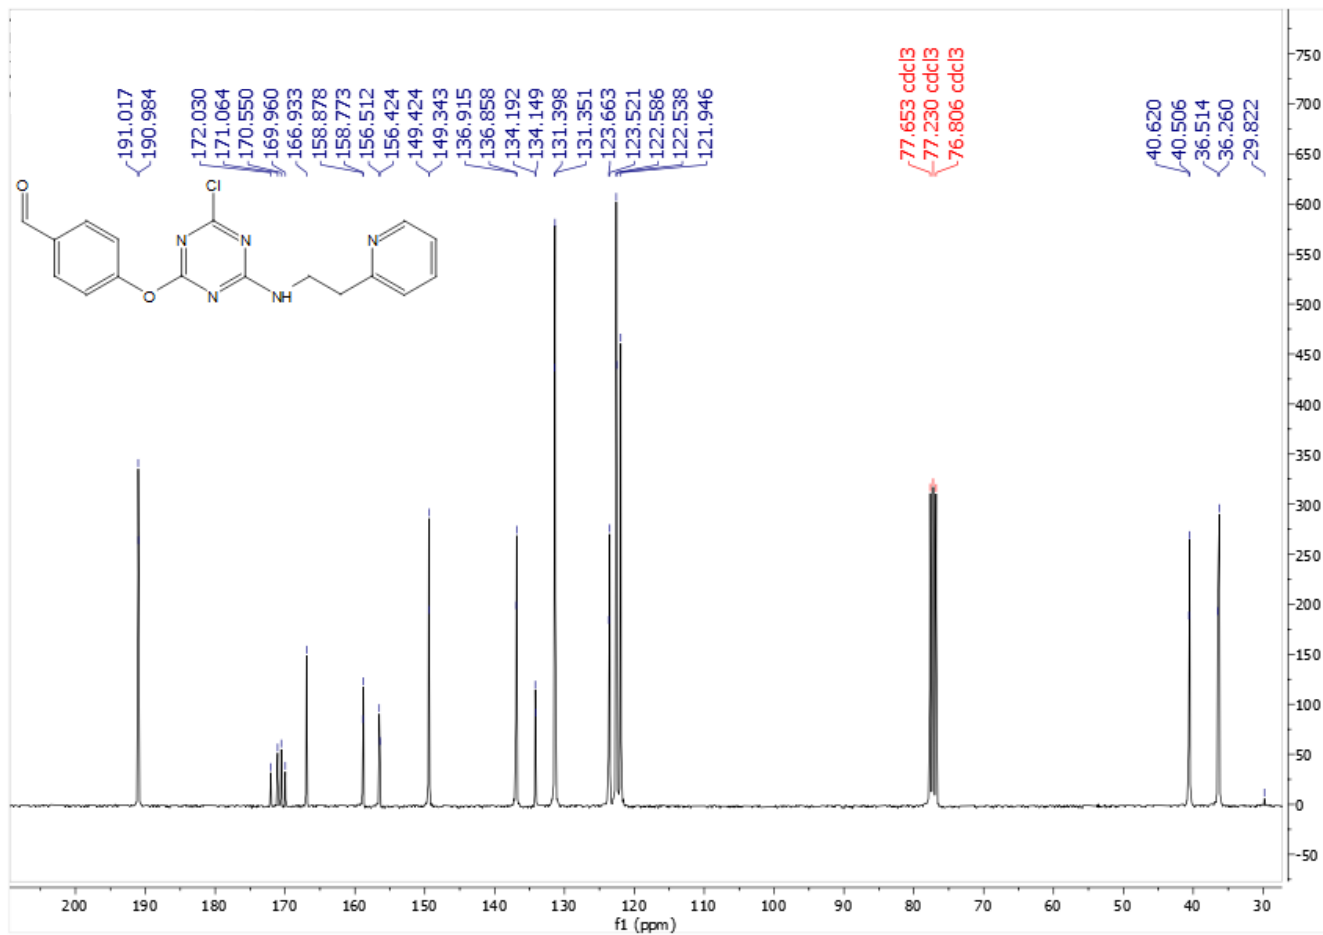

Figure S19 –  $^{13}\text{C}$  NMR spectrum (75 MHz) of 3 in  $\text{CDCl}_3$ .

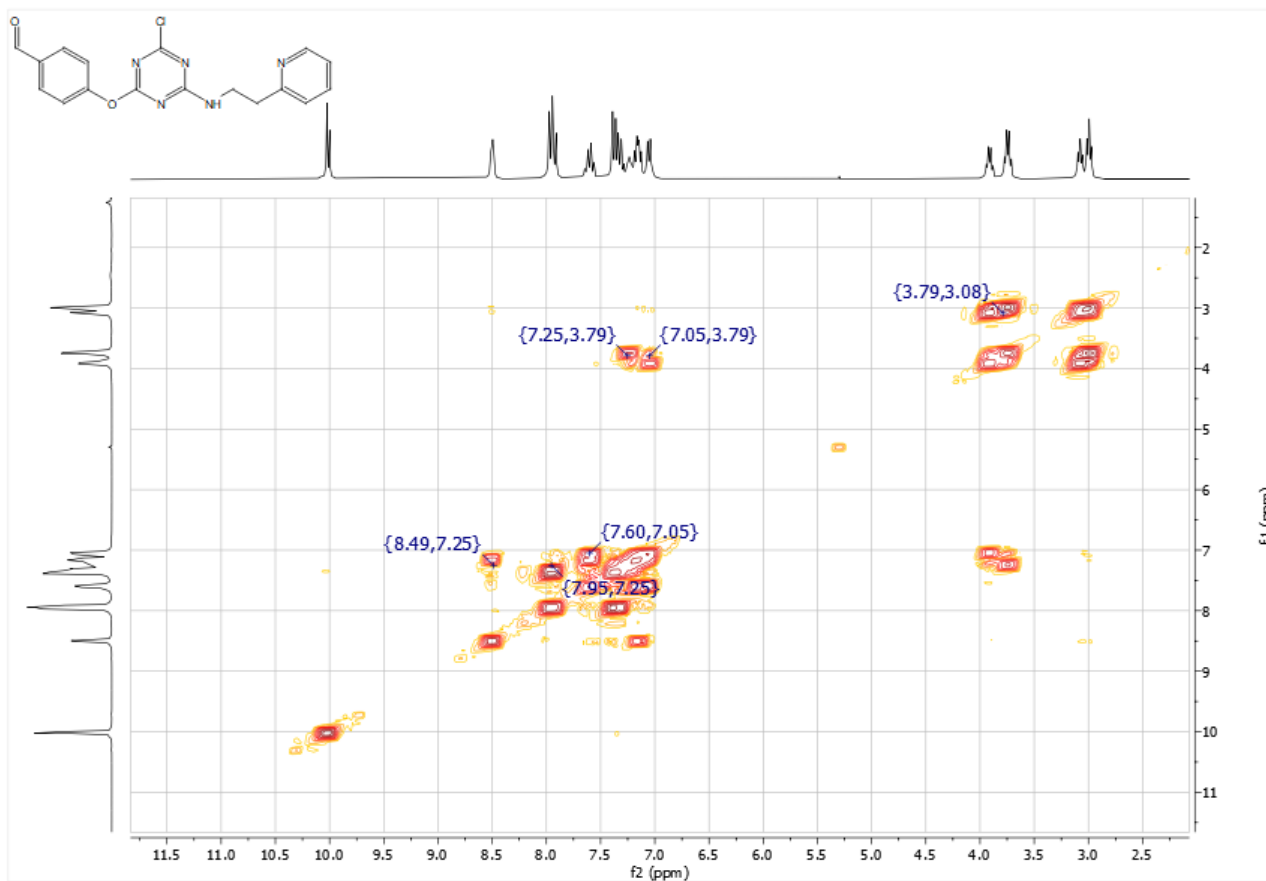

Figure S20 –  $^1\text{Hx}^1\text{H}$ -COSY spectrum of 3.

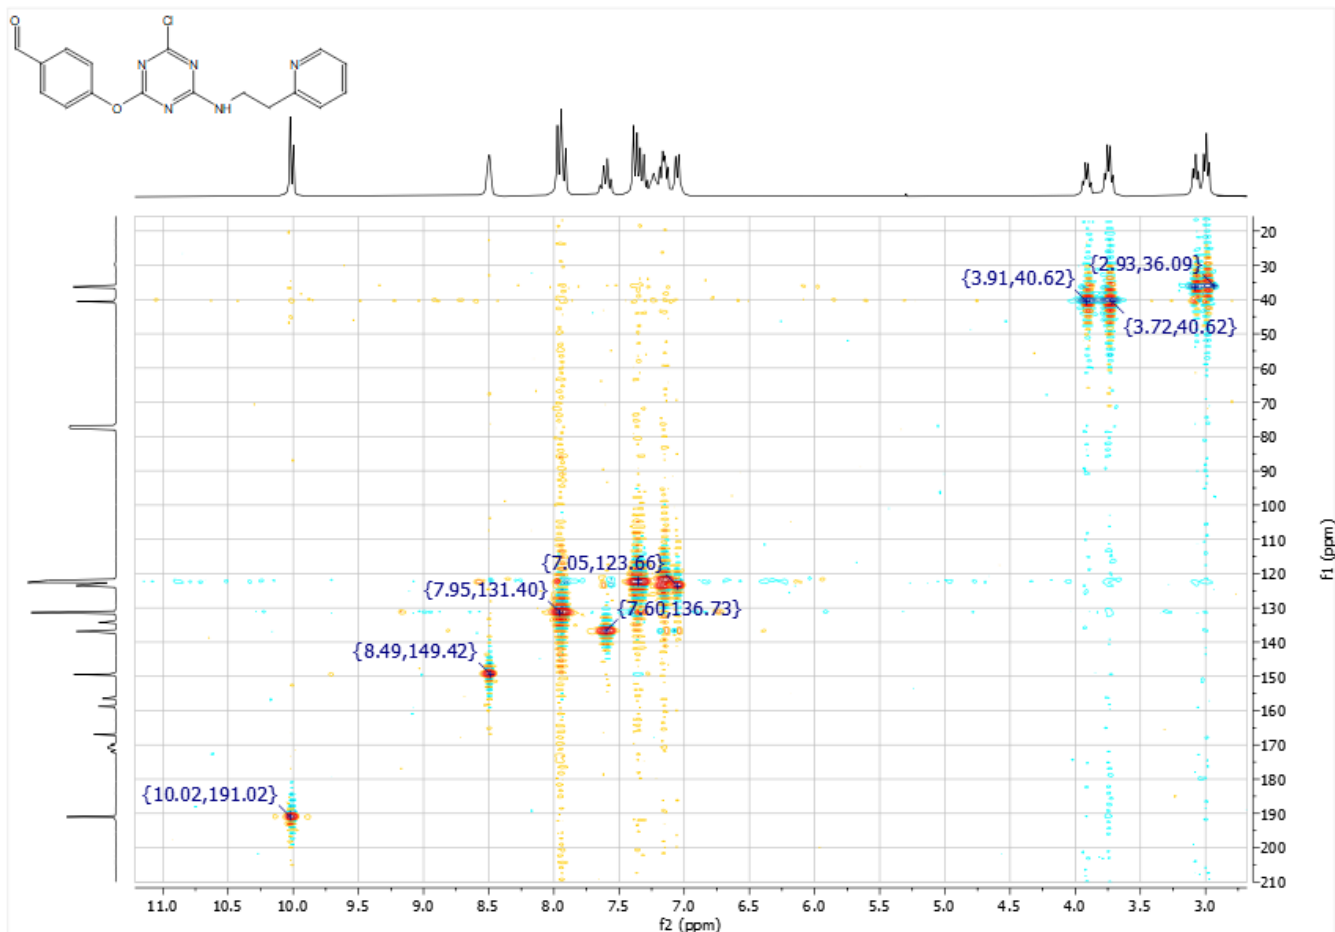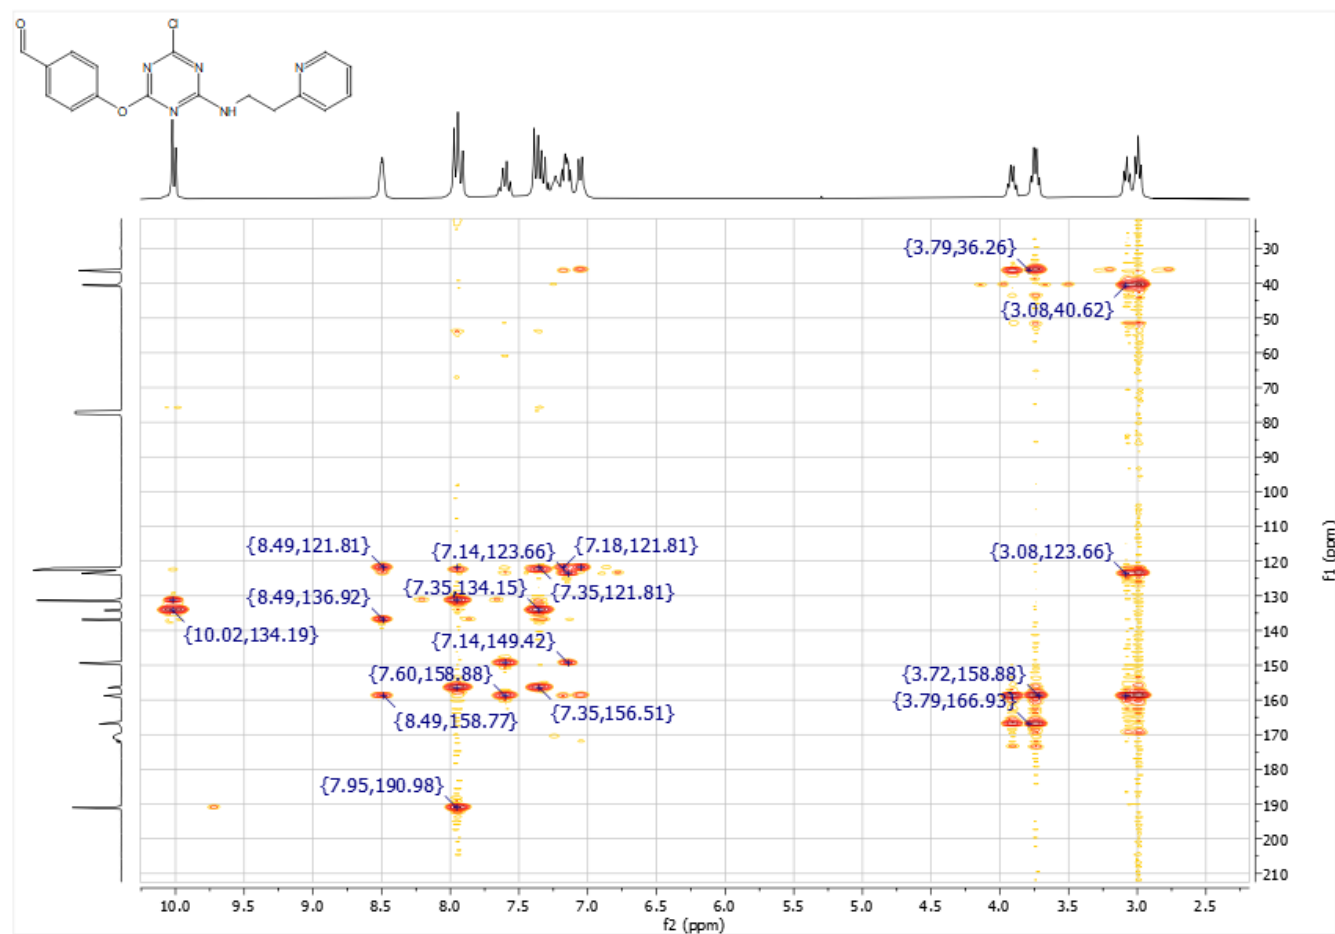

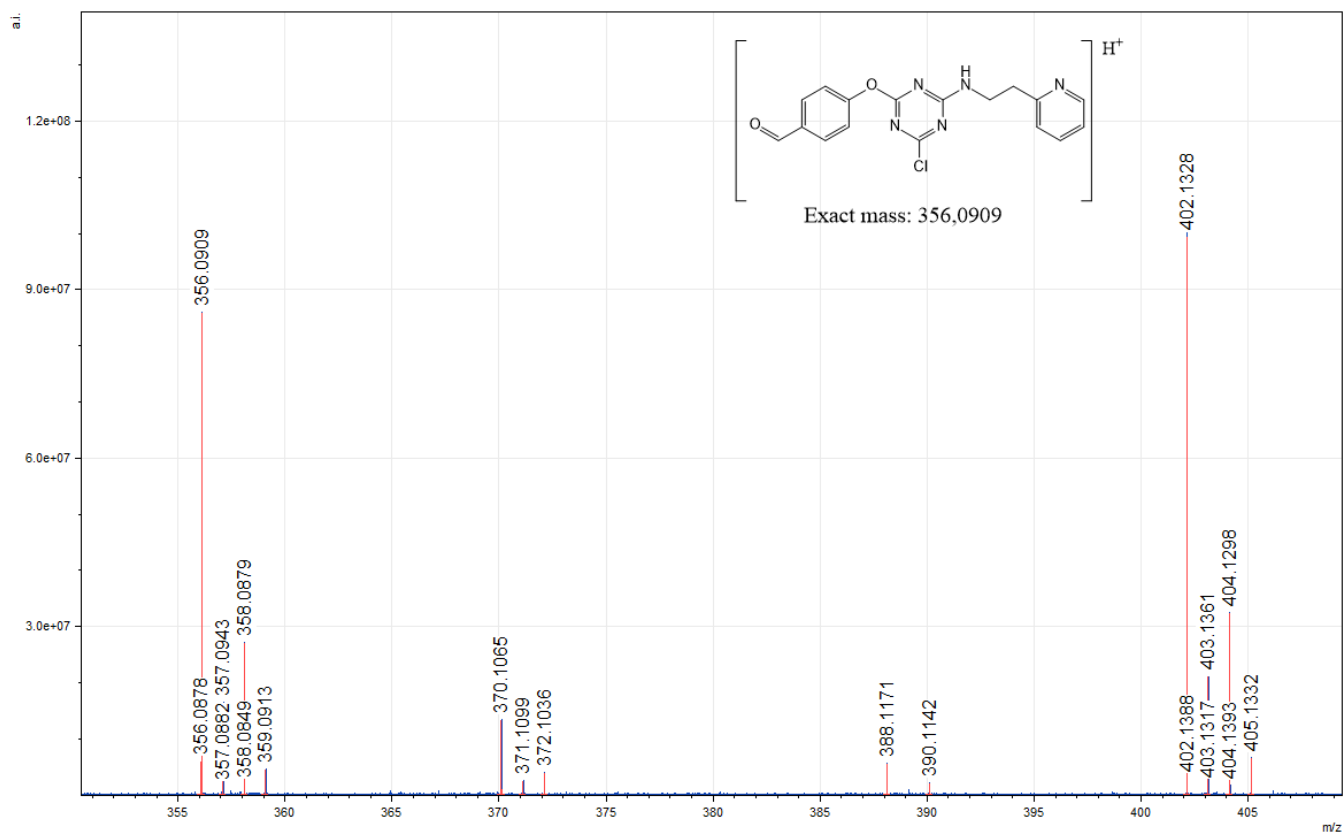

Figure S23 – HRMS spectrum of 3.

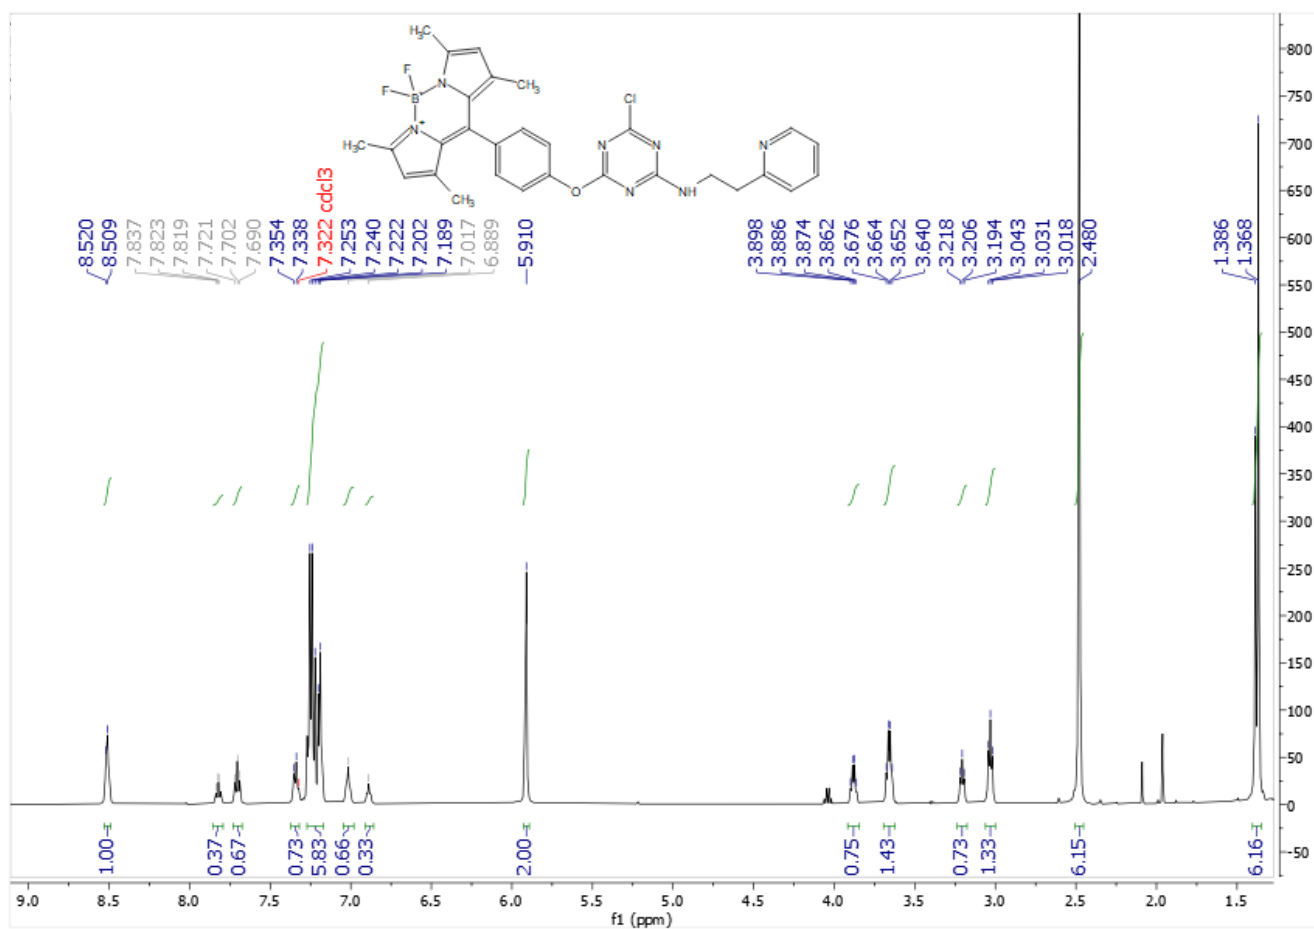

Figure S24 –  $^1\text{H}$  NMR spectrum (500 MHz) of 4 in  $\text{CDCl}_3$ .

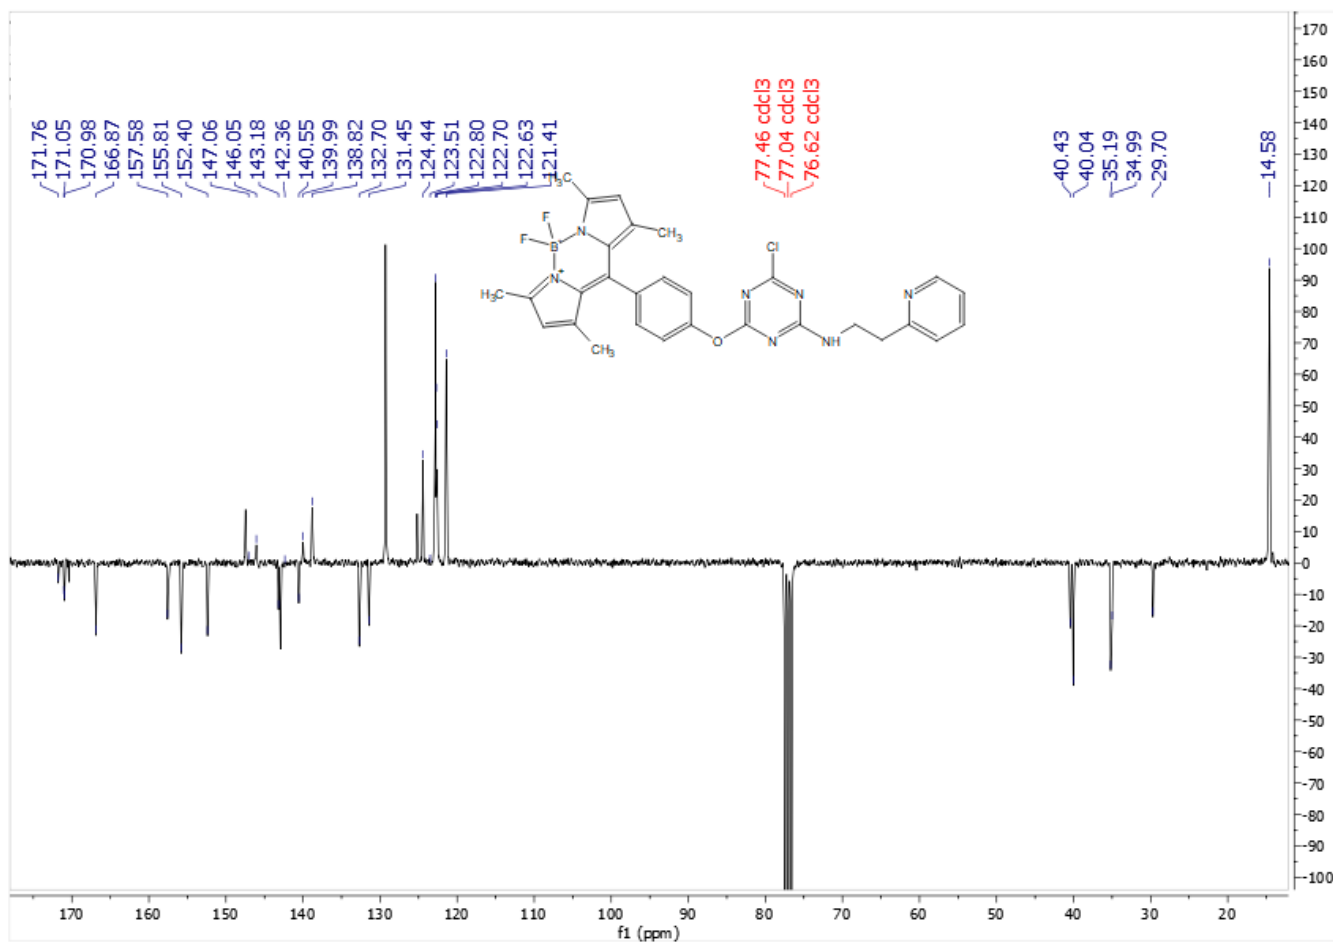

Figure S25 – <sup>13</sup>C-APT NMR spectrum (125 MHz) of 4 in CDCl<sub>3</sub>.

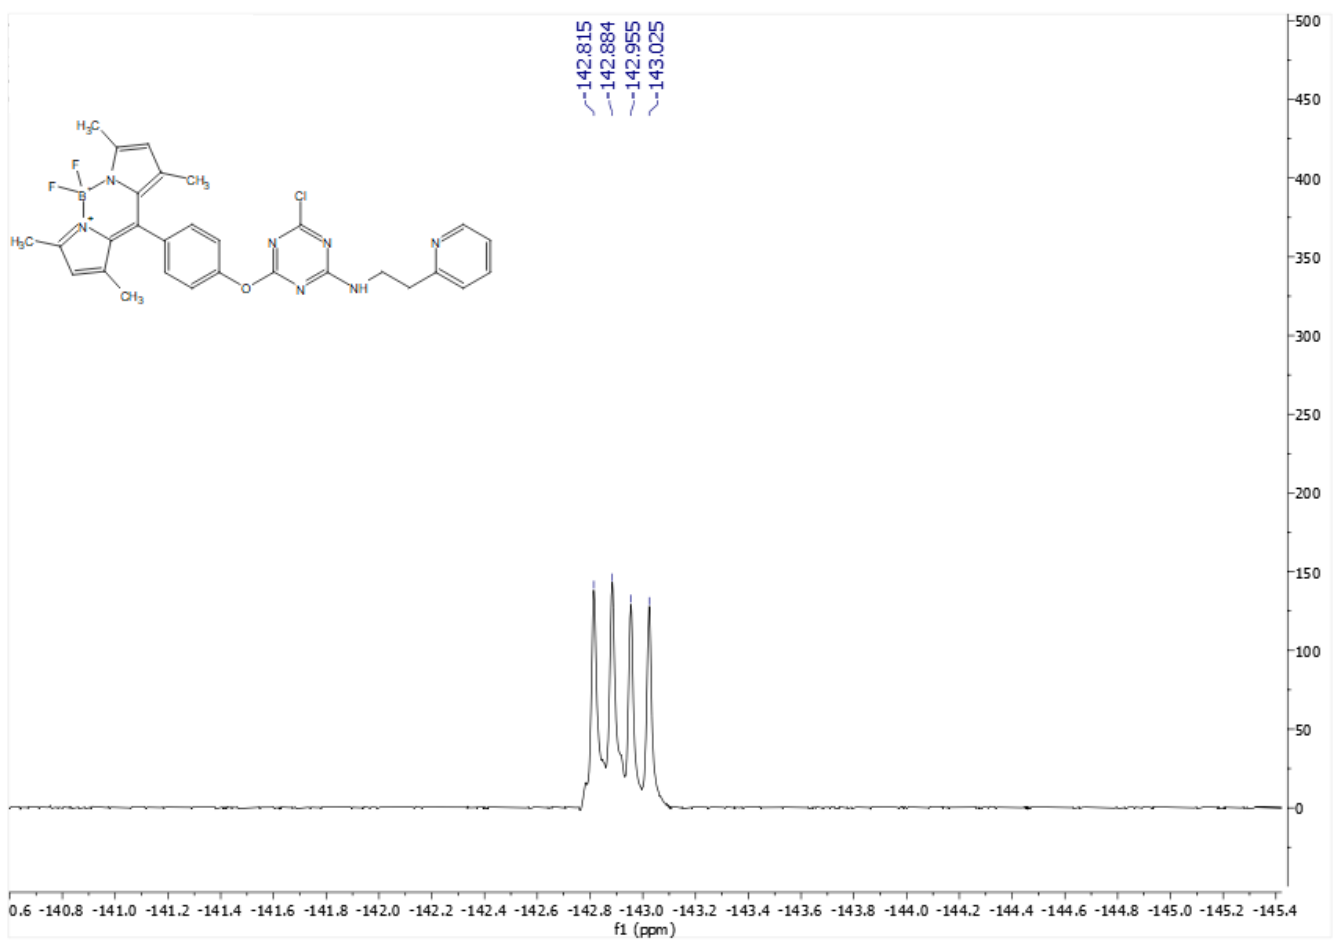

Figure S26 – <sup>19</sup>F NMR spectrum (470 MHz) of 4 in CDCl<sub>3</sub>.

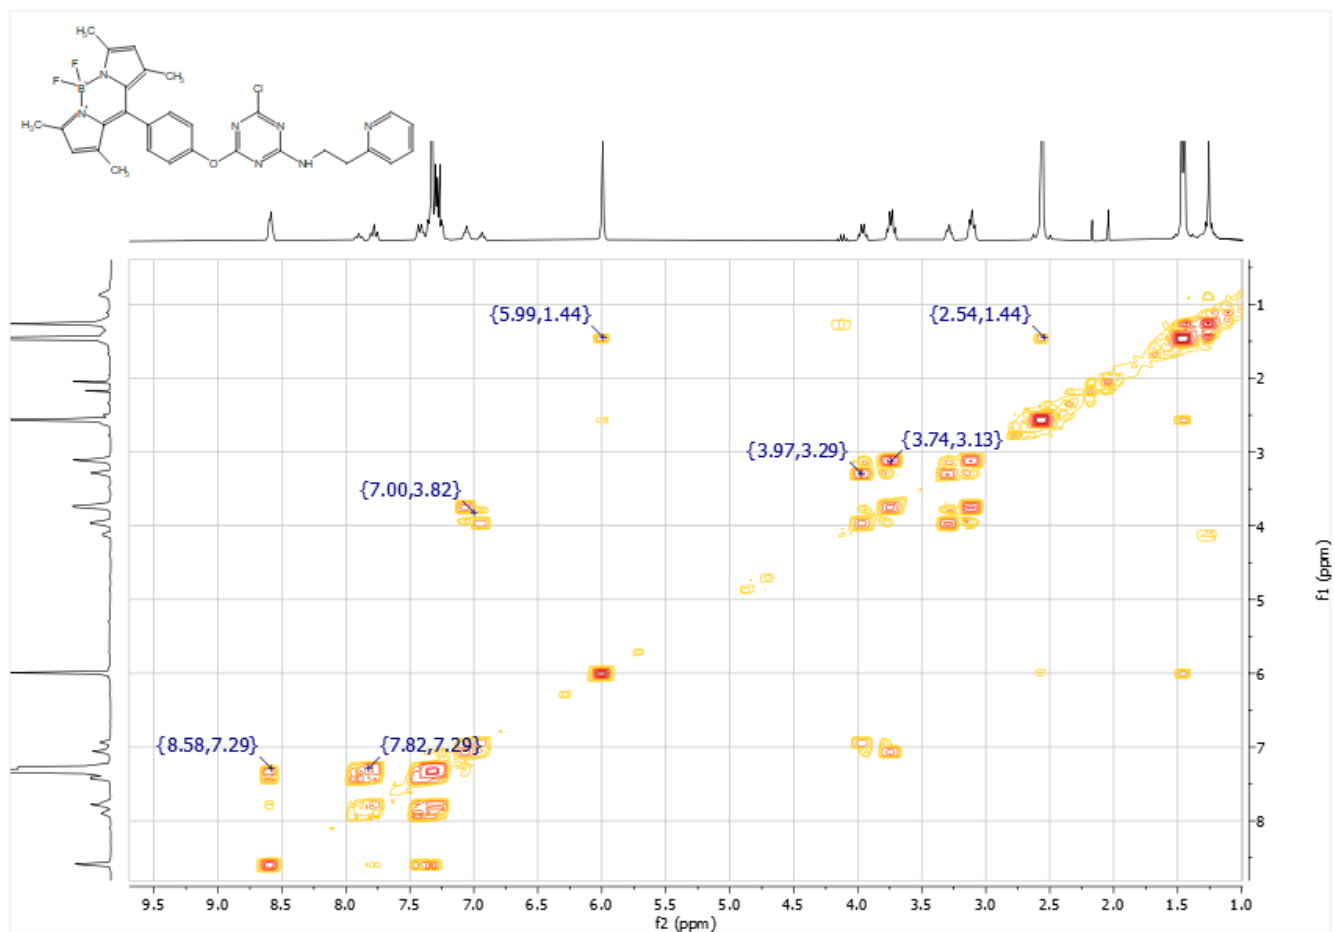

Figure S27 –  $^1\text{H}\times^1\text{H}$ -COSY spectrum of 4.

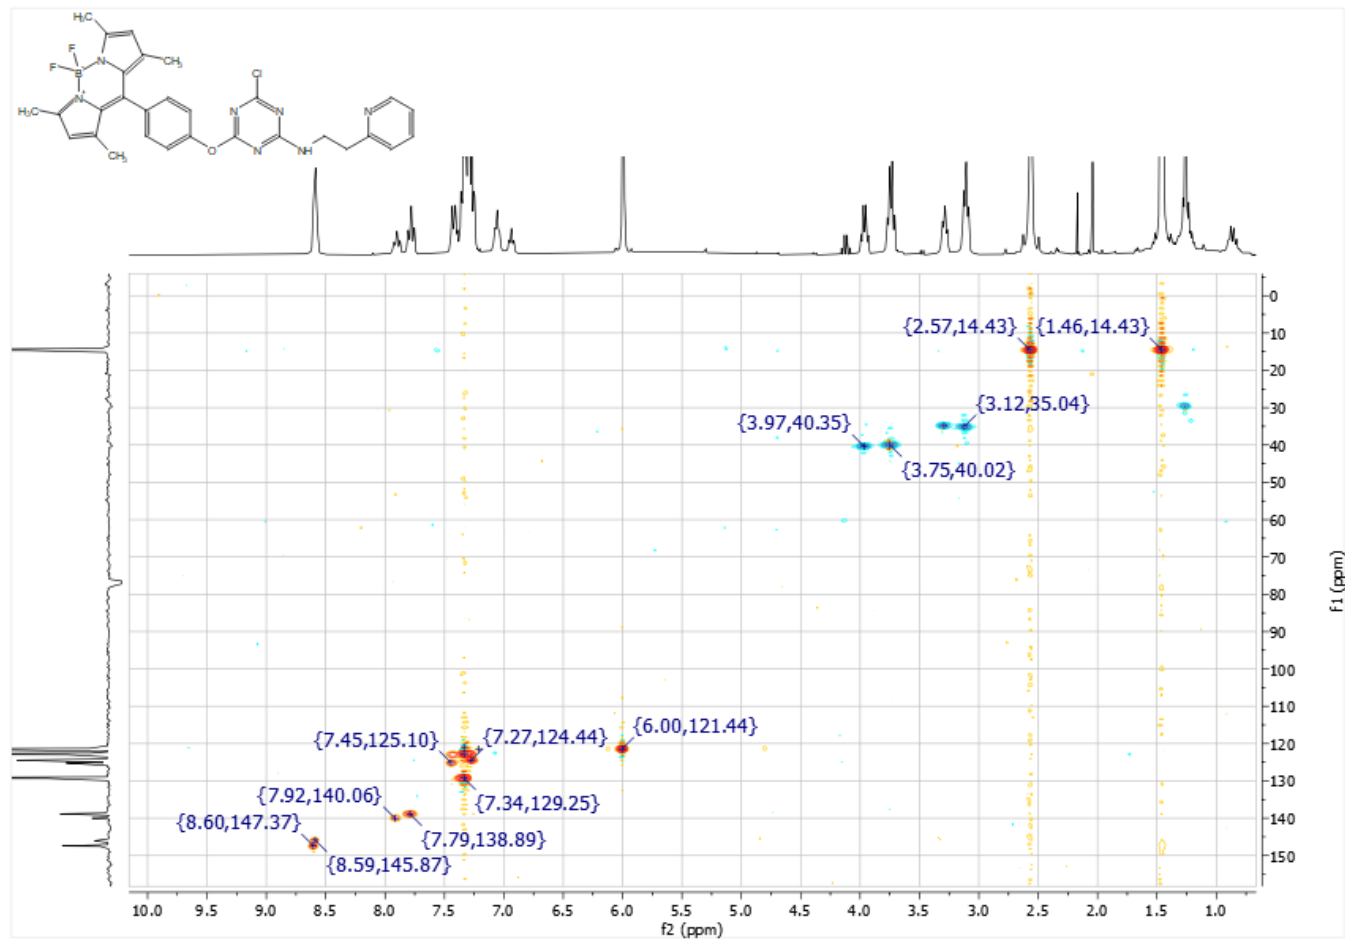

Figure S28 –  $^1\text{H}\times^{13}\text{C}$ -HSQC spectrum of 4.

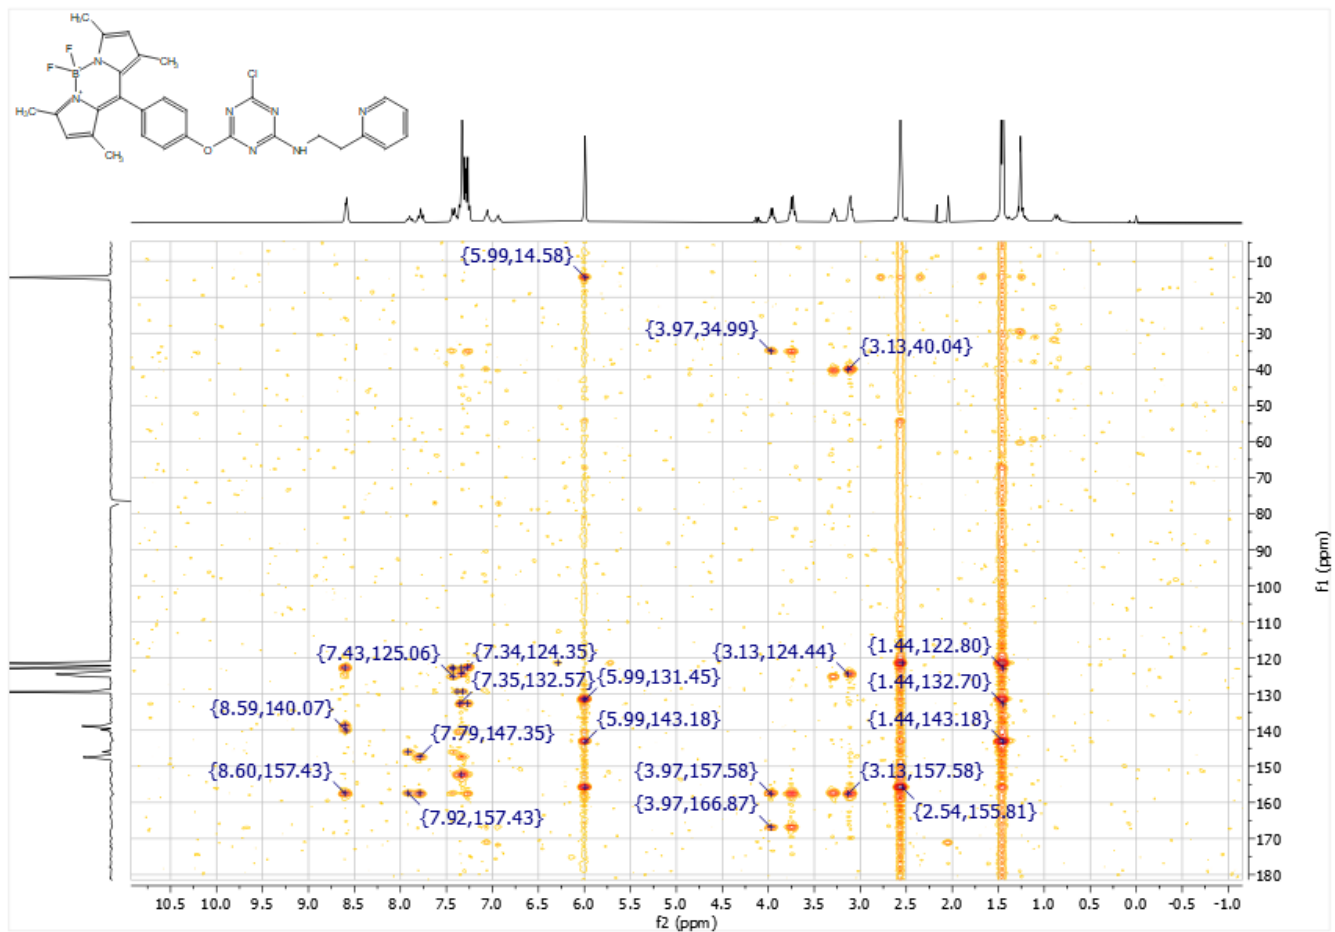

Figure S29 –  $^1\text{H}\times^{13}\text{C}$  – HMBC spectrum of 4.

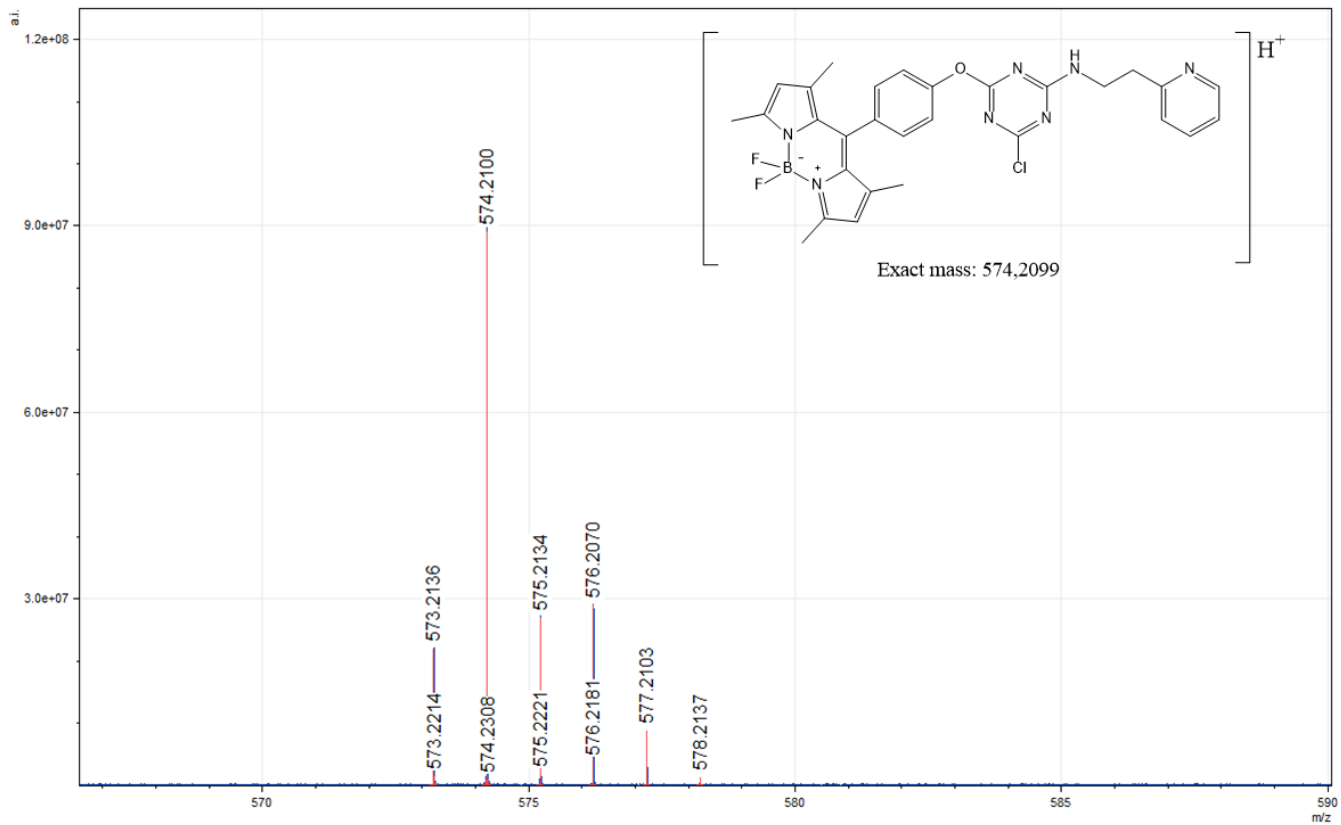

Figure S30– HRMS spectrum of 4.



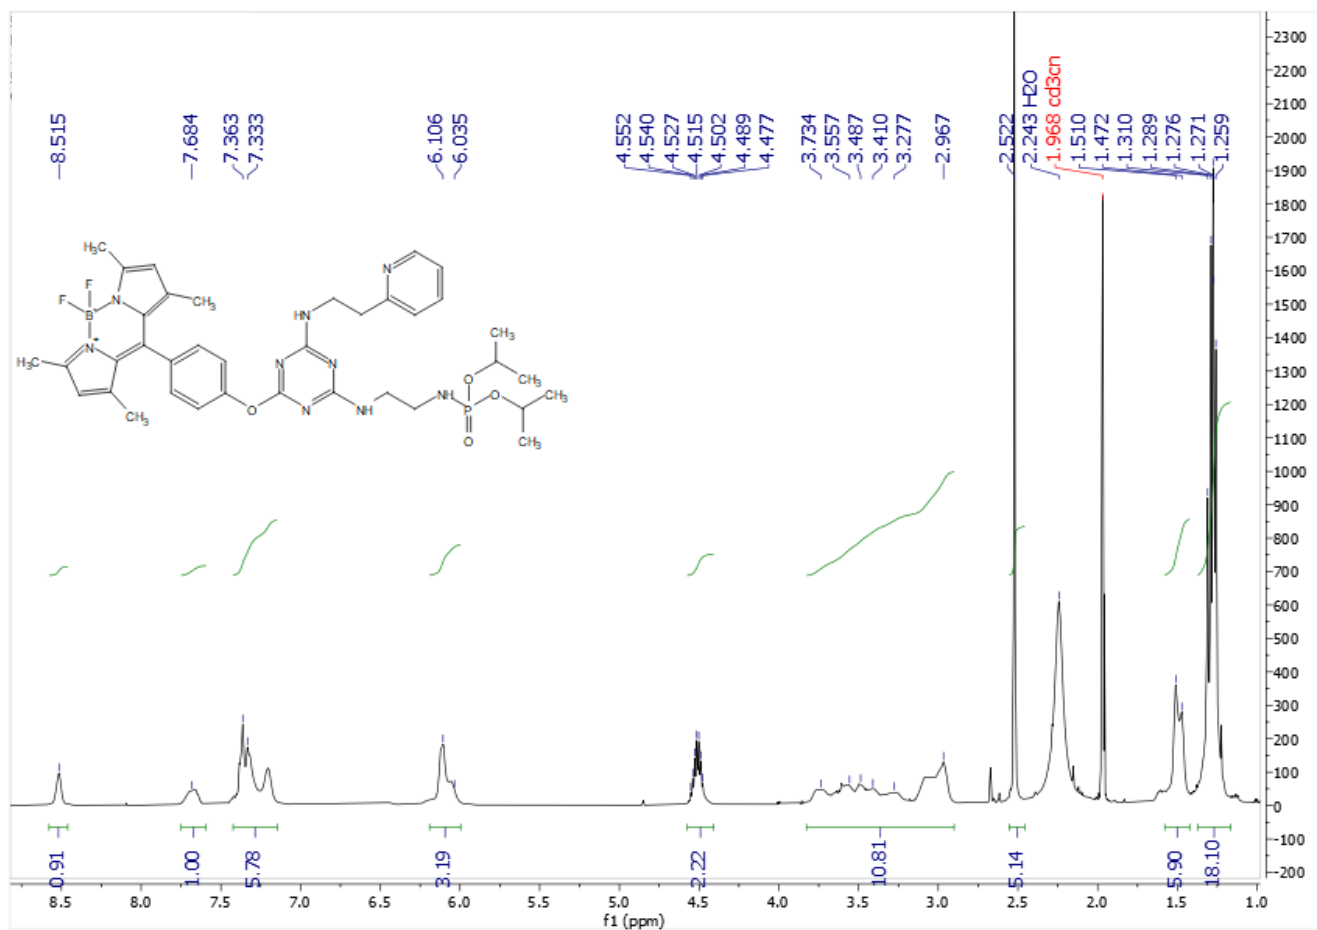

Figure S31 – <sup>1</sup>H NMR spectrum (500 MHz) of **5a** in CD<sub>3</sub>CN.

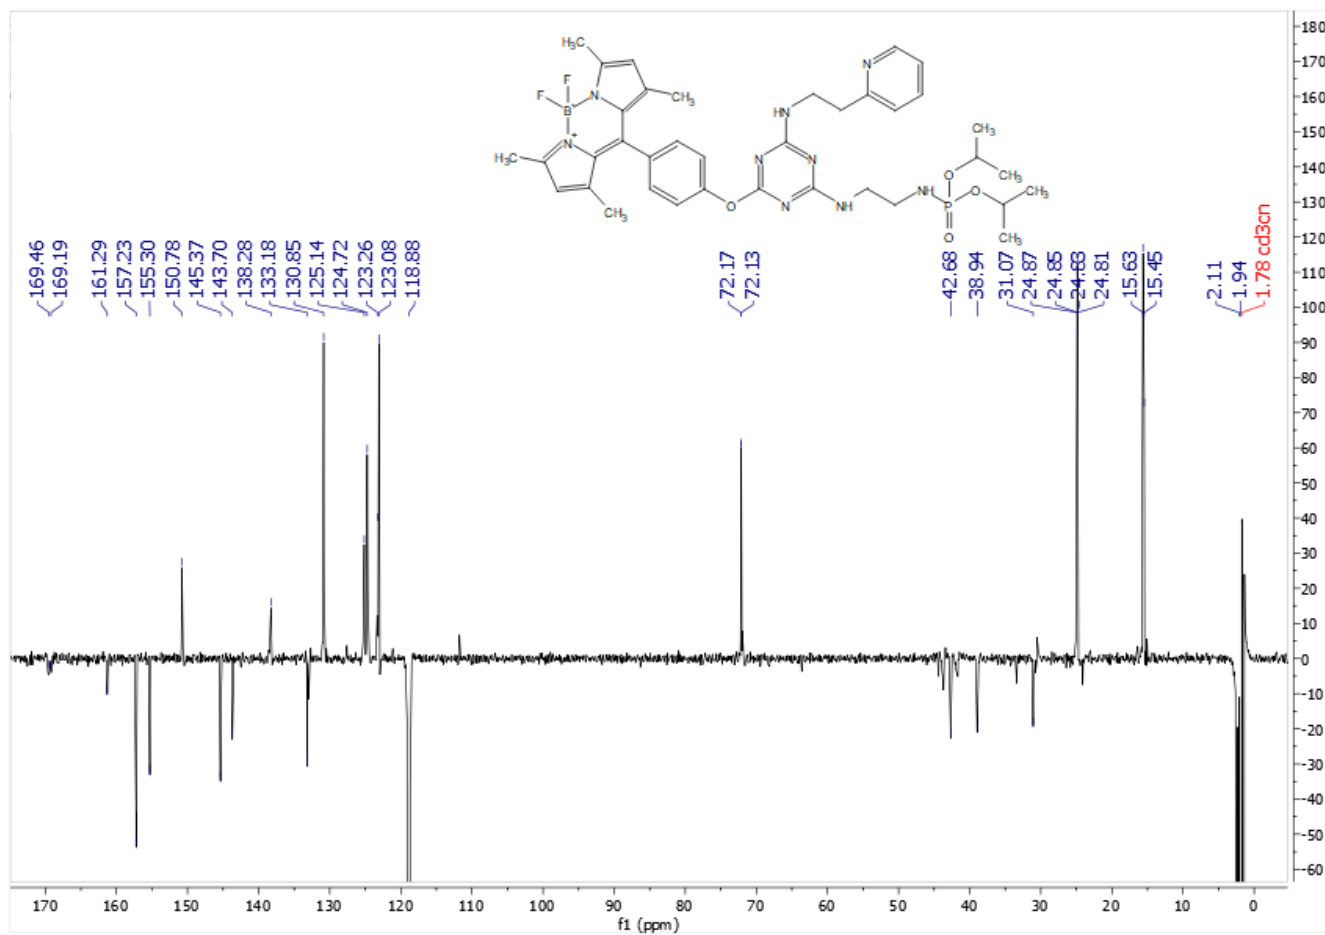

Figure S32 – <sup>13</sup>C-APT NMR spectrum (125 MHz) of **5a** in CD<sub>3</sub>CN.

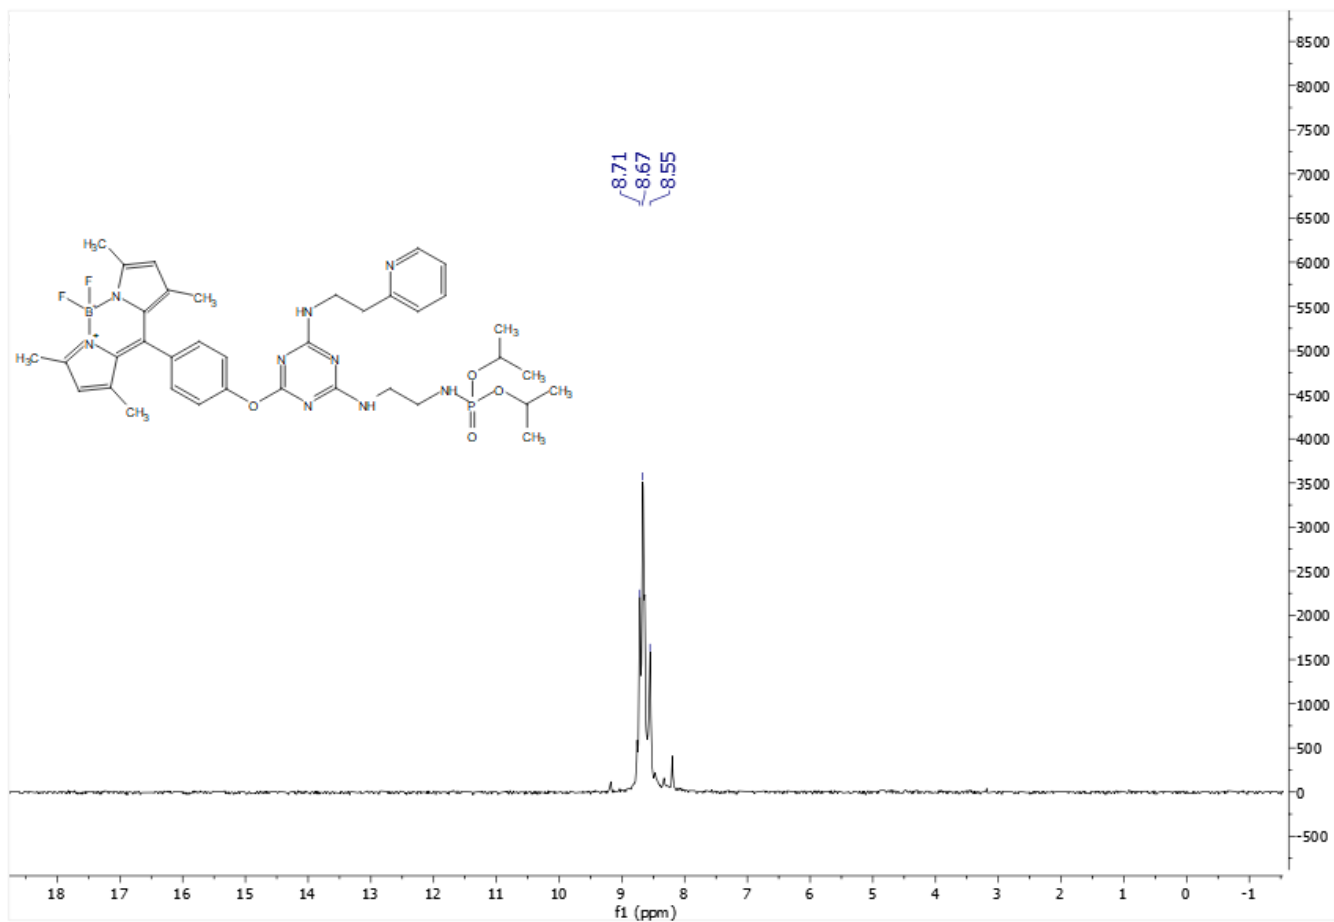

**Figure S33** –  $^{31}\text{P}$  NMR spectrum (202 MHz) of **5a** in  $\text{CD}_3\text{CN}$ .

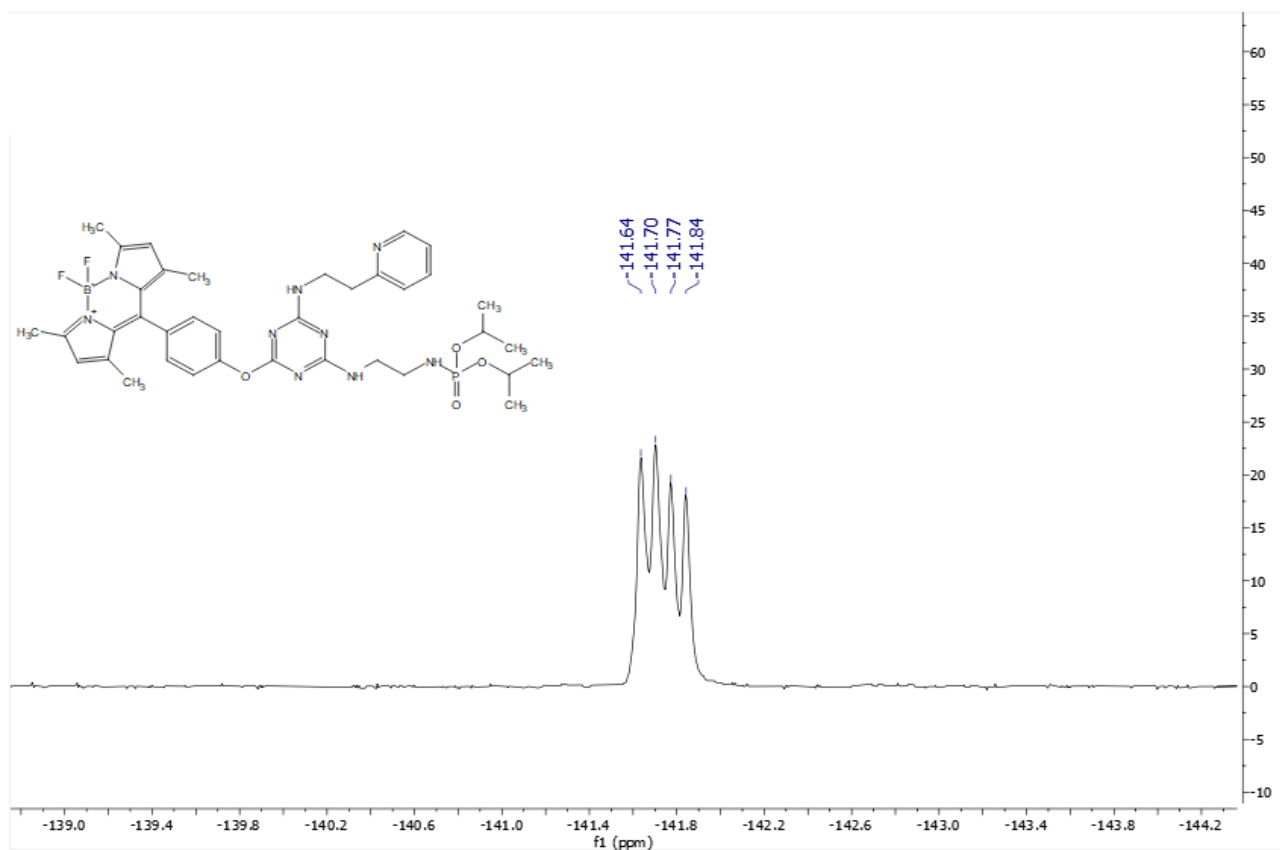

**Figure S34** –  $^{19}\text{F}$  NMR spectrum (470 MHz) of **5a** in  $\text{CD}_3\text{CN}$ .

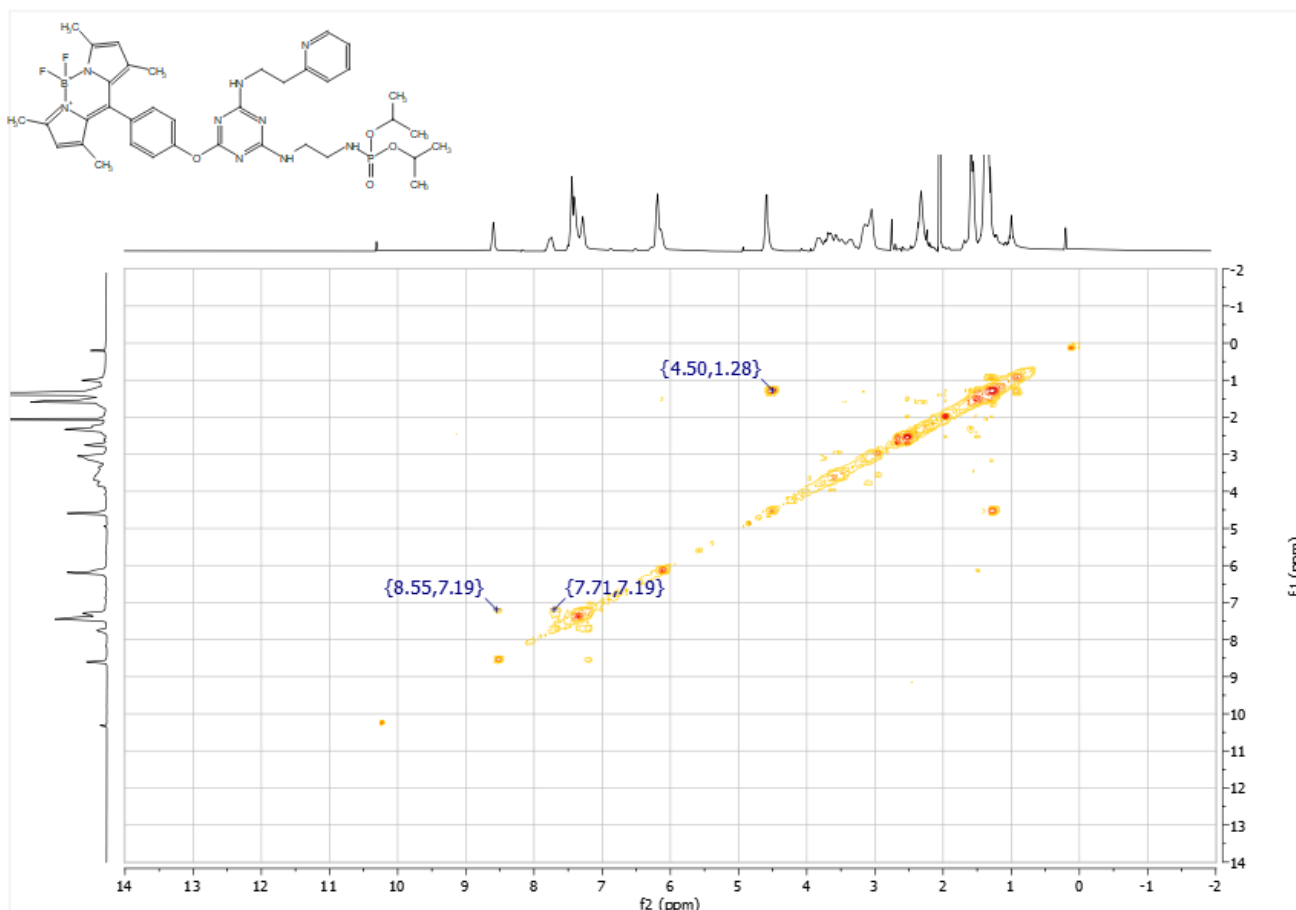

Figure S35 –  $^1\text{H}\times^1\text{H}$ -COSY spectrum of **5a**.

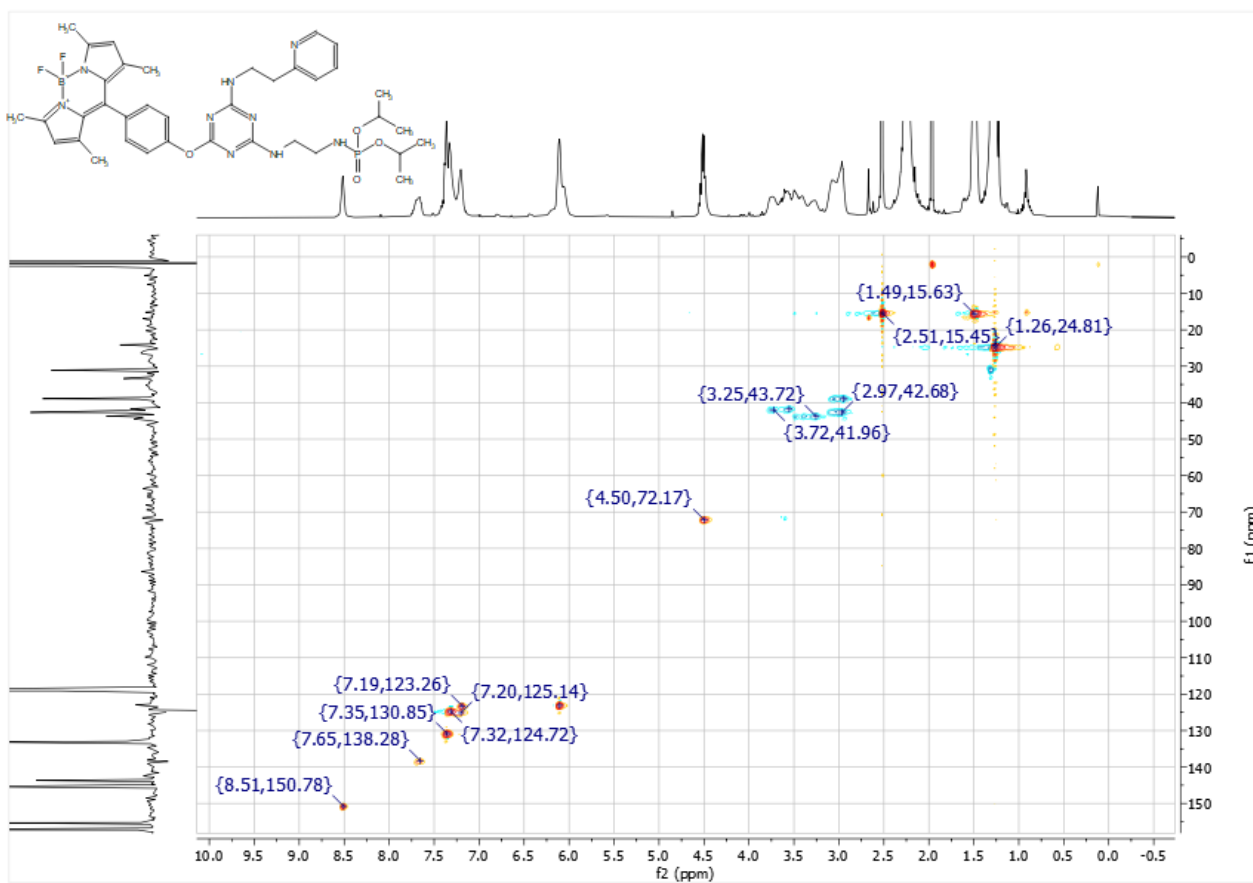

Figure S36 –  $^1\text{H}\times^{13}\text{C}$ -HSQC spectrum of **5a**.

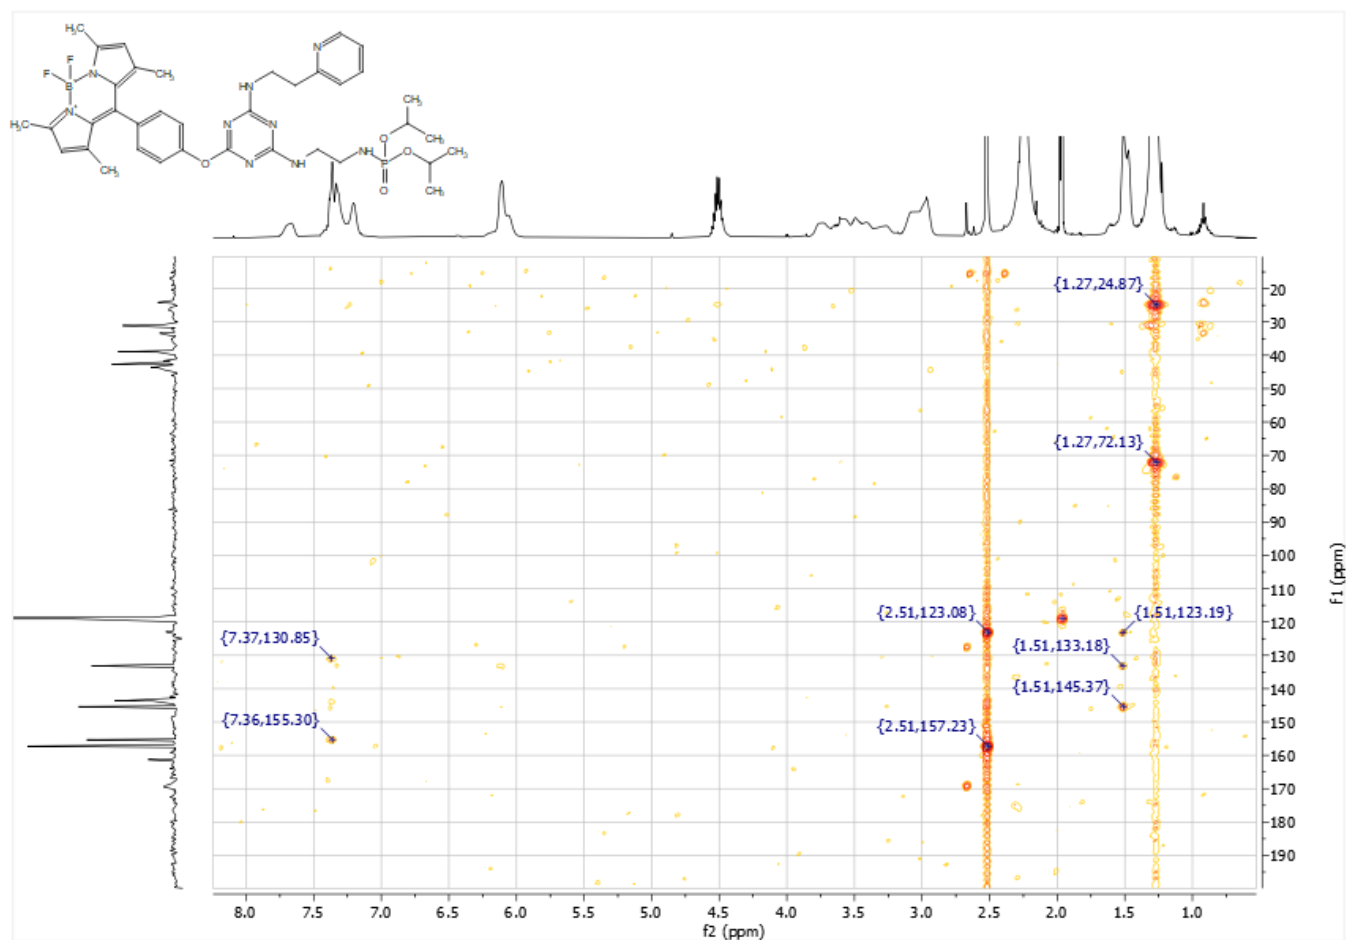

Figure S37 –  $^1\text{H}\times^{13}\text{C}$  – HMBC spectrum of 5a.

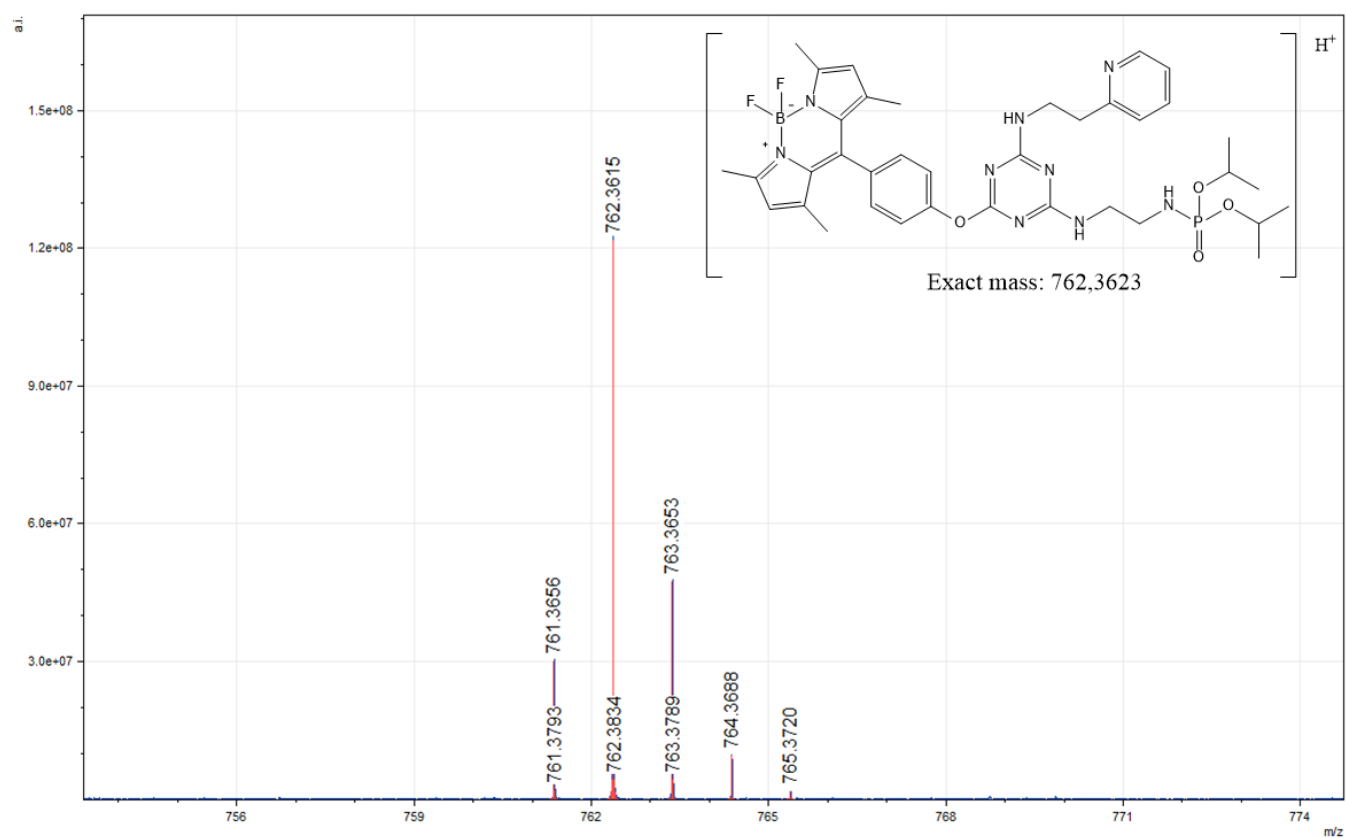

Figure S38 – HRMS spectrum of 5a.

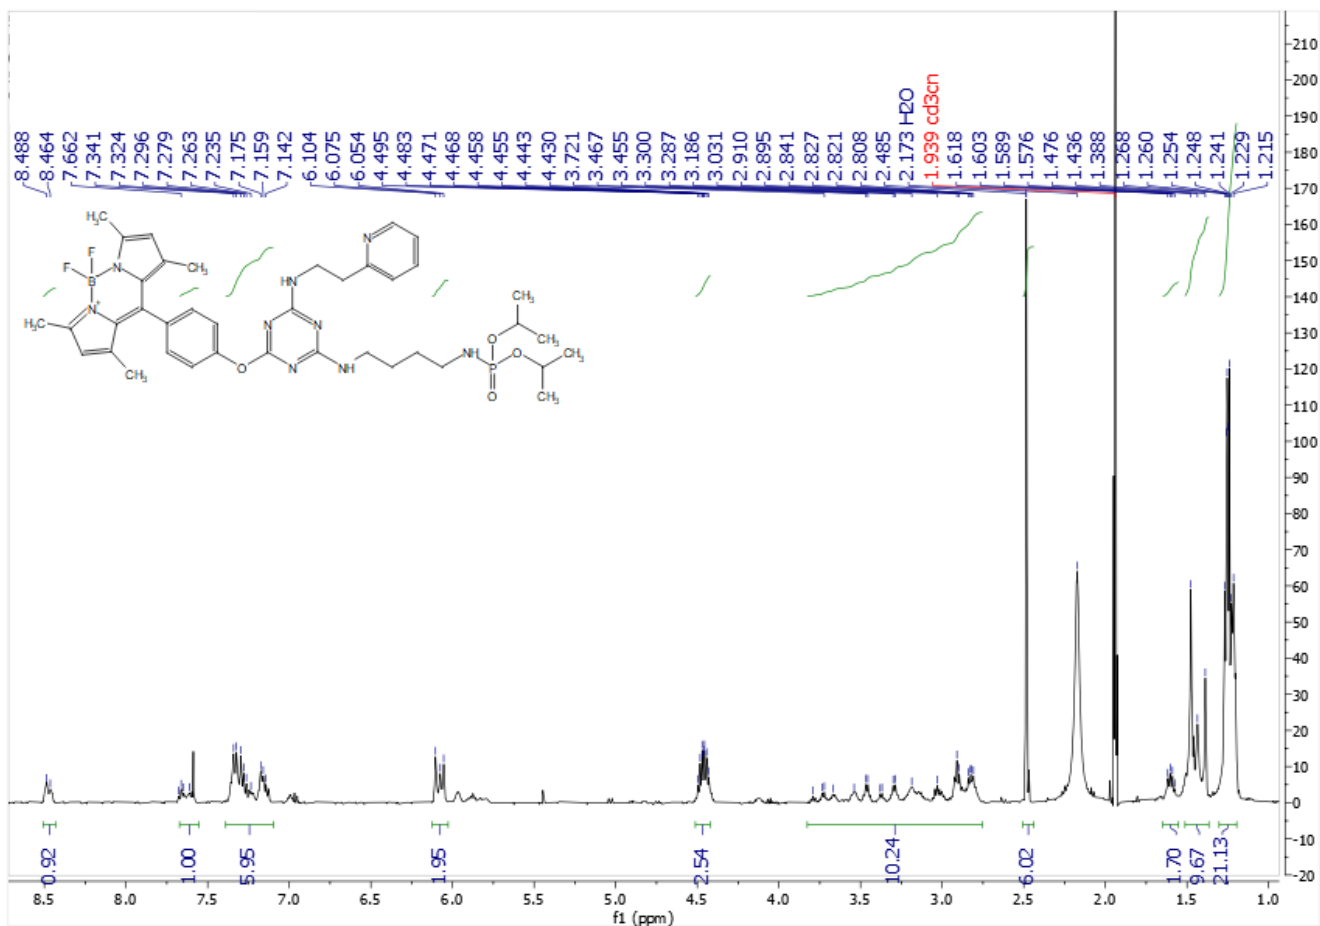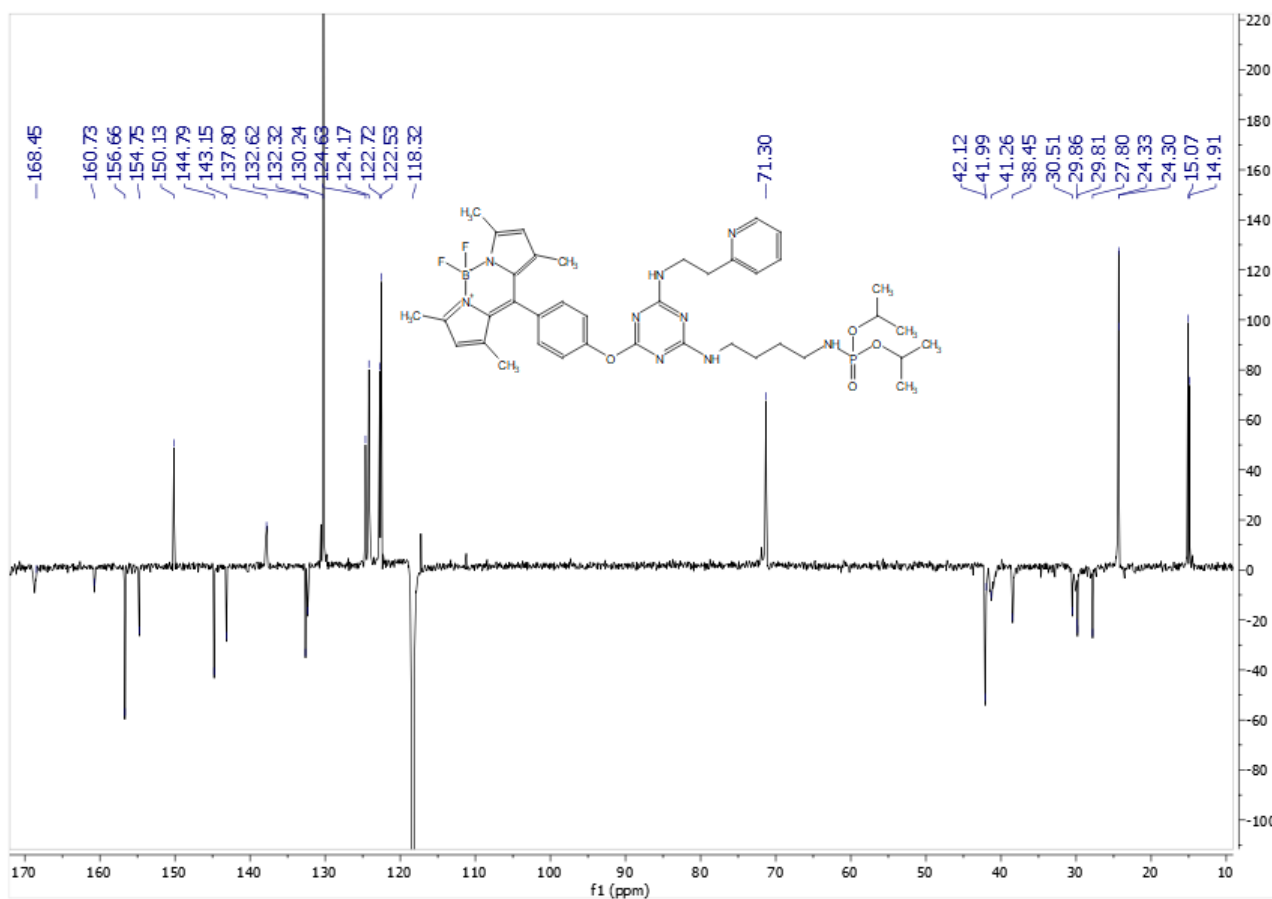

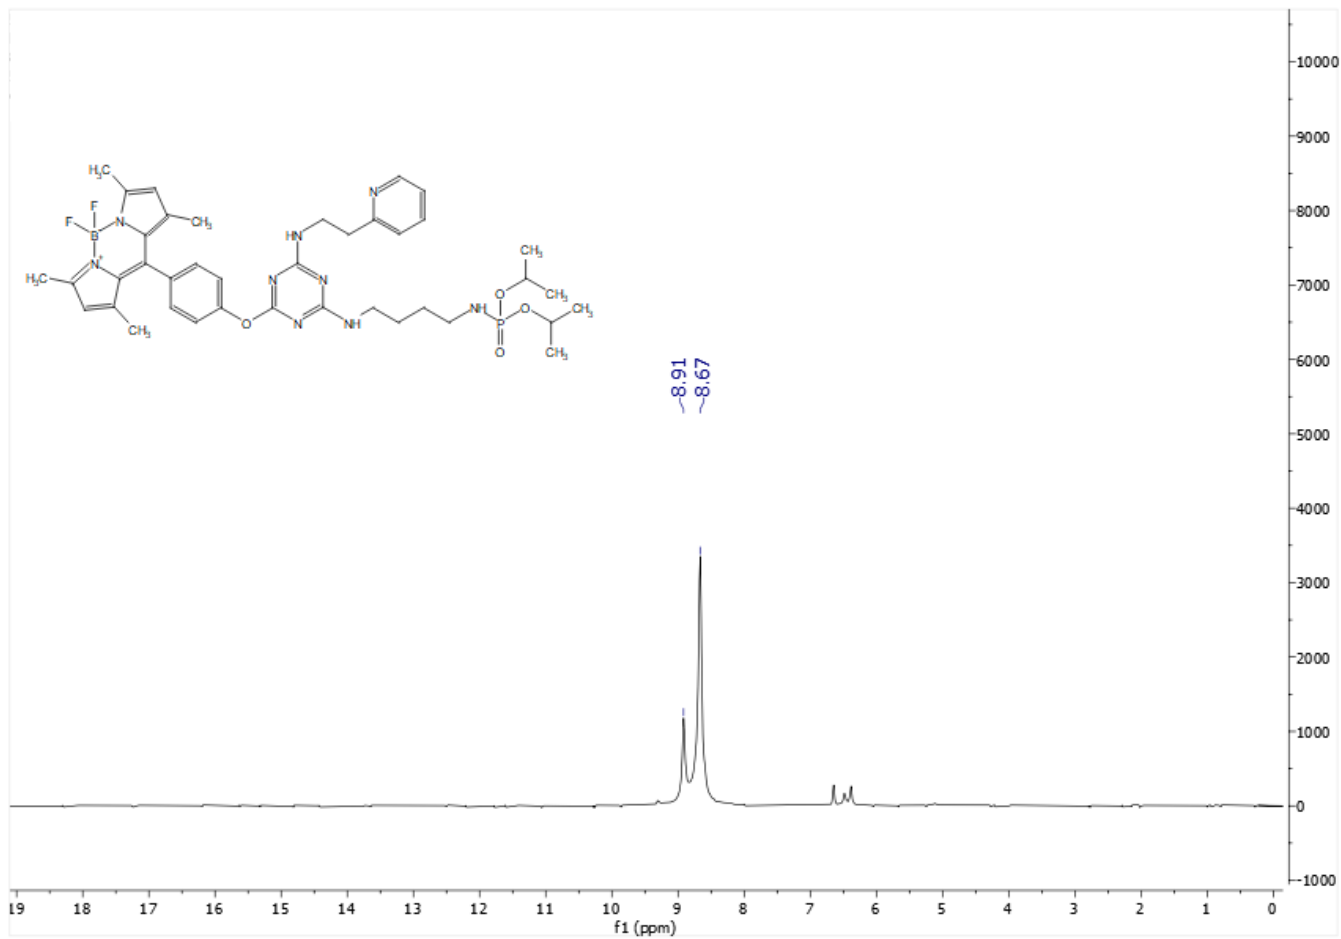

Figure S41 –  $^{31}\text{P}$  NMR spectrum (202 MHz) of **5b** in  $\text{CD}_3\text{CN}$ .

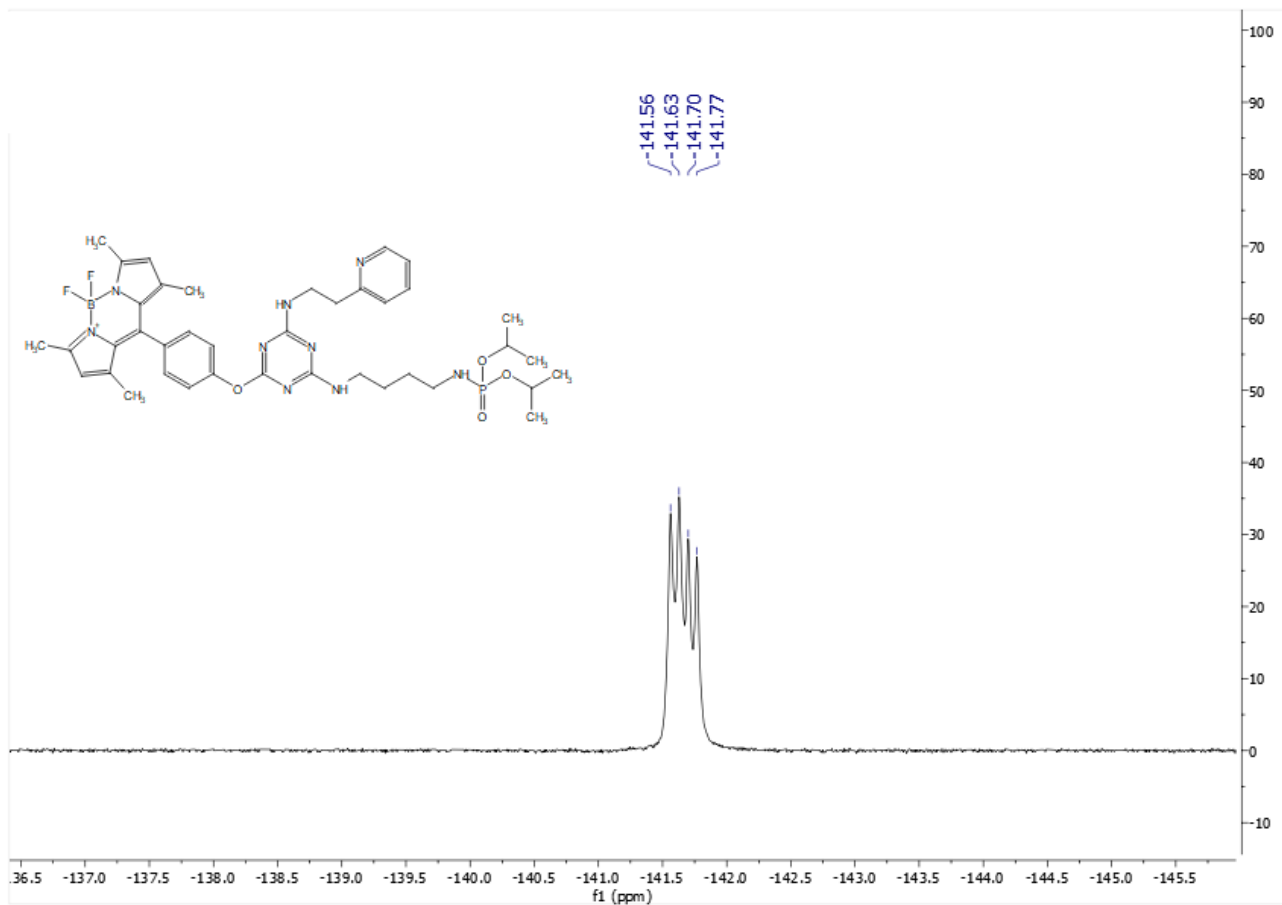

Figure S42 –  $^{19}\text{F}$  NMR spectrum (470 MHz) of **5b** in  $\text{CD}_3\text{CN}$ .

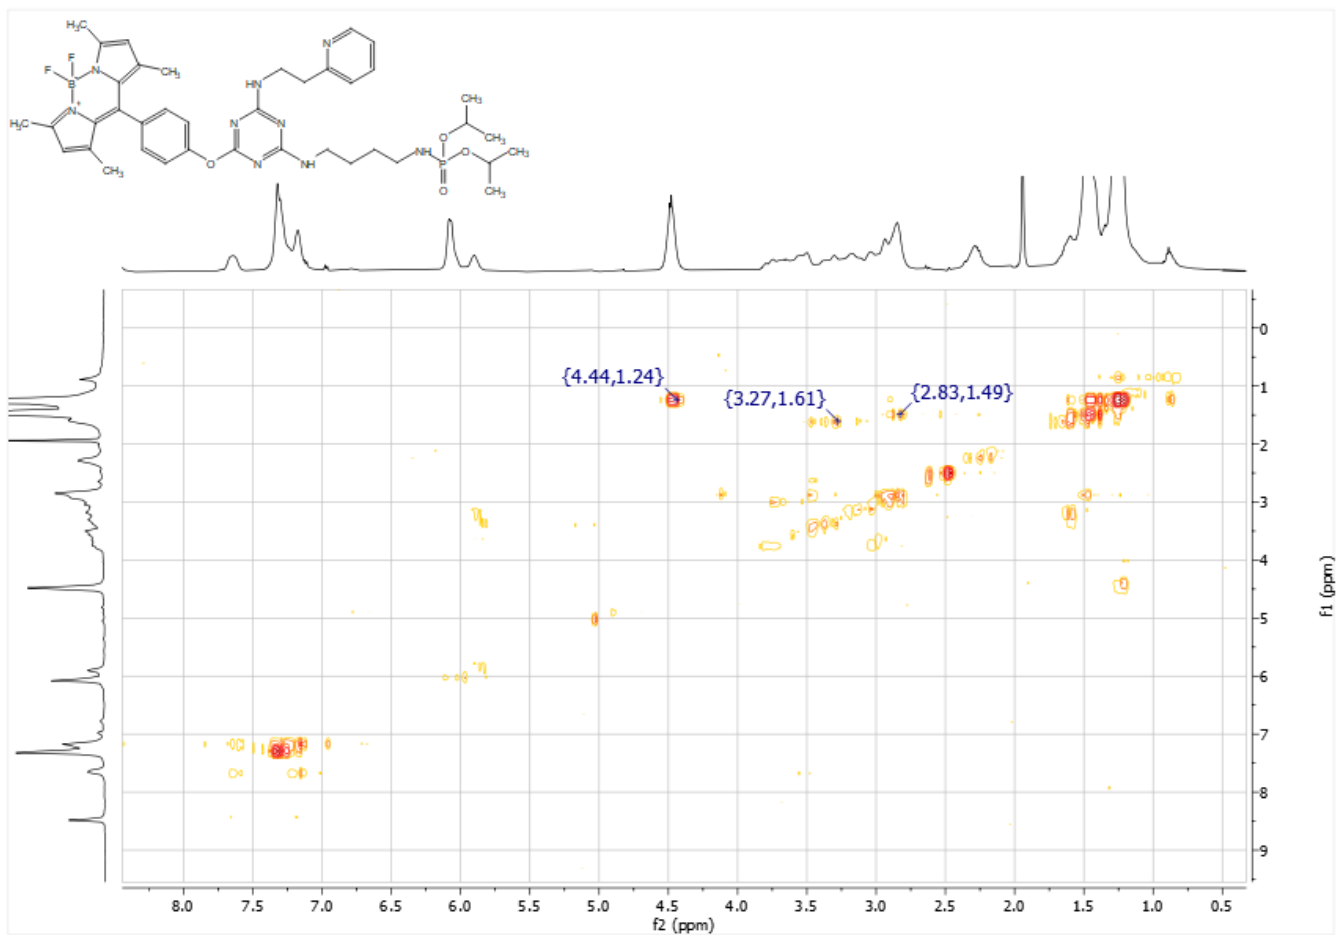

Figure S43 –  $^1\text{H}\times^1\text{H}$ -COSY of **5b**.

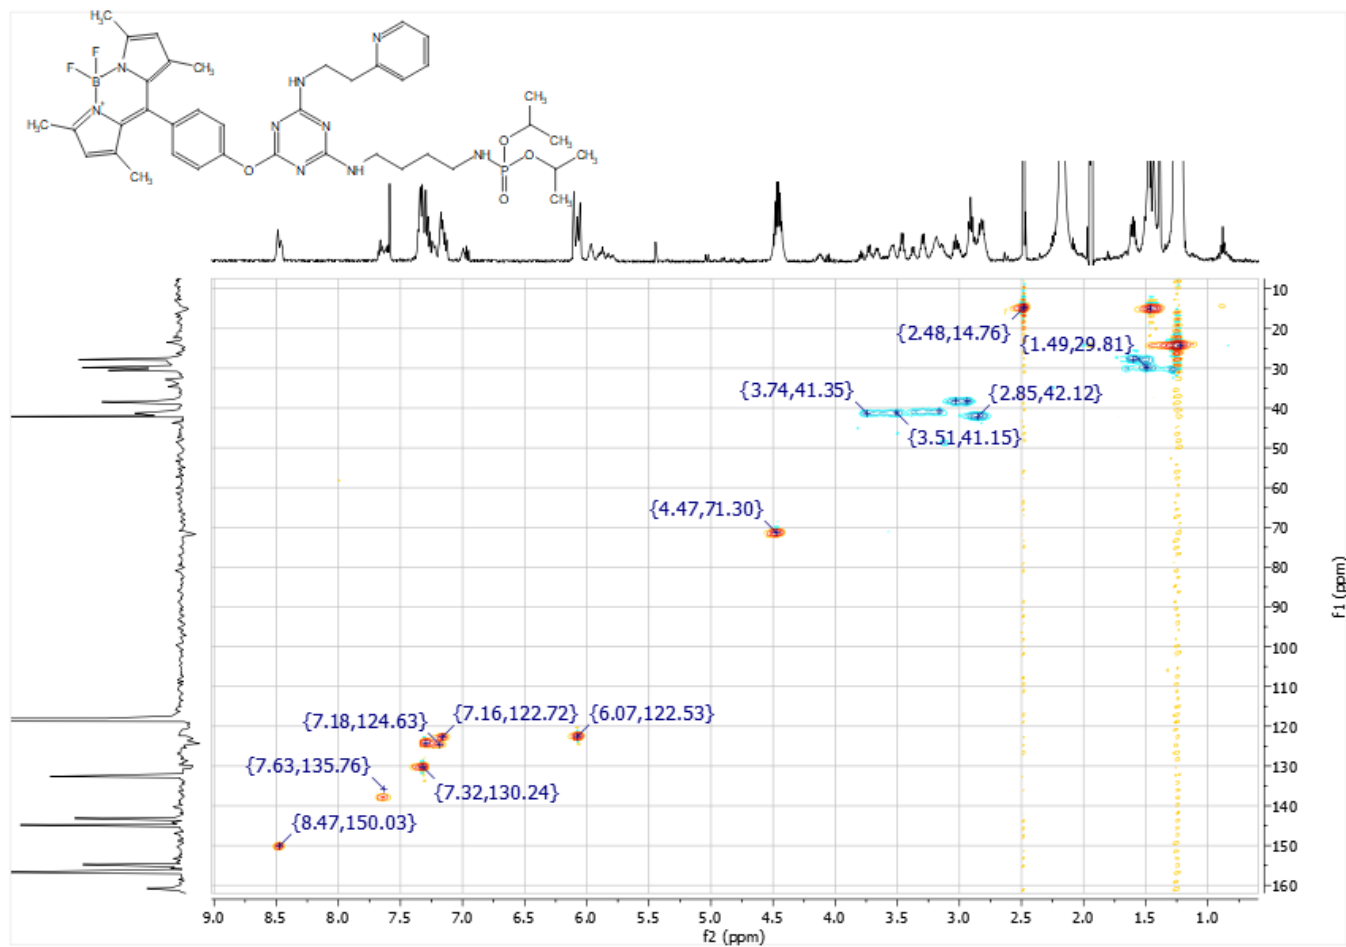

Figure S44 –  $^1\text{H}\times^{13}\text{C}$ -HSQC spectrum of **5b**.

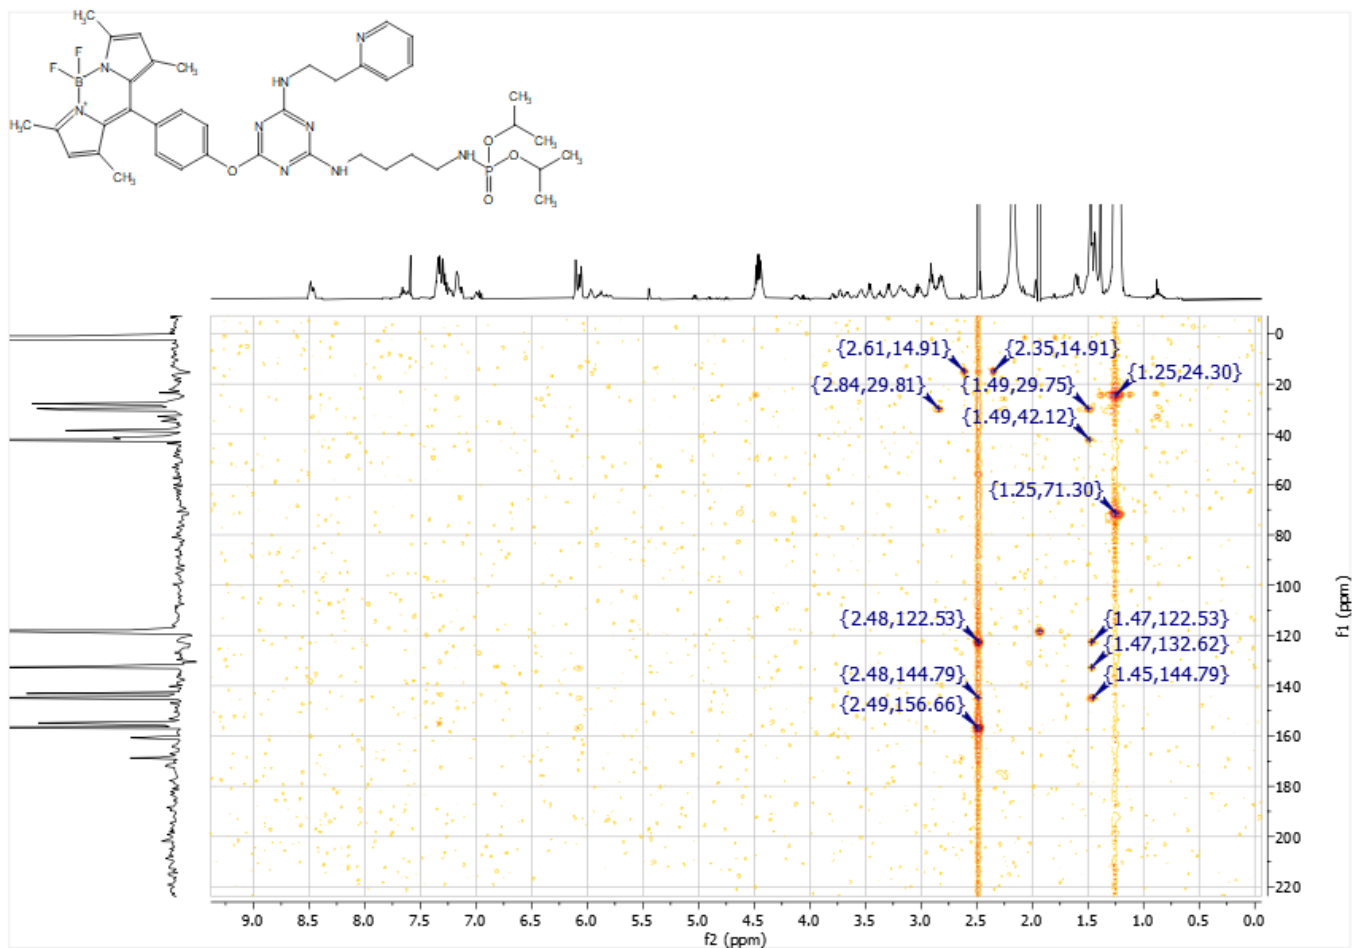

Figure S45 –  $^1\text{H}\times^{13}\text{C}$  – HMBC spectrum of **5b**.

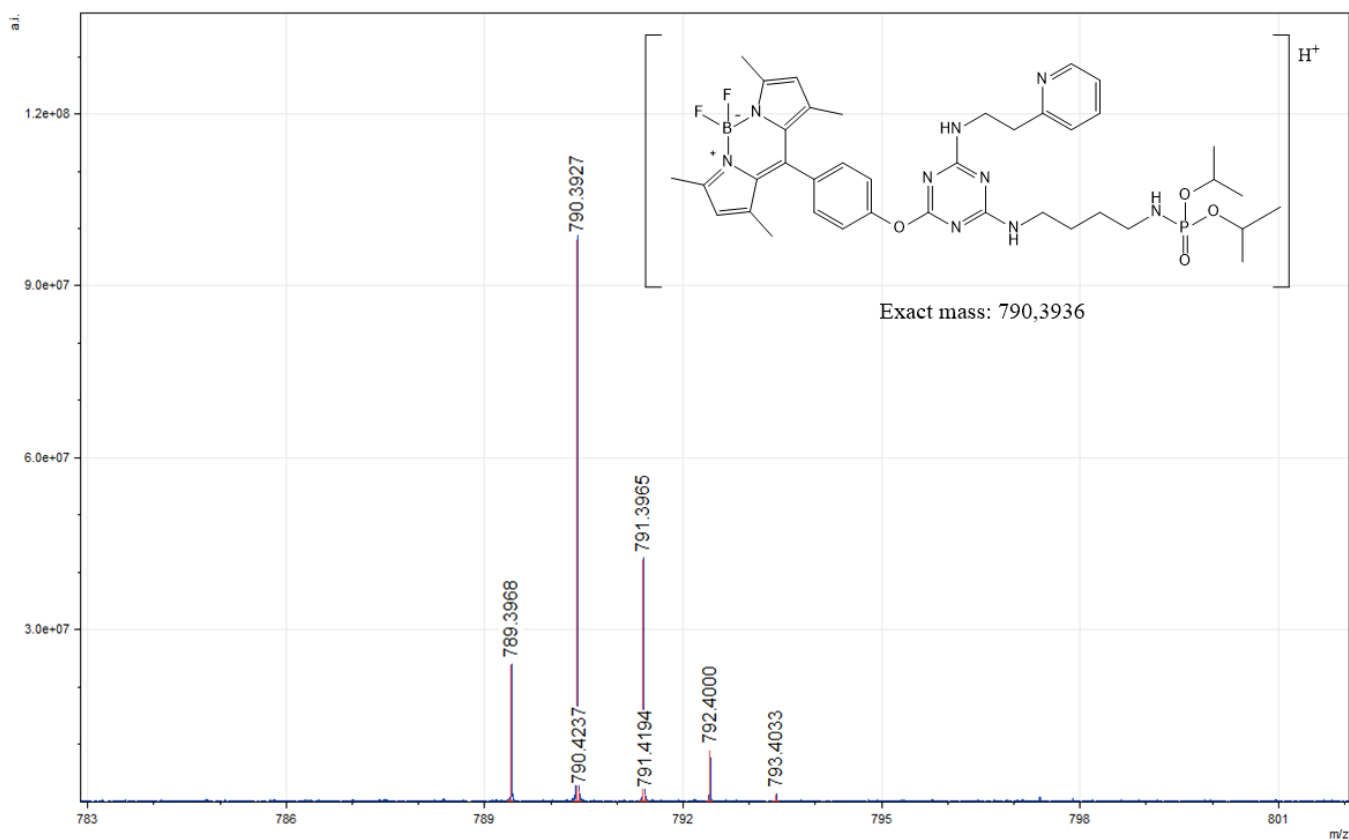

Figure S46 – HRMS spectrum of **5b**.



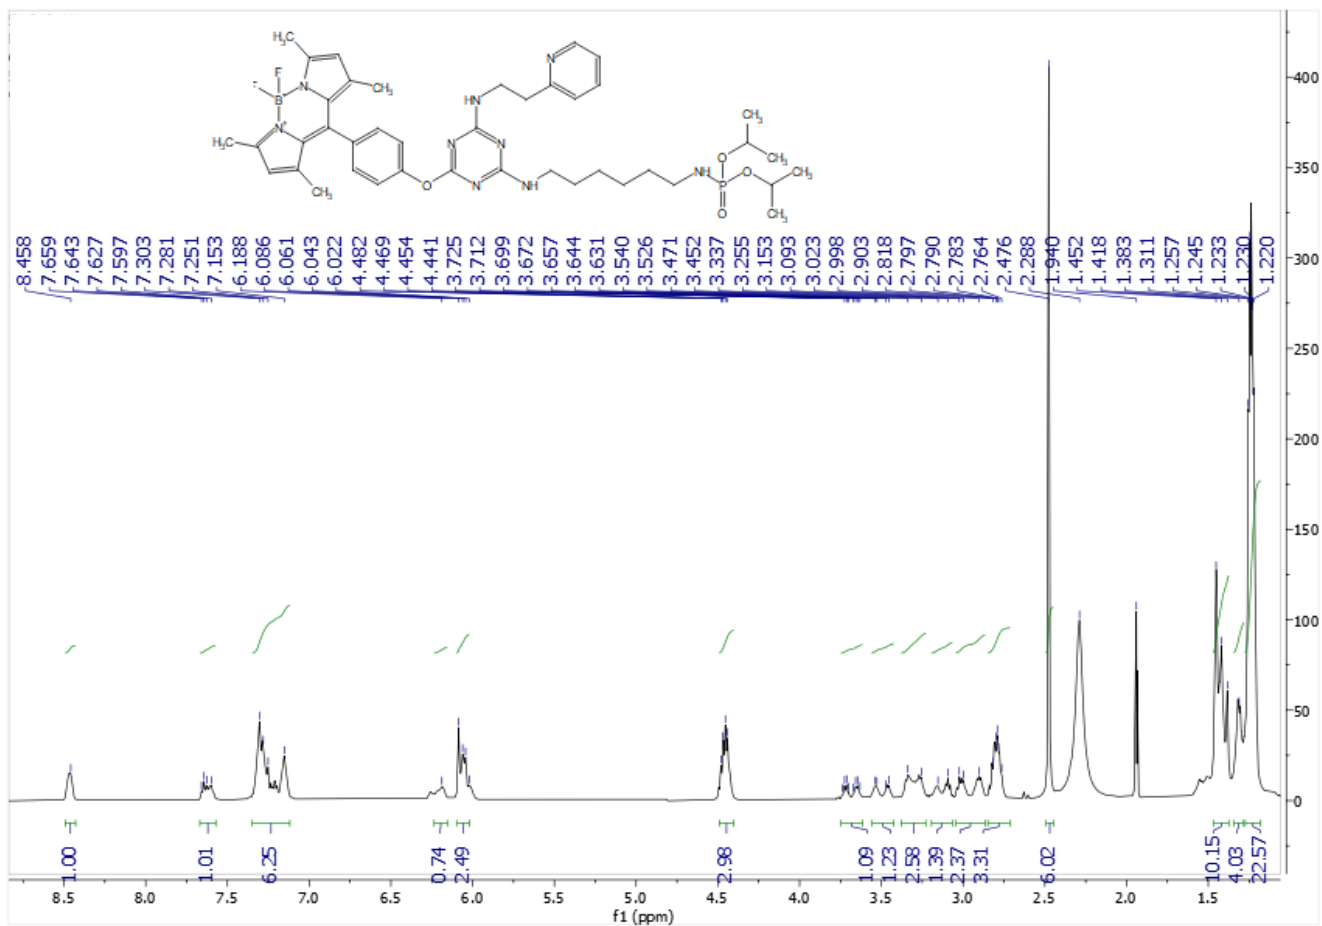

Figure S47 –  $^1\text{H}$  NMR spectrum (500 MHz) of **5c** in  $\text{CD}_3\text{CN}$ .

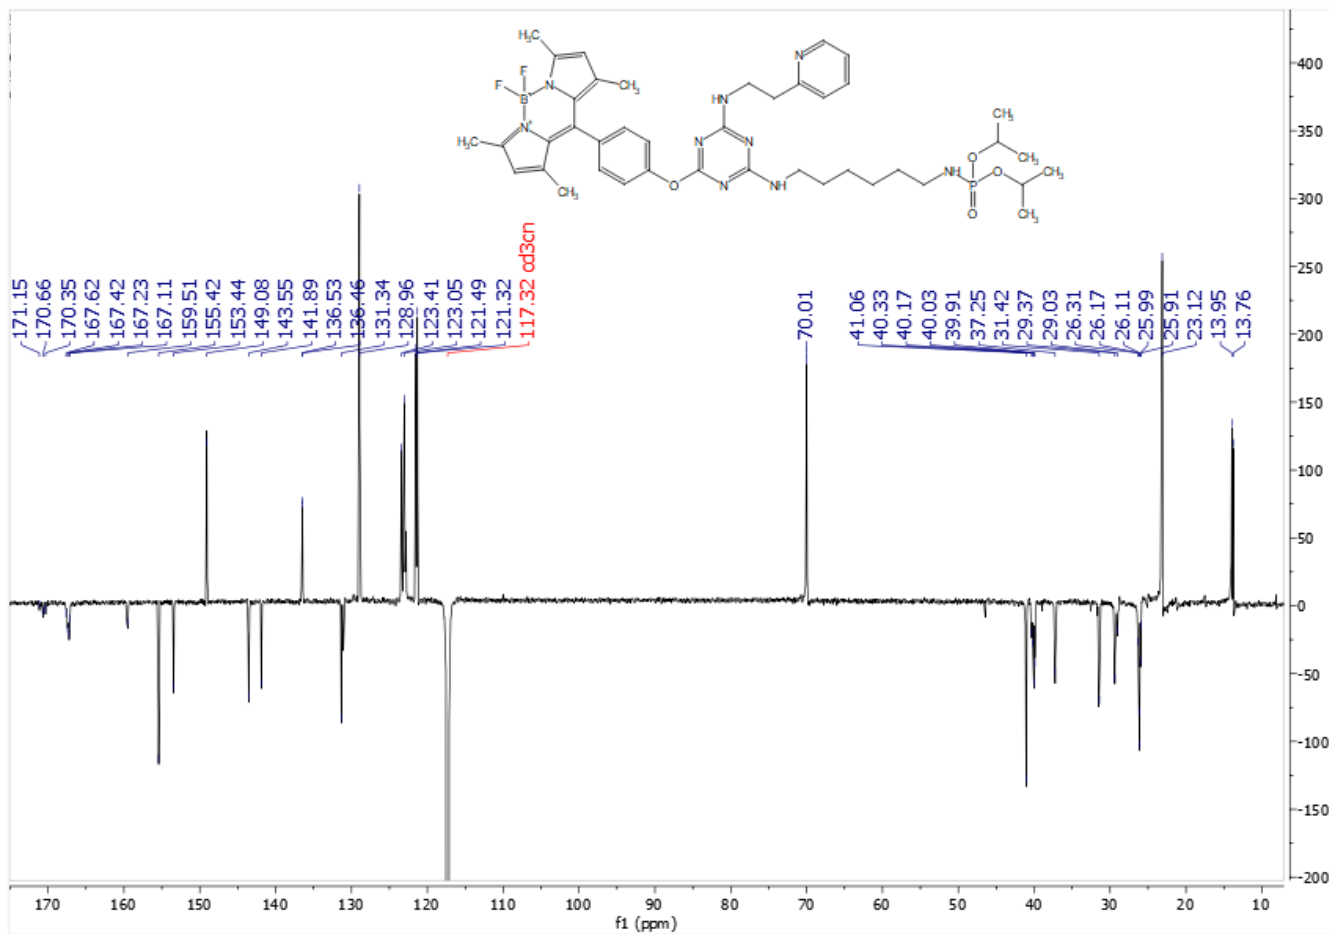

Figure S48 –  $^{13}\text{C}$ -APT NMR spectrum (125 MHz) of **5c** in  $\text{CD}_3\text{CN}$ .

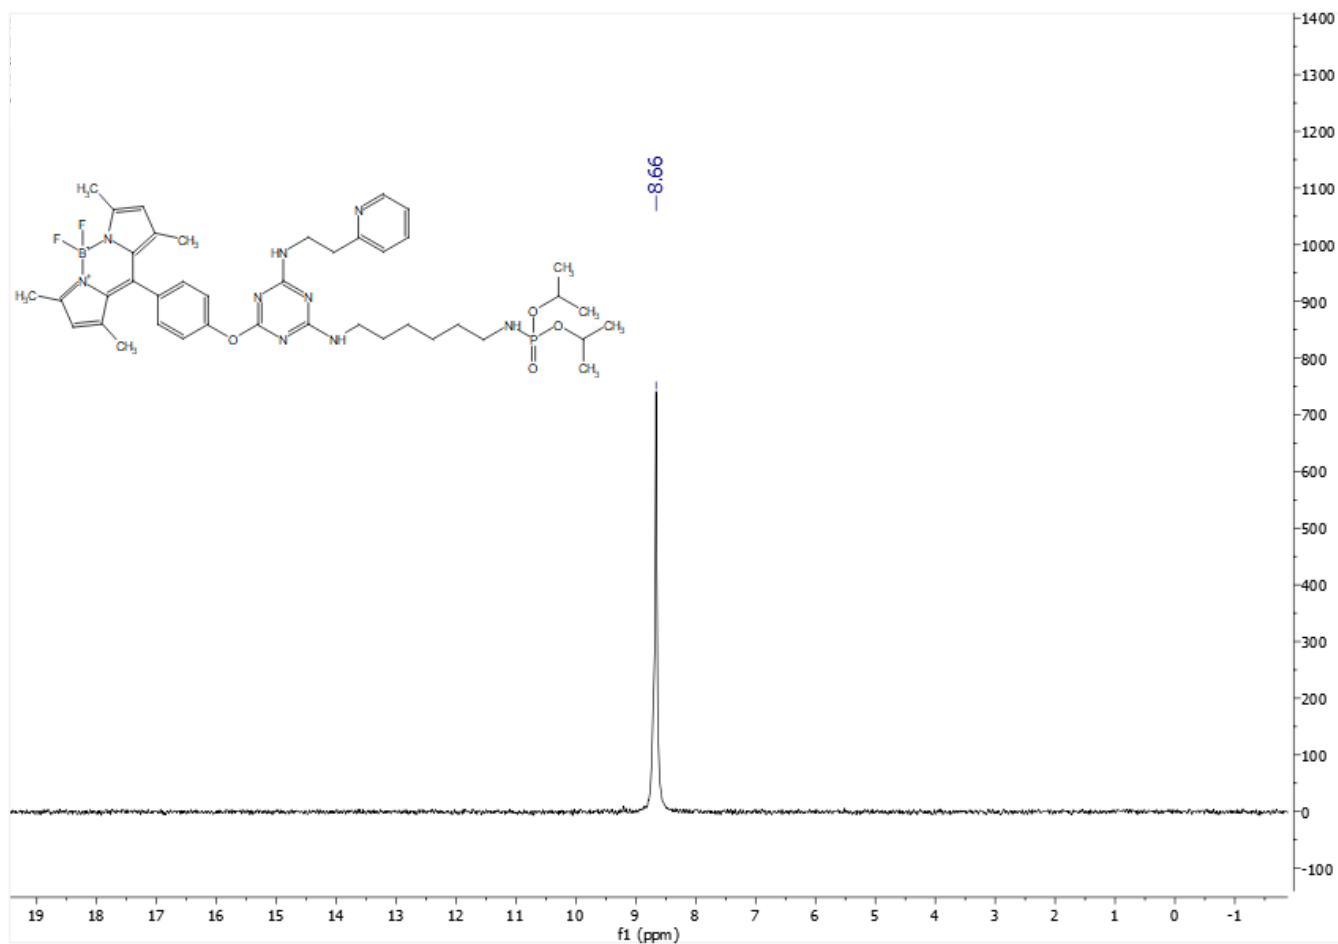

**Figure S49** –  $^{31}\text{P}$  NMR spectrum (202 MHz) of **5c** in  $\text{CD}_3\text{CN}$ .

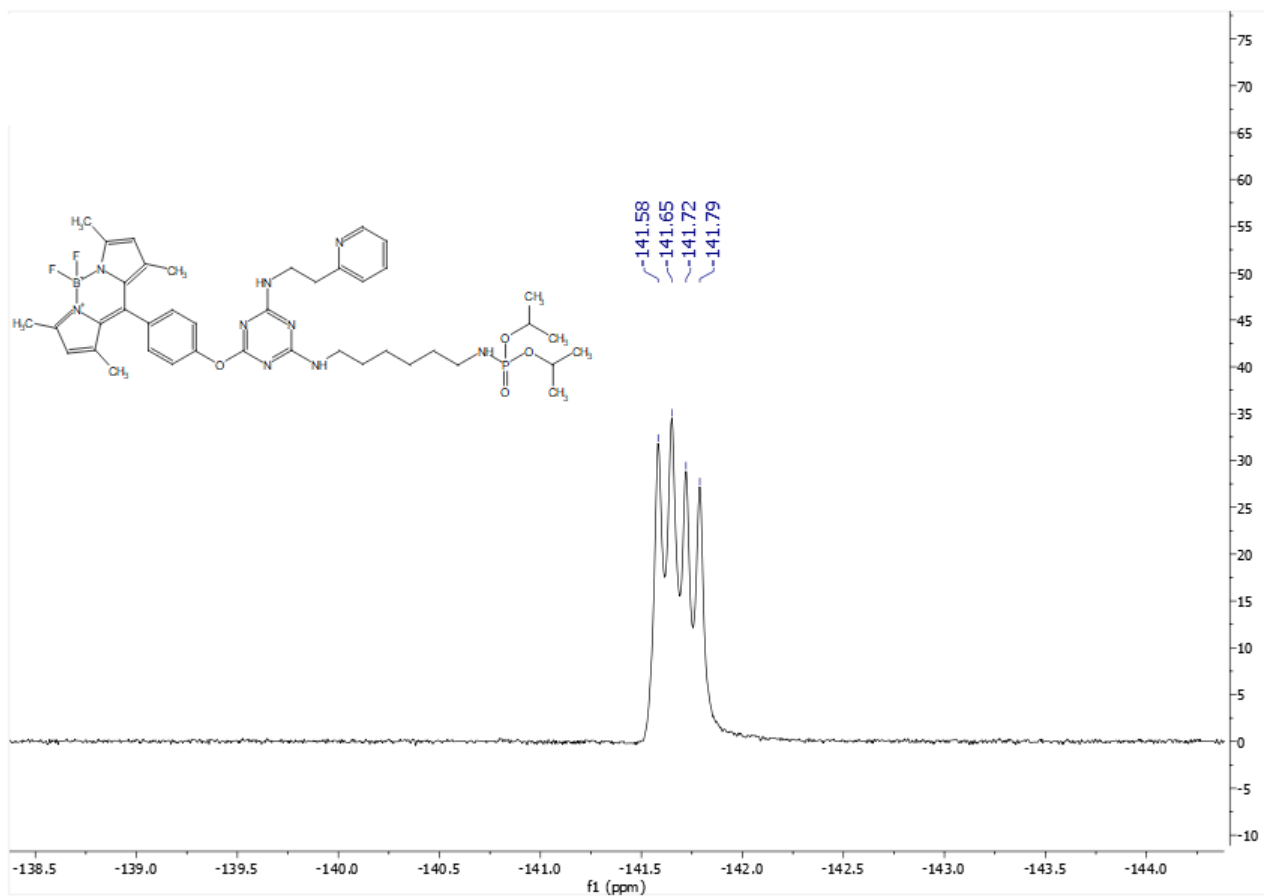

**Figure S50** –  $^{19}\text{F}$  NMR spectrum (470 MHz) of **5c** in  $\text{CD}_3\text{CN}$ .

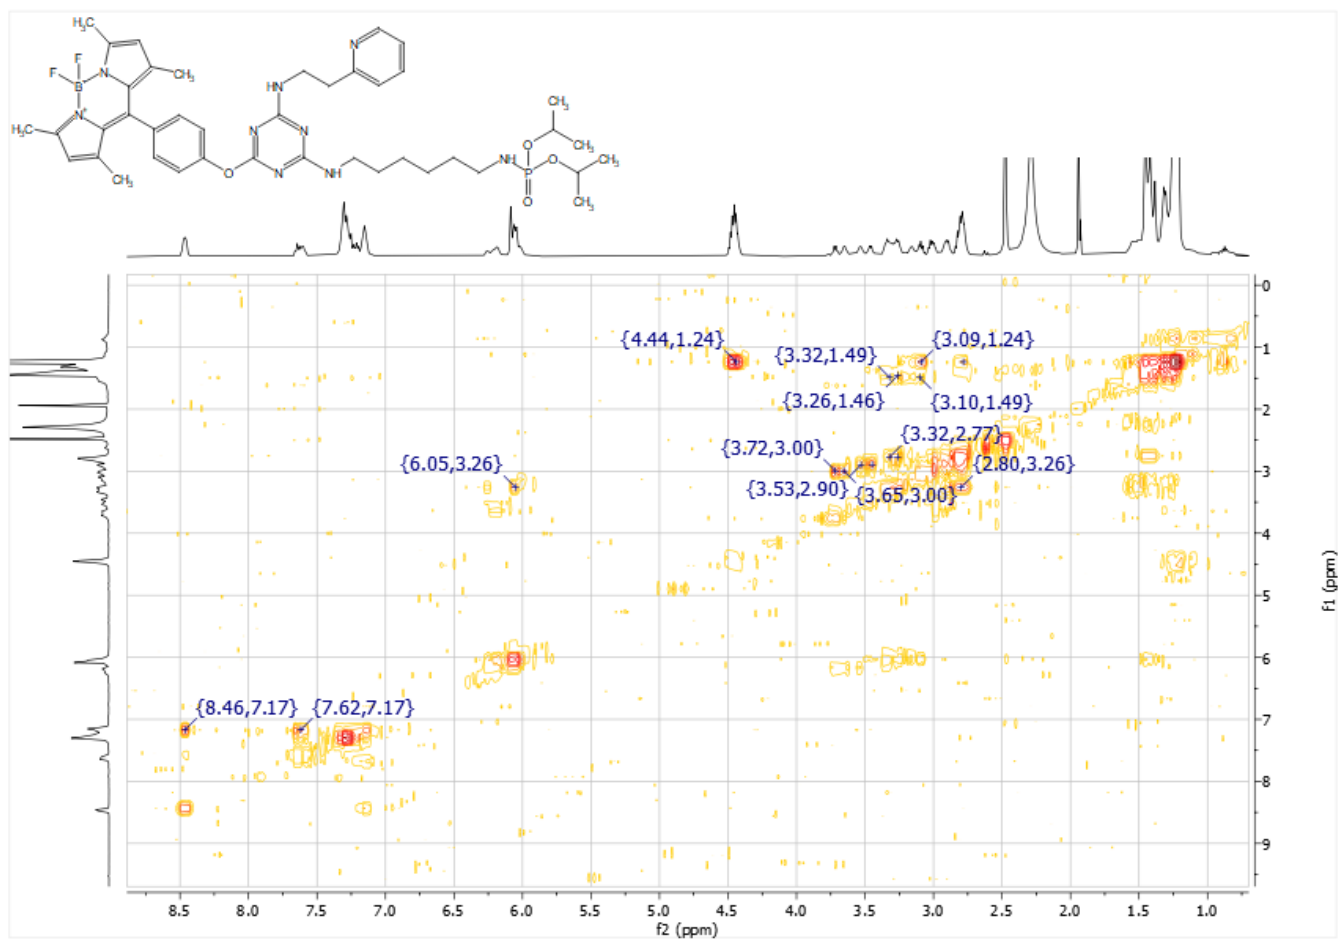

Figure S51 –  $^1\text{H}\times^1\text{H}$ -COSY spectrum of **5c**.

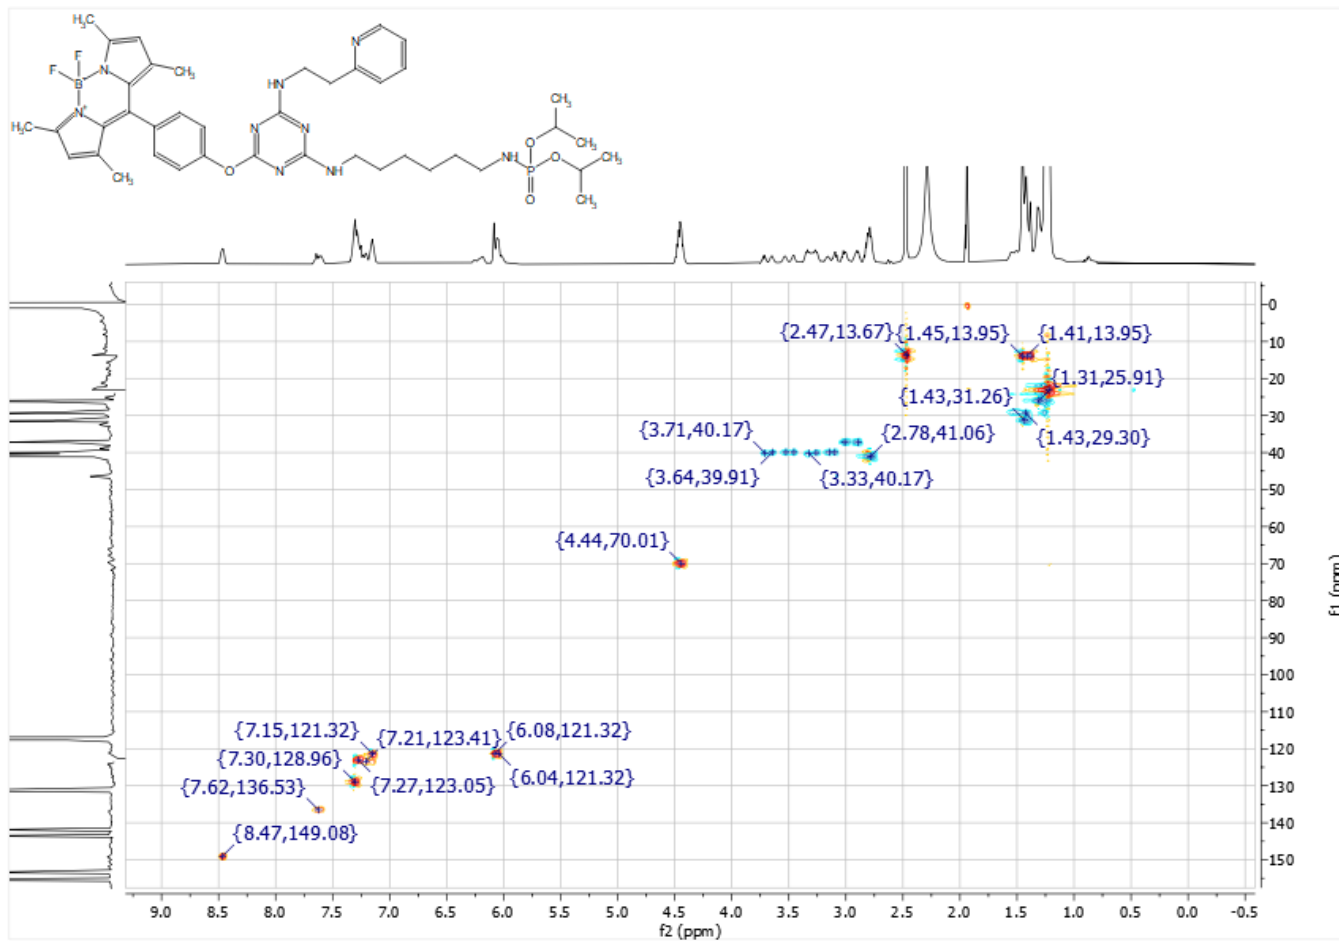

Figure S52 –  $^1\text{H}\times^{13}\text{C}$ -HSQC spectrum of **5c**.

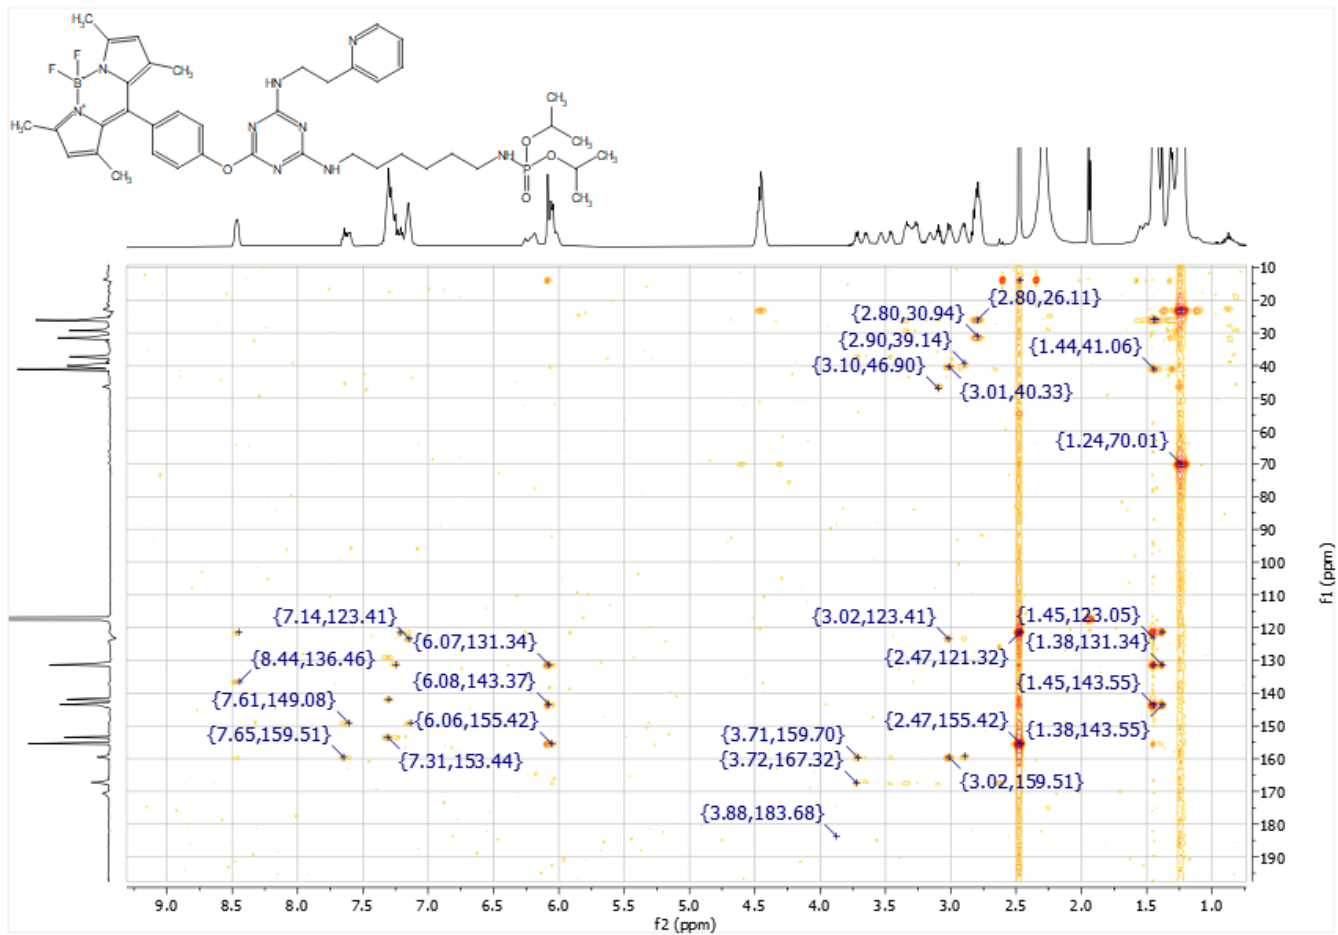

ure S53 –  $^1\text{H}\times^{13}\text{C}$ -HMBC spectrum of **5c**.

Fig

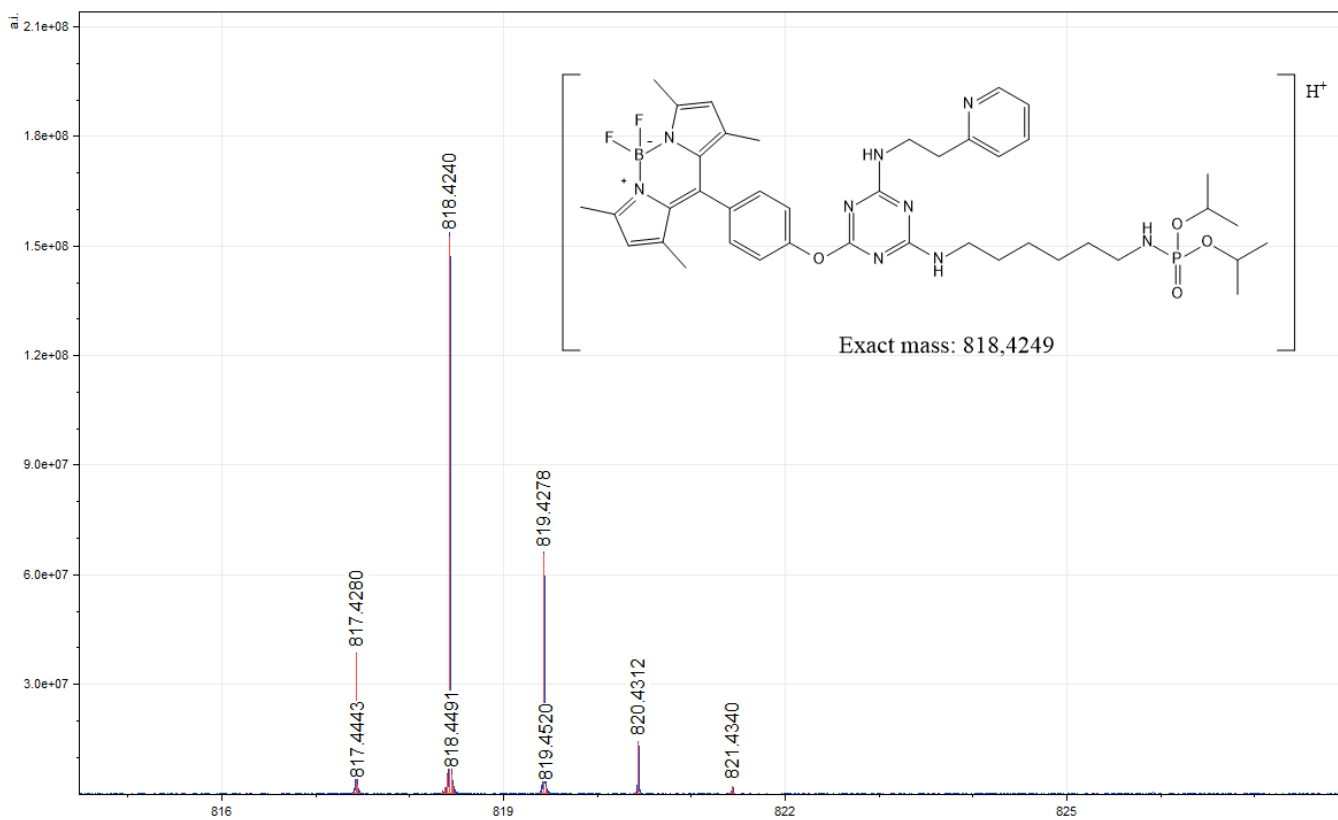

ure S54 – HRMS spectrum of **5c**.

Fig

## 2. THEORETICAL EVALUATIONS

### 2.1 Rotational isomerism

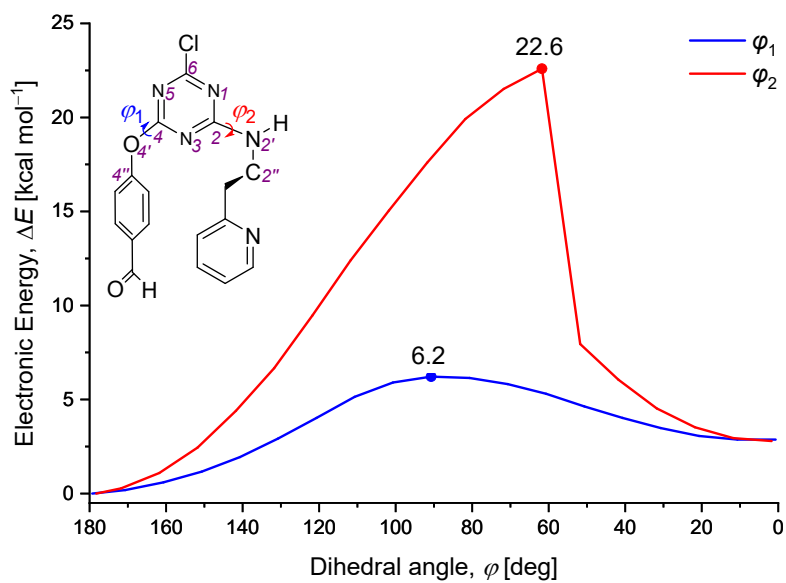

**Figure S55:** Evaluated dihedral angles for the bond rotations  $C_4-O_4$  ( $\varphi_1 = N_5-C_4-O_4-C_4'$ ) and  $C_2-N_2$  ( $\varphi_2 = N_1-C_2-O_2-C_2''$ ) of compound 3. Energy profile (in kcal mol<sup>-1</sup>) obtained from the relaxed scan of  $\varphi_1$  and  $\varphi_2$ , ranging from 180° to 0°, at B3LYP-D3/def2-TZVP/IEFPCM=dichloromethane level.

## 2.2 Conformational analysis

Due to the high flexibility of the nucleophiles, particularly the nitrogenates, a conformational search was conducted at the molecular mechanics level using the Monte Carlo method in SPARTAN'10 software, employing the MMFF force field. This approach facilitated the identification of the lowest energy conformations constituting the conformational distribution of the system. The most stable conformers identified were subsequently subjected to full optimization using the DFT B3LYP-D3/def2-TZVP level. Notably, only a single conformation was identified for the nucleophiles BODIPY-OH (I) and p-hydroxybenzaldehyde (IV). In the case of 2-(pyridin-2-yl)ethanamine (III), the most stable conformation (**ii**,  $\Delta H = -1.5$  kcal mol<sup>-1</sup>) featured a six-membered pseudo-ring with hydrogen bond (HB) donation from the -NH<sub>2</sub> unit (nucleophile site) to the pyridinic nitrogen — figure S56, (III). This suggests that the equilibrium is delocalized towards the most reactive conformation, characterized by the most nucleophilic -NH<sub>2</sub>. For aminoalkyl phosphoramidates (II), only the IIa (n=2) and IIc (n=6) were evaluated. Regarding IIa, the less reactive form was more populated (**iii**,  $\Delta H = -1.0$  kcal mol<sup>-1</sup>), wherein the nucleophile site exhibited an acceptor HB character. The most reactive form (**i**) was 0.7 kcal mol<sup>-1</sup> less stable, being less populated in the conformational equilibrium (figure S56, (IIa)). In the case of IIc, evaluated in the final substitution step, all conformers presented a linear chair conformation, with no intramolecular HB capable of stabilizing the system.

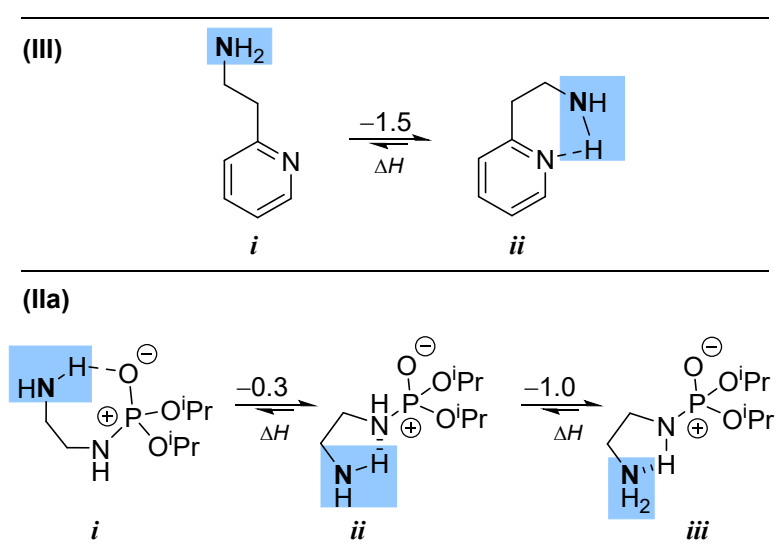

**Figure S56:** Bidimensional representation of the most stable conformer for the nitrogen nucleophiles depicting the intramolecular interactions obtained by DFT. Optimized structures at the B3LYP-D3/def2-TZVP/IEFPCM=dichloromethane level and nucleophilic site is highlighted in blue.

**Table S1:** Energies relative to isolated reactants (substrate + nucleophile) in kcal mol<sup>-1</sup> for the stationary points of nucleophilic aromatic substitution reactions, calculated at the B3LYP-D3/def2-TZVP/IEFPCM level of theory.

| Entry                      | Pre-reactive complex                                        | Transition state                                                                       | Final complex                                                  |
|----------------------------|-------------------------------------------------------------|----------------------------------------------------------------------------------------|----------------------------------------------------------------|
| <b>First substitution</b>  |                                                             |                                                                                        |                                                                |
| I                          | $\Delta E = -97.1; \Delta H = -96.0;$<br>$\Delta G = -84.3$ | $\Delta E^\ddagger = -94.4; \Delta H^\ddagger = -94.3;$<br>$\Delta G^\ddagger = -82.1$ | $\Delta E = -128.0; \Delta H = -125.4;$<br>$\Delta G = -115.1$ |
| IIa                        | $\Delta E = -97.0; \Delta H = -96.0;$<br>$\Delta G = -85.6$ | $\Delta E^\ddagger = -88.2; \Delta H^\ddagger = -87.6;$<br>$\Delta G^\ddagger = -73.4$ | $\Delta E = -105.7; \Delta H = -103.3;$<br>$\Delta G = -90.5$  |
| III                        | $\Delta E = -98.9; \Delta H = -98.0;$<br>$\Delta G = -87.7$ | $\Delta E^\ddagger = -92.1; \Delta H^\ddagger = -91.5;$<br>$\Delta G^\ddagger = -78.2$ | $\Delta E = -123.5; \Delta H = -123.6;$<br>$\Delta G = -112.6$ |
| IV                         | $\Delta E = -96.4; \Delta H = -95.5;$<br>$\Delta G = -84.3$ | $\Delta E^\ddagger = -89.3; \Delta H^\ddagger = -89.3;$<br>$\Delta G^\ddagger = -76.9$ | $\Delta E = -120.4; \Delta H = -118.1;$<br>$\Delta G = -108.1$ |
| <b>Second substitution</b> |                                                             |                                                                                        |                                                                |
| Via (IV)                   | $\Delta E = -7.4; \Delta H = -6.1; \Delta G$<br>$= 5.7$     | $\Delta E^\ddagger = 9.2; \Delta H^\ddagger = 9.4;$<br>$\Delta G^\ddagger = 21.0$      | $\Delta E = -28.7; \Delta H = -25.9; \Delta G$<br>$= -14.4$    |
| Via (III)                  | $\Delta E = -12.2; \Delta H = -10.8;$<br>$\Delta G = 1.3$   | $\Delta E^\ddagger = -2.7; \Delta H^\ddagger = -1.6;$<br>$\Delta G^\ddagger = 12.7$    | $\Delta E = -34.5; \Delta H = -34.3; \Delta G$<br>$= -22.8$    |
| <b>Third substitution</b>  |                                                             |                                                                                        |                                                                |
| IIc                        | $\Delta E = -12.6; \Delta H = -10.7;$<br>$\Delta G = 2.9$   | $\Delta E^\ddagger = 4.5; \Delta H^\ddagger = 5.9;$<br>$\Delta G^\ddagger = 21.9$      | $\Delta E = -30.5; \Delta H = -28.3; \Delta G$<br>$= -14.6$    |

### 2.3 Nucleophilic substitutions at cyanuric chloride

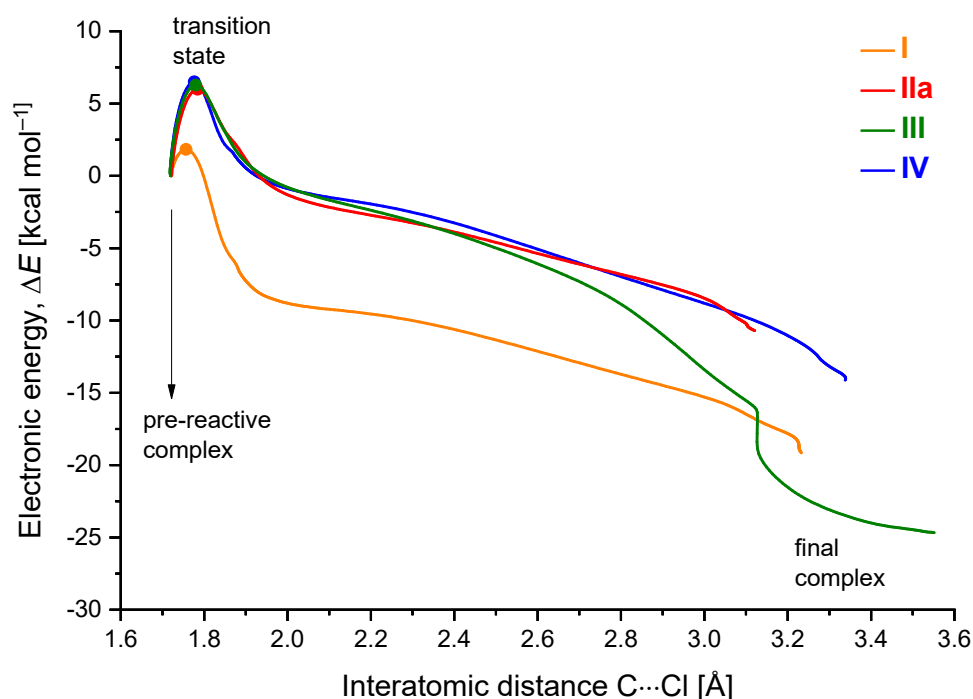

**Figure S57:** Minimum energy path along the interatomic distance carbon—nucleofuge (Cl) obtained from the intrinsic reaction coordinate calculations (at B3LYP-D3/def2-TZVP/IEFPCM=dichloromethane) for the first chlorine substitution.

(a) Reaction path with  $\pi\cdots\pi$  interaction nucleophile-electrophile

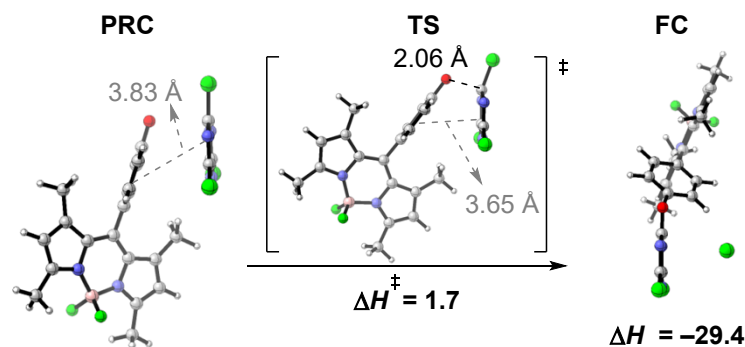

(b) Reaction path without  $\pi\cdots\pi$  interaction

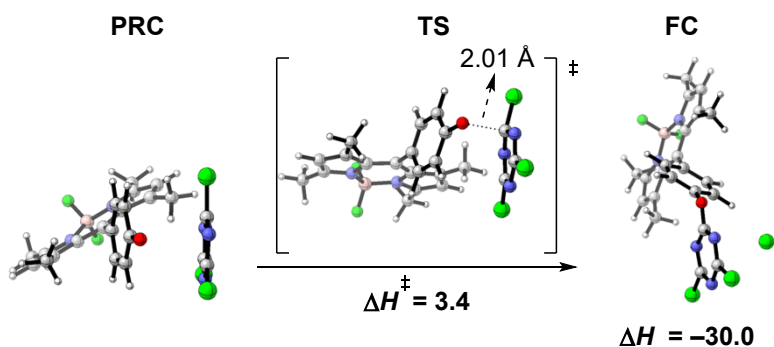

**Figure S58:** Optimized structures of the stationary points for the substitution with BODIPY (I) calculated (a) with and (b) without  $\pi_1\cdots\pi_{\text{electrophile}}$  interactions (in gray). Energy profile in terms of relative enthalpy (kcal mol<sup>-1</sup>) calculated at B3LYP-D3/def2-TZVP/IEFPCM=dichloromethane. PRC: Pre-reactive complex, TS: Transition state structure, FC: Final complex.

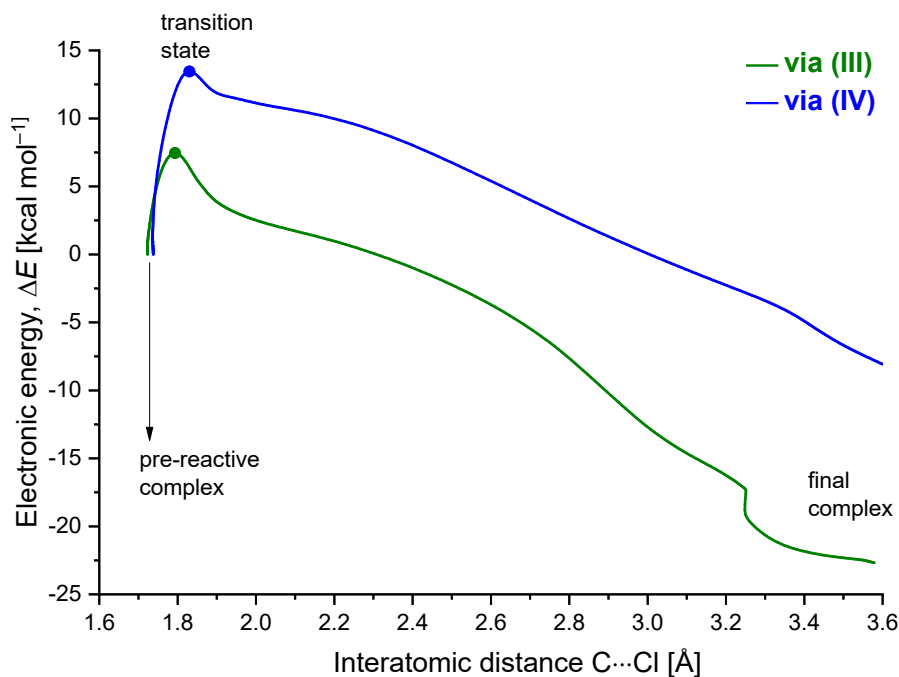

**Figure S59:** Minimum energy path along the interatomic distance carbon—nucleofuge (Cl) obtained from the intrinsic reaction coordinate calculations (at B3LYP-D3/def2-TZVP/IEFPCM=dichloromethane) for the second chlorine substitution.



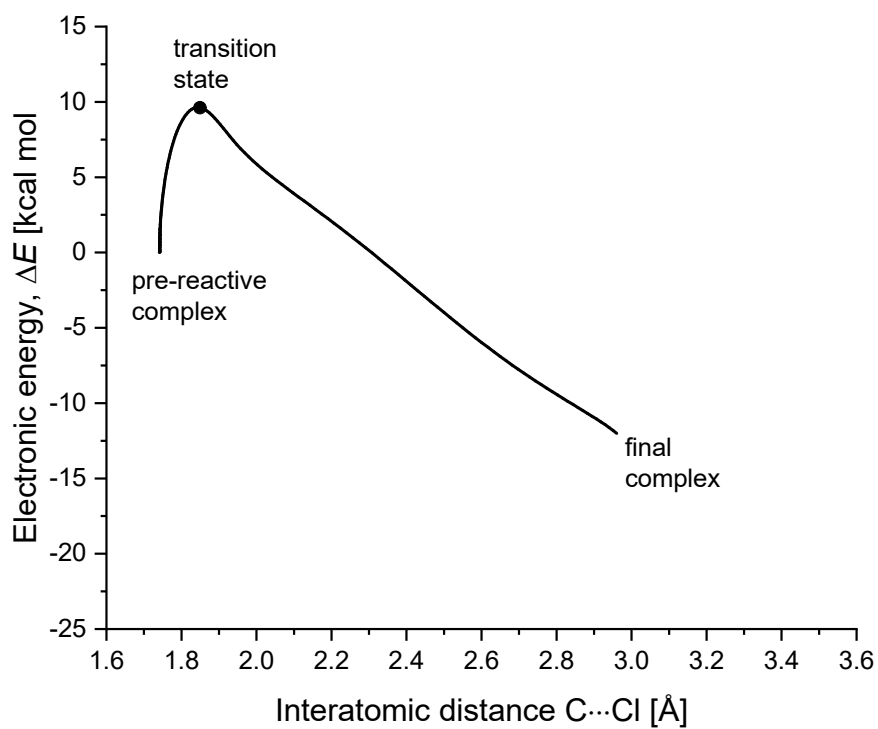

**Figure S60:** Minimum energy path along the interatomic distance carbon—nucleofuge (Cl) obtained from the intrinsic reaction coordinate (at B3LYP-D3/def2-TZVP/IEFPCM=tetrahydrofuran,) for the third chlorine substitution.

## 2.4 Cartesian coordinate matrices of relevant stationary points

Rotational isomerism:

Rotamer *a*

|    |              |              |              |   |              |              |              |
|----|--------------|--------------|--------------|---|--------------|--------------|--------------|
| N  | -3.708275000 | 1.003115000  | -0.203691000 | C | 2.304609000  | 2.597090000  | 0.276113000  |
| C  | -2.383145000 | 0.986383000  | -0.042962000 | C | 1.483218000  | 2.533745000  | 1.404381000  |
| N  | -1.628995000 | -0.060892000 | 0.209832000  | C | 0.112206000  | 2.381092000  | 1.266917000  |
| C  | -2.297779000 | -1.223993000 | 0.318071000  | C | 3.762029000  | 2.708515000  | 0.451151000  |
| N  | -3.641460000 | -1.338628000 | 0.170780000  | H | 4.097416000  | 2.804961000  | 1.501475000  |
| C  | -4.243669000 | -0.202576000 | -0.080938000 | O | 4.572279000  | 2.684527000  | -0.453113000 |
| Cl | -5.975688000 | -0.280052000 | -0.281488000 | H | -2.131894000 | -3.192453000 | 0.617819000  |
| O  | -1.802065000 | 2.191710000  | -0.172802000 | H | 0.149680000  | -1.501613000 | 1.322770000  |
| N  | -1.607009000 | -2.332715000 | 0.591582000  | H | 0.095072000  | -3.262907000 | 1.305084000  |
| C  | -0.159381000 | -2.368348000 | 0.739089000  | H | 0.339323000  | -3.293998000 | -1.145728000 |
| C  | 0.574986000  | -2.371594000 | -0.611783000 | H | 0.214496000  | -1.530944000 | -1.204863000 |
| C  | 2.062843000  | -2.263521000 | -0.416251000 | H | 2.163159000  | -0.169634000 | -0.888427000 |
| C  | 2.721101000  | -1.045190000 | -0.586701000 | H | 4.617233000  | -0.038053000 | -0.495784000 |
| C  | 4.088988000  | -0.973755000 | -0.363628000 | H | 5.826140000  | -2.122680000 | 0.212009000  |
| C  | 4.760129000  | -2.125176000 | 0.028464000  | H | 4.515551000  | -4.213358000 | 0.483848000  |
| C  | 4.024539000  | -3.294821000 | 0.179445000  | H | -0.090204000 | 2.309971000  | -2.123854000 |
| N  | 2.709111000  | -3.373155000 | -0.034043000 | H | 2.384921000  | 2.579475000  | -1.867224000 |
| C  | -0.421129000 | 2.292063000  | -0.009472000 | H | 1.921757000  | 2.596060000  | 2.392897000  |
| C  | 0.371430000  | 2.374204000  | -1.148183000 | H | -0.539269000 | 2.320221000  | 2.127378000  |
| C  | 1.738690000  | 2.526195000  | -1.001383000 |   |              |              |              |

$$E = -1541.1542052 \text{ a. u.}$$

$$H = -1540.839169 \text{ a. u.}$$

$$G = -1540.915144 \text{ a. u.}$$

Transition state

|    |              |              |              |   |              |              |              |
|----|--------------|--------------|--------------|---|--------------|--------------|--------------|
| N  | -0.654715000 | 2.998480000  | -0.577890000 | C | -4.573468000 | -1.862773000 | -0.265525000 |
| C  | -1.240833000 | 1.856203000  | -0.222584000 | C | -3.420360000 | -1.862834000 | -1.054846000 |
| N  | -0.749653000 | 0.952204000  | 0.617102000  | C | -2.682806000 | -0.701000000 | -1.220242000 |
| C  | 0.442496000  | 1.246339000  | 1.126694000  | C | -5.339210000 | -3.111748000 | -0.104366000 |
| N  | 1.126998000  | 2.362047000  | 0.839823000  | H | -4.919279000 | -3.985195000 | -0.639360000 |
| C  | 0.518742000  | 3.177186000  | -0.003844000 | O | -6.353729000 | -3.222718000 | 0.552180000  |
| Cl | 1.355877000  | 4.644866000  | -0.403715000 | H | 1.108249000  | 0.733148000  | 2.926037000  |
| O  | -2.434128000 | 1.654928000  | -0.787625000 | H | 3.036137000  | 0.610741000  | 1.369418000  |
| N  | 1.013378000  | 0.302255000  | 2.011192000  | H | 2.733180000  | -0.792463000 | 2.401047000  |
| C  | 2.332377000  | -0.204066000 | 1.576385000  | H | 1.501470000  | -1.906663000 | 0.565271000  |
| C  | 2.196102000  | -1.095648000 | 0.339335000  | H | 1.776335000  | -0.519625000 | -0.488676000 |
| C  | 3.528558000  | -1.669163000 | -0.064384000 | H | 3.838719000  | -0.339514000 | -1.726480000 |
| C  | 4.248600000  | -1.153561000 | -1.142737000 | H | 6.062280000  | -1.313013000 | -2.287185000 |
| C  | 5.487981000  | -1.696630000 | -1.453447000 | H | 6.933038000  | -3.196977000 | -0.879946000 |
| C  | 5.974103000  | -2.739810000 | -0.676351000 | H | 5.536333000  | -4.004387000 | 1.008021000  |
| C  | 5.190744000  | -3.189810000 | 0.379891000  | H | -4.555998000 | 1.407099000  | 0.676779000  |
| N  | 3.999201000  | -2.674341000 | 0.686344000  | H | -5.883861000 | -0.695243000 | 0.967029000  |
| C  | -3.112072000 | 0.450930000  | -0.580030000 | H | -3.100709000 | -2.776217000 | -1.541699000 |
| C  | -4.257599000 | 0.481778000  | 0.203758000  | H | -1.788059000 | -0.681364000 | -1.826278000 |
| C  | -4.988581000 | -0.682937000 | 0.360082000  |   |              |              |              |

$$E = -1541.1179898 \text{ a. u.}$$

$$H = -1540.805072 \text{ a. u.}$$

$$G = -1540.881297 \text{ a. u.}$$

$$f = 72.2226i$$

Rotamer *b*

|    |              |              |              |   |              |              |              |
|----|--------------|--------------|--------------|---|--------------|--------------|--------------|
| N  | 0.846805000  | 2.788729000  | 0.048663000  | C | 5.458674000  | -1.433531000 | 0.210937000  |
| C  | 1.522935000  | 1.632333000  | 0.043023000  | C | 4.998526000  | -0.914801000 | 1.422898000  |
| N  | 1.028720000  | 0.428629000  | -0.131679000 | C | 4.101944000  | 0.144385000  | 1.438066000  |
| C  | -0.307734000 | 0.393118000  | -0.329544000 | C | 6.408890000  | -2.558994000 | 0.221991000  |
| N  | -1.097367000 | 1.490931000  | -0.342370000 | H | 6.692800000  | -2.915342000 | 1.231116000  |
| C  | -0.446382000 | 2.614447000  | -0.150091000 | O | 6.871066000  | -3.087196000 | -0.768344000 |
| Cl | -1.414619000 | 4.067057000  | -0.154834000 | H | -0.250151000 | -1.594530000 | -0.463354000 |
| O  | 2.841180000  | 1.785923000  | 0.251458000  | H | -2.695393000 | -0.246200000 | -1.349255000 |
| N  | -0.868258000 | -0.801391000 | -0.529589000 | H | -2.416196000 | -1.981434000 | -1.215109000 |
| C  | -2.294547000 | -1.027438000 | -0.704374000 | H | -2.654005000 | -1.844046000 | 1.256885000  |
| C  | -3.059809000 | -1.048800000 | 0.628502000  | H | -2.904260000 | -0.097673000 | 1.138424000  |
| C  | -4.527548000 | -1.289845000 | 0.400480000  | H | -5.123213000 | 0.753639000  | 0.707923000  |
| C  | -5.452941000 | -0.247501000 | 0.462605000  | H | -7.526865000 | 0.280080000  | 0.253299000  |
| C  | -6.791394000 | -0.513031000 | 0.207326000  | H | -8.197755000 | -2.069135000 | -0.310905000 |
| C  | -7.167133000 | -1.812757000 | -0.105779000 | H | -6.433776000 | -3.815394000 | -0.388712000 |
| C  | -6.178182000 | -2.788480000 | -0.148699000 | H | 3.770236000  | 0.622651000  | -1.909985000 |
| N  | -4.889672000 | -2.543684000 | 0.095564000  | H | 5.383554000  | -1.286924000 | -1.928538000 |
| C  | 3.675415000  | 0.670109000  | 0.229746000  | H | 5.343500000  | -1.341688000 | 2.356905000  |
| C  | 4.124243000  | 0.176776000  | -0.990801000 | H | 3.733676000  | 0.563085000  | 2.364299000  |
| C  | 5.016177000  | -0.879222000 | -0.996259000 |   |              |              |              |

$E = -1541.1497637$  a. u.

$H = -1540.834915$  a. u.

$G = -1540.913115$  a. u.

First substitution: **nucleophile BODIPY-OH (I)**

Pre-reactive complex with  $\pi$ - $\pi$  interaction (I):

|    |              |              |              |    |              |              |              |
|----|--------------|--------------|--------------|----|--------------|--------------|--------------|
| B  | -4.637338000 | -0.429475000 | 0.206852000  | H  | -0.891367000 | 3.892808000  | -0.120785000 |
| F  | -5.675268000 | -0.572522000 | -0.740835000 | C  | -6.241810000 | 2.149855000  | 0.540040000  |
| F  | -5.174687000 | -0.699920000 | 1.485141000  | H  | -6.432201000 | 1.642393000  | 1.487259000  |
| Cl | 2.474244000  | -0.286453000 | 2.969520000  | H  | -6.822621000 | 1.627928000  | -0.222742000 |
| C  | 3.984772000  | -1.415895000 | -0.336143000 | H  | -6.595936000 | 3.177132000  | 0.610703000  |
| N  | 4.420540000  | 0.504220000  | 1.425203000  | C  | -2.143833000 | -1.048578000 | -0.284137000 |
| C  | 5.144021000  | 0.350519000  | 0.324635000  | C  | -1.382083000 | -2.250946000 | -0.279451000 |
| O  | 3.517346000  | 1.996907000  | -1.212217000 | C  | -2.298010000 | -3.294019000 | -0.141303000 |
| C  | 2.330036000  | 1.595151000  | -1.010644000 | H  | -2.063075000 | -4.346310000 | -0.099325000 |
| C  | 1.585023000  | 1.950478000  | 0.166861000  | C  | -3.577764000 | -2.749080000 | -0.030635000 |
| H  | 2.083069000  | 2.564997000  | 0.907366000  | C  | 0.096528000  | -2.452579000 | -0.332888000 |
| C  | 0.289391000  | 1.536623000  | 0.361952000  | H  | 0.347995000  | -3.433909000 | 0.072108000  |
| H  | -0.242289000 | 1.843528000  | 1.255516000  | H  | 0.634215000  | -1.697117000 | 0.235502000  |
| C  | -0.370557000 | 0.699041000  | -0.557947000 | H  | 0.487860000  | -2.407998000 | -1.350374000 |
| C  | 0.351073000  | 0.300525000  | -1.700068000 | C  | -4.865377000 | -3.467305000 | 0.180061000  |
| C  | 1.634564000  | 0.736105000  | -1.932732000 | H  | -5.296378000 | -3.211747000 | 1.149963000  |
| H  | 2.158667000  | 0.445065000  | -2.835736000 | H  | -4.704670000 | -4.543415000 | 0.138263000  |
| C  | -1.762469000 | 0.310877000  | -0.346564000 | H  | -5.599244000 | -3.186879000 | -0.577205000 |
| C  | -2.742719000 | 1.319088000  | -0.187157000 | N  | -4.059785000 | 0.995989000  | 0.156104000  |
| C  | -2.690332000 | 2.725477000  | -0.399125000 | N  | -3.487815000 | -1.404340000 | -0.110397000 |
| C  | -3.970179000 | 3.209630000  | -0.124593000 | N  | 3.191533000  | -1.389915000 | 0.724996000  |
| H  | -4.289495000 | 4.238332000  | -0.188602000 | C  | 3.461150000  | -0.396150000 | 1.556856000  |
| C  | -4.790315000 | 2.130934000  | 0.207195000  | N  | 4.988151000  | -0.596734000 | -0.591486000 |
| C  | -1.576826000 | 3.582656000  | -0.911421000 | H  | -0.139175000 | -0.335310000 | -2.428418000 |
| H  | -1.992156000 | 4.484555000  | -1.364041000 | Cl | 3.689008000  | -2.669542000 | -1.488962000 |
| H  | -0.976168000 | 3.060766000  | -1.655348000 | Cl | 6.476537000  | 1.421307000  | 0.116085000  |

$$E = -2804.3248 \text{ a. u.}$$

$$H = -2803.9215 \text{ a. u.}$$

$$G = -2804.0196 \text{ a. u.}$$

Transition state with  $\pi$ - $\pi$  interaction (I):

|    |              |              |              |    |              |              |              |
|----|--------------|--------------|--------------|----|--------------|--------------|--------------|
| B  | -4.688945000 | 0.481184000  | -0.038442000 | H  | -0.993232000 | -3.692287000 | -0.692028000 |
| F  | -5.536655000 | 0.696462000  | 1.066541000  | C  | -6.406294000 | -2.051272000 | -0.121252000 |
| F  | -5.420509000 | 0.734825000  | -1.215360000 | H  | -6.734083000 | -1.551638000 | -1.034834000 |
| Cl | 3.192341000  | 1.284988000  | -2.894747000 | H  | -6.827259000 | -1.491263000 | 0.715577000  |
| C  | 3.856031000  | 1.226178000  | 0.858025000  | H  | -6.804681000 | -3.064078000 | -0.108223000 |
| N  | 4.487529000  | -0.252819000 | -1.233227000 | C  | -2.125568000 | 0.988066000  | 0.078159000  |
| C  | 4.835544000  | -0.594505000 | 0.026930000  | C  | -1.301844000 | 2.152860000  | 0.059519000  |
| O  | 3.533773000  | -2.146466000 | 0.381189000  | C  | -2.168682000 | 3.238144000  | 0.022941000  |
| C  | 2.299879000  | -1.725331000 | 0.312071000  | H  | -1.888372000 | 4.279484000  | -0.001519000 |
| C  | 1.590597000  | -1.699196000 | -0.914889000 | C  | -3.485474000 | 2.756164000  | 0.009606000  |
| H  | 2.101577000  | -2.044388000 | -1.804558000 | C  | 0.186672000  | 2.251799000  | 0.050750000  |
| C  | 0.279377000  | -1.259587000 | -0.981496000 | H  | 0.492709000  | 3.282919000  | -0.123887000 |
| H  | -0.243860000 | -1.270480000 | -1.930724000 | H  | 0.632245000  | 1.626160000  | -0.720693000 |
| C  | -0.384829000 | -0.802848000 | 0.159109000  | H  | 0.625090000  | 1.926705000  | 0.994220000  |
| C  | 0.306216000  | -0.791683000 | 1.373635000  | C  | -4.746481000 | 3.544641000  | -0.039063000 |
| C  | 1.612382000  | -1.244177000 | 1.454782000  | H  | -5.314971000 | 3.309090000  | -0.940716000 |
| H  | 2.136917000  | -1.246248000 | 2.401838000  | H  | -4.523934000 | 4.610022000  | -0.028520000 |
| C  | -1.803648000 | -0.373722000 | 0.091511000  | H  | -5.386108000 | 3.305233000  | 0.812294000  |
| C  | -2.815682000 | -1.343090000 | 0.045735000  | N  | -4.162264000 | -0.969815000 | -0.036052000 |
| C  | -2.765322000 | -2.767007000 | 0.104400000  | N  | -3.459889000 | 1.411038000  | 0.039596000  |
| C  | -4.084109000 | -3.203447000 | 0.042697000  | N  | 3.394688000  | 1.641359000  | -0.318512000 |
| H  | -4.419965000 | -4.228321000 | 0.065617000  | C  | 3.751545000  | 0.824684000  | -1.305292000 |
| C  | -4.920560000 | -2.082186000 | -0.041884000 | N  | 4.598952000  | 0.181415000  | 1.108645000  |
| C  | -1.580892000 | -3.669849000 | 0.227152000  | H  | -0.196061000 | -0.435379000 | 2.265704000  |
| H  | -1.912535000 | -4.685758000 | 0.443265000  | Cl | 3.445954000  | 2.237118000  | 2.222849000  |
| H  | -0.903559000 | -3.346605000 | 1.017509000  | Cl | 6.253638000  | -1.623577000 | 0.151293000  |

$$E = -2804.3206 \text{ a. u.}$$

$$H = -2803.9188 \text{ a. u.}$$

$$G = -2804.0161 \text{ a. u.}$$

$$f = 192.2337i$$

Final complex with  $\pi$ - $\pi$  interaction (I):

|    |              |              |              |   |              |              |              |
|----|--------------|--------------|--------------|---|--------------|--------------|--------------|
| B  | 5.271376000  | 0.423683000  | -0.166759000 | C | -1.280109000 | -0.922062000 | -0.491191000 |
| F  | 5.918087000  | 0.641004000  | -1.396408000 | H | -1.970664000 | -0.979966000 | -1.325564000 |
| F  | 6.214934000  | 0.563887000  | 0.868195000  | C | 2.365432000  | -0.231095000 | 0.222612000  |
| Cl | -7.859954000 | -0.889519000 | 0.437319000  | C | 3.286788000  | -1.267627000 | 0.053867000  |
| C  | -4.817414000 | 1.358478000  | 0.023953000  | C | 3.124287000  | -2.685285000 | 0.019817000  |
| N  | -5.288209000 | -1.133195000 | 0.756288000  | C | 4.391807000  | -3.212694000 | -0.185148000 |
| C  | -4.061101000 | -0.614784000 | 0.687373000  | H | 4.644067000  | -4.258193000 | -0.265899000 |
| O  | -3.088325000 | -1.457990000 | 1.016707000  | C | 5.306785000  | -2.151876000 | -0.275027000 |
| C  | -1.748600000 | -1.105348000 | 0.799832000  | C | 1.875867000  | -3.494089000 | 0.162336000  |
| C  | -0.918141000 | -1.035015000 | 1.903459000  | H | 2.109774000  | -4.554688000 | 0.073787000  |
| H  | -1.322512000 | -1.191892000 | 2.894072000  | H | 1.140303000  | -3.240004000 | -0.601868000 |
| C  | 0.429451000  | -0.755895000 | 1.709097000  | H | 1.393507000  | -3.328369000 | 1.126675000  |
| H  | 1.093942000  | -0.691651000 | 2.560754000  | C | 6.775977000  | -2.227839000 | -0.494660000 |
| C  | 0.927476000  | -0.551936000 | 0.424800000  | H | 7.314549000  | -1.734378000 | 0.316240000  |
| C  | 0.066681000  | -0.641249000 | -0.669035000 | H | 7.054000000  | -1.716556000 | -1.418209000 |

|   |              |              |              |    |              |              |              |
|---|--------------|--------------|--------------|----|--------------|--------------|--------------|
| H | 7.094763000  | -3.266667000 | -0.554139000 | H  | 6.244363000  | 3.175331000  | 0.647687000  |
| C | 2.771504000  | 1.105350000  | 0.204021000  | H  | 5.395991000  | 4.554856000  | -0.079830000 |
| C | 2.038155000  | 2.322981000  | 0.343224000  | H  | 5.992750000  | 3.220404000  | -1.087727000 |
| C | 2.970286000  | 3.346068000  | 0.238037000  | N  | 4.644927000  | -0.989532000 | -0.132226000 |
| H | 2.767582000  | 4.403889000  | 0.294336000  | N  | 4.118003000  | 1.436986000  | 0.019779000  |
| C | 4.238003000  | 2.776488000  | 0.040004000  | N  | -6.081760000 | 0.964806000  | 0.001769000  |
| C | 0.572267000  | 2.524336000  | 0.553723000  | C  | -6.231909000 | -0.294297000 | 0.393993000  |
| H | 0.354959000  | 3.588078000  | 0.646326000  | N  | -3.769825000 | 0.644082000  | 0.372090000  |
| H | 0.218346000  | 2.021012000  | 1.454064000  | H  | 0.452033000  | -0.485583000 | -1.668348000 |
| H | -0.014726000 | 2.127098000  | -0.275323000 | Cl | -4.515485000 | 3.000630000  | -0.440343000 |
| C | 5.539099000  | 3.477181000  | -0.128870000 | Cl | -4.207385000 | -0.918288000 | -2.680751000 |

$E = -2804.3741$  a. u.

$H = -2803.9684$  a. u.

$G = -2804.0686$  a. u.

### First substitution: nucleophile aminoalkyl phosphoramidate (IIa)

#### Pre-reactive complex (IIa):

|   |              |              |              |    |              |              |              |
|---|--------------|--------------|--------------|----|--------------|--------------|--------------|
| P | 1.962202000  | -0.216671000 | 0.378014000  | H  | 2.131174000  | 4.032273000  | -1.217511000 |
| O | 1.598627000  | -0.935695000 | 1.617279000  | H  | 0.849974000  | 2.864080000  | -0.867134000 |
| O | 2.320335000  | 1.288913000  | 0.723128000  | H  | 1.561118000  | 3.815510000  | 0.446916000  |
| O | 3.189140000  | -0.855180000 | -0.406815000 | H  | 4.570945000  | 3.479908000  | -0.462073000 |
| N | 0.858294000  | -0.108209000 | -0.843616000 | H  | 4.856500000  | 1.971084000  | 0.419794000  |
| C | 0.409721000  | -1.273163000 | -1.620561000 | H  | 3.982439000  | 3.299871000  | 1.200063000  |
| C | -0.158202000 | -2.431006000 | -0.795163000 | H  | 4.297172000  | -1.218819000 | 1.315400000  |
| N | -1.161666000 | -1.960631000 | 0.166838000  | H  | 4.700413000  | -3.629375000 | 0.780585000  |
| C | 2.829837000  | 2.231533000  | -0.273179000 | H  | 2.973175000  | -3.237807000 | 0.810706000  |
| C | 1.775325000  | 3.299925000  | -0.490867000 | H  | 3.814874000  | -3.425345000 | -0.741382000 |
| C | 4.142101000  | 2.777779000  | 0.254778000  | H  | 5.733446000  | -0.186781000 | -0.425255000 |
| C | 4.250620000  | -1.584146000 | 0.287223000  | H  | 5.487366000  | -1.592421000 | -1.475688000 |
| C | 3.910570000  | -3.062847000 | 0.284163000  | H  | 6.378125000  | -1.767031000 | 0.046151000  |
| C | 5.541782000  | -1.259873000 | -0.437309000 | N  | -3.229494000 | 0.232210000  | 1.424122000  |
| H | 0.113806000  | 0.550966000  | -0.654708000 | C  | -2.235494000 | 0.941968000  | 0.917131000  |
| H | -0.351413000 | -0.907787000 | -2.309542000 | N  | -2.004688000 | 1.163431000  | -0.369872000 |
| H | 1.246260000  | -1.636884000 | -2.220169000 | C  | -2.883259000 | 0.583799000  | -1.173918000 |
| H | -0.631433000 | -3.131878000 | -1.486786000 | N  | -3.914147000 | -0.157561000 | -0.806773000 |
| H | 0.667064000  | -2.966056000 | -0.309519000 | C  | -4.020155000 | -0.301507000 | 0.505652000  |
| H | -0.677637000 | -1.590645000 | 0.979842000  | Cl | -5.317832000 | -1.280737000 | 1.074816000  |
| H | -1.714005000 | -2.742127000 | 0.499996000  | Cl | -1.116808000 | 1.631435000  | 2.025631000  |
| H | 3.001615000  | 1.682747000  | -1.201254000 | Cl | -2.653830000 | 0.818880000  | -2.865740000 |

$E = -2653.8664$  a. u.

$H = -2653.4959$  a. u.

$G = -2653.5869$  a. u.

#### Transition state (IIa):

|   |              |              |              |   |              |              |              |
|---|--------------|--------------|--------------|---|--------------|--------------|--------------|
| P | -2.640440000 | -0.488553000 | 0.704486000  | N | 0.738030000  | -1.520281000 | -0.611898000 |
| O | -3.373148000 | -0.110292000 | 1.930169000  | C | -4.866950000 | 0.101740000  | -0.667045000 |
| O | -3.542826000 | -0.519836000 | -0.600317000 | C | -4.721088000 | 1.526316000  | -1.169772000 |
| O | -1.397305000 | 0.477346000  | 0.422136000  | C | -5.705847000 | -0.774735000 | -1.574894000 |
| N | -1.912914000 | -1.954122000 | 0.593291000  | C | -1.348546000 | 1.853491000  | 0.930239000  |
| C | -0.681816000 | -2.315918000 | 1.281565000  | C | -0.390712000 | 1.892612000  | 2.103946000  |
| C | 0.458846000  | -2.629964000 | 0.316316000  | C | -0.930867000 | 2.735961000  | -0.228045000 |

|   |              |              |              |   |              |             |              |
|---|--------------|--------------|--------------|---|--------------|-------------|--------------|
| H | -2.424387000 | -2.692883000 | 0.137983000  | H | -0.346097000 | 2.902510000 | 2.514800000  |
| H | -0.388355000 | -1.485762000 | 1.925347000  | H | -0.720873000 | 1.213703000 | 2.890163000  |
| H | -0.840604000 | -3.178071000 | 1.932818000  | H | 0.613394000  | 1.610617000 | 1.786101000  |
| H | 1.364548000  | -2.823683000 | 0.896409000  | H | -1.635589000 | 2.647697000 | -1.055039000 |
| H | 0.237525000  | -3.523126000 | -0.266044000 | H | 0.061600000  | 2.456811000 | -0.582965000 |
| H | 0.302413000  | -0.651468000 | -0.304803000 | H | -0.897727000 | 3.778366000 | 0.092219000  |
| H | 0.411954000  | -1.704243000 | -1.554094000 | N | 2.900240000  | 1.428727000 | 0.185649000  |
| H | -5.277900000 | 0.102210000  | 0.343387000  | C | 3.084273000  | 0.326899000 | 0.909607000  |

|   |              |              |              |
|---|--------------|--------------|--------------|
| H | -5.704413000 | 1.990388000  | -1.260859000 |
| H | -4.126626000 | 2.126806000  | -0.480388000 |
| H | -4.238632000 | 1.536907000  | -2.148817000 |
| H | -6.717325000 | -0.372311000 | -1.647744000 |
| H | -5.764482000 | -1.789929000 | -1.181448000 |
| H | -5.274367000 | -0.811115000 | -2.577035000 |
| H | -2.351872000 | 2.116549000  | 1.267667000  |

$E = -2653.8525$  a. u.

$H = -2653.4825$  a. u.

$G = -2653.5675$  a. u.

$f = 227.917i$

|    |             |              |              |
|----|-------------|--------------|--------------|
| N  | 3.045327000 | -0.915923000 | 0.507763000  |
| C  | 2.659169000 | -1.057067000 | -0.788363000 |
| N  | 2.606428000 | -0.019537000 | -1.668917000 |
| C  | 2.699673000 | 1.152439000  | -1.103368000 |
| Cl | 2.571543000 | 2.535960000  | -2.153795000 |
| Cl | 3.444119000 | 0.588258000  | 2.593226000  |
| Cl | 3.199283000 | -2.589047000 | -1.522560000 |

### Final complex (IIa):

|   |              |              |              |    |              |              |              |
|---|--------------|--------------|--------------|----|--------------|--------------|--------------|
| P | -2.181834000 | -0.017177000 | -0.375097000 | H  | -3.581058000 | 4.041644000  | 1.044718000  |
| O | -1.541159000 | -0.664266000 | -1.562322000 | H  | -2.032689000 | 3.200400000  | 0.914891000  |
| O | -2.861315000 | 1.326062000  | -0.817718000 | H  | -2.750622000 | 3.962110000  | -0.518452000 |
| O | -3.230841000 | -0.938411000 | 0.356085000  | H  | -5.698161000 | 2.937254000  | -0.013767000 |
| N | -1.151676000 | 0.359590000  | 0.855153000  | H  | -5.507172000 | 1.402881000  | -0.875156000 |
| C | -0.395289000 | -0.658860000 | 1.598356000  | H  | -4.859489000 | 2.896912000  | -1.574375000 |
| C | 0.151729000  | -1.844383000 | 0.801661000  | H  | -4.235890000 | -1.463780000 | -1.394320000 |
| N | 0.767758000  | -1.464746000 | -0.542347000 | H  | -4.140115000 | -3.929053000 | -0.925601000 |
| C | -3.712878000 | 2.131720000  | 0.078683000  | H  | -2.534535000 | -3.190612000 | -0.966241000 |
| C | -2.968531000 | 3.411657000  | 0.398106000  | H  | -3.293934000 | -3.585900000 | 0.592377000  |
| C | -5.025641000 | 2.352758000  | -0.643278000 | H  | -5.860575000 | -0.814818000 | 0.363592000  |
| C | -4.121637000 | -1.853219000 | -0.380445000 | H  | -5.334036000 | -2.177628000 | 1.367558000  |
| C | -3.477294000 | -3.224537000 | -0.421096000 | H  | -6.162366000 | -2.475404000 | -0.170138000 |
| C | -5.451849000 | -1.824921000 | 0.341574000  | N  | 4.018340000  | 0.993622000  | -0.474152000 |
| H | -0.570863000 | 1.156103000  | 0.625000000  | C  | 2.810252000  | 1.399203000  | -0.120607000 |
| H | 0.435774000  | -0.159742000 | 2.089948000  | N  | 1.705738000  | 0.664589000  | -0.138459000 |
| H | -1.026500000 | -1.089741000 | 2.377151000  | C  | 1.916687000  | -0.577196000 | -0.521391000 |
| H | 0.924674000  | -2.336419000 | 1.386829000  | N  | 3.047080000  | -1.107639000 | -0.939776000 |
| H | -0.633455000 | -2.548010000 | 0.533978000  | C  | 4.071480000  | -0.265532000 | -0.880076000 |
| H | -0.047388000 | -1.061003000 | -1.118466000 | Cl | 5.600024000  | -0.863419000 | -1.381469000 |
| H | 1.069474000  | -2.325312000 | -1.002506000 | Cl | 2.645683000  | 3.026798000  | 0.402079000  |
| H | -3.876849000 | 1.551959000  | 0.988781000  | Cl | 3.049408000  | -1.099809000 | 2.465299000  |

$E = -2653.50752$  a. u.

$H = -2653.59475$  a. u.

$G = -2653.880272$  a. u.

### First substitution: nucleophile 2-(pyridin-2-yl)ethanamine (III)

#### Pre-reactive complex (III):

|   |              |              |             |   |              |              |             |
|---|--------------|--------------|-------------|---|--------------|--------------|-------------|
| N | -1.273818000 | -1.505252000 | 0.412692000 | C | -0.759565000 | -0.517704000 | 1.129741000 |
|---|--------------|--------------|-------------|---|--------------|--------------|-------------|

|    |              |              |              |   |              |              |              |
|----|--------------|--------------|--------------|---|--------------|--------------|--------------|
| N  | -1.266751000 | 0.696075000  | 1.275599000  | C | 2.168535000  | 1.795852000  | -1.645844000 |
| C  | -2.382411000 | 0.886342000  | 0.589050000  | C | 0.662271000  | 1.859137000  | -1.307074000 |
| N  | -3.014114000 | -0.008311000 | -0.153902000 | N | -0.131011000 | 0.705931000  | -1.738709000 |
| C  | -2.401185000 | -1.179771000 | -0.200734000 | H | 4.833918000  | 0.226460000  | 1.858608000  |
| Cl | -3.141067000 | -2.405413000 | -1.162192000 | H | 4.505632000  | -2.136615000 | 1.085396000  |
| Cl | 0.728265000  | -0.838120000 | 1.936329000  | H | 3.111812000  | -2.534308000 | -0.930768000 |
| Cl | -3.083590000 | 2.458860000  | 0.674552000  | H | 3.753821000  | 2.060507000  | 0.570780000  |
| C  | 4.237906000  | 0.005665000  | 0.982107000  | H | 2.619011000  | 2.766124000  | -1.425248000 |
| C  | 4.058556000  | -1.304980000 | 0.557775000  | H | 2.283588000  | 1.607481000  | -2.715953000 |
| C  | 3.281487000  | -1.524762000 | -0.571406000 | H | 0.553872000  | 1.973315000  | -0.224790000 |
| N  | 2.705635000  | -0.546460000 | -1.273735000 | H | 0.234011000  | 2.755913000  | -1.759005000 |
| C  | 2.877545000  | 0.721311000  | -0.866918000 | H | -0.281540000 | 0.751421000  | -2.740679000 |
| C  | 3.637570000  | 1.029127000  | 0.264065000  | H | 0.400692000  | -0.146059000 | -1.584258000 |

$E = -2041.802344$  a. u.

$H = -2041.584272$  a. u.

$G = -2041.653118$  a. u.

### Transition state (III):

|    |              |              |              |   |              |              |              |
|----|--------------|--------------|--------------|---|--------------|--------------|--------------|
| N  | -0.963320000 | 1.698589000  | -0.411498000 | C | 3.580820000  | -0.688078000 | 0.006975000  |
| C  | -0.527813000 | 0.758333000  | -1.244844000 | C | 1.933877000  | -2.324484000 | 1.032943000  |
| N  | -0.897394000 | -0.494663000 | -1.307957000 | C | 0.542159000  | -2.562028000 | 0.424176000  |
| C  | -1.742375000 | -0.863133000 | -0.310675000 | N | -0.493548000 | -1.700405000 | 1.014527000  |
| N  | -2.392609000 | 0.030904000  | 0.484284000  | H | 4.874068000  | 0.827701000  | -0.798094000 |
| C  | -1.920553000 | 1.244580000  | 0.398106000  | H | 3.540646000  | 2.690845000  | 0.215780000  |
| Cl | -2.636500000 | 2.435900000  | 1.449562000  | H | 1.519639000  | 2.110367000  | 1.542465000  |
| Cl | 0.658420000  | 1.274515000  | -2.409389000 | H | 4.127045000  | -1.516535000 | -0.424083000 |
| Cl | -2.694498000 | -2.318031000 | -0.691732000 | H | 2.622450000  | -3.054623000 | 0.606370000  |
| C  | 3.994817000  | 0.620753000  | -0.201570000 | H | 1.891395000  | -2.505018000 | 2.110260000  |
| C  | 3.259494000  | 1.656593000  | 0.358411000  | H | 0.576825000  | -2.344965000 | -0.646543000 |
| C  | 2.134657000  | 1.332847000  | 1.104769000  | H | 0.249174000  | -3.603251000 | 0.544225000  |
| N  | 1.738179000  | 0.077533000  | 1.319602000  | H | -1.060084000 | -2.171528000 | 1.710815000  |
| C  | 2.446953000  | -0.928015000 | 0.780672000  | H | -0.058688000 | -0.871449000 | 1.428817000  |

$E = -2041.7915$  a. u.

$H = -2041.5740$  a. u.

$G = -2041.6380$  a. u.

$f = 235.2425i$

### Final complex (III):

|    |              |              |              |   |              |              |              |
|----|--------------|--------------|--------------|---|--------------|--------------|--------------|
| N  | -0.376915000 | -2.256233000 | 0.557987000  | C | 2.805917000  | 1.712250000  | 0.276972000  |
| C  | -0.009453000 | -1.162969000 | 1.215367000  | C | 0.974138000  | 2.845908000  | -1.046495000 |
| N  | -0.219924000 | 0.084742000  | 0.868623000  | C | -0.371538000 | 2.665980000  | -0.319507000 |
| C  | -0.863713000 | 0.231885000  | -0.300589000 | N | -1.117911000 | 1.481909000  | -0.758252000 |
| N  | -1.322254000 | -0.793379000 | -1.045626000 | H | 4.265202000  | 0.571409000  | 1.365739000  |
| C  | -1.043779000 | -1.977939000 | -0.558350000 | H | 4.028023000  | -1.413234000 | -0.146945000 |
| Cl | -1.593780000 | -3.345953000 | -1.473205000 | H | 2.442851000  | -1.264010000 | -2.053183000 |
| Cl | 0.850066000  | -1.419606000 | 2.700359000  | H | 2.868848000  | 2.583058000  | 0.916628000  |
| Cl | -3.948567000 | 2.130490000  | 0.783793000  | H | 1.408516000  | 3.783530000  | -0.694523000 |
| C  | 3.580004000  | 0.590162000  | 0.528055000  | H | 0.793069000  | 2.941466000  | -2.118301000 |
| C  | 3.452670000  | -0.511968000 | -0.309123000 | H | -0.220944000 | 2.586499000  | 0.754382000  |
| C  | 2.563808000  | -0.428281000 | -1.372189000 | H | -1.004993000 | 3.532214000  | -0.507324000 |
| N  | 1.813317000  | 0.647955000  | -1.621942000 | H | -2.857200000 | 1.833938000  | 0.134432000  |
| C  | 1.920439000  | 1.701079000  | -0.801613000 | H | -1.439746000 | 1.489715000  | -1.717708000 |

$E = -2041.8415$  a. u.

$H = -2041.6252$  a. u.

$G = -2041.6927$  a. u.

First substitution: **nucleophile p-hydroxybenzaldehyde (IV)**

Pre-reactive complex with  $\pi$ - $\pi$  interaction (IV):

|    |              |              |              |    |              |              |              |
|----|--------------|--------------|--------------|----|--------------|--------------|--------------|
| N  | 0.130996000  | 0.088191000  | -1.554380000 | C  | -1.936299000 | 1.408006000  | 1.028833000  |
| C  | 0.856483000  | 1.107967000  | -1.118594000 | H  | -0.162301000 | 2.234434000  | 1.898554000  |
| N  | 1.958848000  | 1.040259000  | -0.390714000 | C  | -2.139130000 | -1.003123000 | 1.091863000  |
| C  | 2.314785000  | -0.198443000 | -0.079679000 | H  | -0.520352000 | -2.057868000 | 2.007421000  |
| N  | 1.671715000  | -1.305853000 | -0.422545000 | C  | -2.674438000 | 0.248335000  | 0.706489000  |
| C  | 0.589133000  | -1.087705000 | -1.151984000 | H  | -2.335851000 | 2.375455000  | 0.738585000  |
| Cl | -0.293722000 | -2.477648000 | -1.668046000 | H  | -2.702604000 | -1.896694000 | 0.849278000  |
| Cl | 0.333179000  | 2.684241000  | -1.591555000 | C  | -3.921183000 | 0.360486000  | 0.002231000  |
| O  | 1.003478000  | -0.013357000 | 2.571246000  | O  | -4.662033000 | -0.562032000 | -0.342490000 |
| C  | -0.141336000 | 0.074331000  | 2.045867000  | H  | -4.212338000 | 1.404714000  | -0.240646000 |
| C  | -0.729089000 | 1.338109000  | 1.675237000  | Cl | 3.794015000  | -0.391159000 | 0.782001000  |
| C  | -0.935270000 | -1.094211000 | 1.734644000  |    |              |              |              |

$E = -2079.882511$  a. u.

$H = -2079.7277$  a. u.

$G = -2079.7918$  a. u.

Transition state with  $\pi$ - $\pi$  interaction (IV):

|    |              |              |              |    |              |              |              |
|----|--------------|--------------|--------------|----|--------------|--------------|--------------|
| N  | 0.700592000  | 0.078843000  | 1.731996000  | C  | -2.326502000 | -1.446563000 | -0.757883000 |
| C  | 1.180535000  | -1.016236000 | 1.144930000  | H  | -0.468329000 | -2.290558000 | -1.437659000 |
| N  | 1.868505000  | -1.109784000 | 0.042486000  | C  | -2.490410000 | 0.965272000  | -0.872083000 |
| C  | 2.011881000  | 0.070966000  | -0.621959000 | H  | -0.757713000 | 1.977270000  | -1.637070000 |
| N  | 1.694682000  | 1.272051000  | -0.062190000 | C  | -3.066070000 | -0.273907000 | -0.541866000 |
| C  | 1.021893000  | 1.177020000  | 1.049514000  | H  | -2.768224000 | -2.404883000 | -0.506127000 |
| Cl | 0.497553000  | 2.682783000  | 1.772183000  | H  | -3.066118000 | 1.866998000  | -0.704340000 |
| Cl | 0.870748000  | -2.514025000 | 1.997778000  | C  | -4.410327000 | -0.365653000 | 0.011246000  |
| O  | 0.777341000  | -0.084487000 | -2.045529000 | O  | -5.160384000 | 0.572934000  | 0.231802000  |
| C  | -0.455640000 | -0.149881000 | -1.599484000 | H  | -4.742478000 | -1.399204000 | 0.238175000  |
| C  | -1.049159000 | -1.392370000 | -1.277357000 | Cl | 3.444826000  | 0.129351000  | -1.670092000 |
| C  | -1.216603000 | 1.029213000  | -1.389556000 |    |              |              |              |

$E = -2079.8713$  a. u.

$H = -2079.7178$  a. u.

$G = -2079.7799$  a. u.

$f = 308.5013i$

Final complex with  $\pi$ - $\pi$  interaction (IV):

|    |              |              |              |   |             |              |              |
|----|--------------|--------------|--------------|---|-------------|--------------|--------------|
| N  | -3.052618000 | -0.707904000 | -0.526793000 | C | 1.821361000 | 0.221535000  | 0.882250000  |
| C  | -1.839484000 | -1.227326000 | -0.633043000 | C | 2.474888000 | 1.261387000  | -1.221679000 |
| N  | -0.695716000 | -0.576327000 | -0.636001000 | C | 3.122254000 | -0.229899000 | 1.041383000  |
| C  | -0.828128000 | 0.735879000  | -0.473003000 | H | 1.041483000 | 0.016245000  | 1.608150000  |
| N  | -1.981776000 | 1.398585000  | -0.403479000 | C | 3.769427000 | 0.805388000  | -1.047874000 |
| C  | -3.037127000 | 0.615624000  | -0.428002000 | H | 2.189593000 | 1.844794000  | -2.086313000 |
| Cl | -4.583424000 | 1.390865000  | -0.327114000 | C | 4.101822000 | 0.054362000  | 0.084561000  |
| Cl | -1.751465000 | -2.948671000 | -0.803023000 | H | 3.382963000 | -0.807765000 | 1.920174000  |
| O  | 0.254023000  | 1.510322000  | -0.425990000 | H | 4.534484000 | 1.021296000  | -1.781526000 |
| C  | 1.523597000  | 0.956700000  | -0.255885000 | C | 5.472483000 | -0.439881000 | 0.286657000  |



|   |             |              |              |    |              |              |             |
|---|-------------|--------------|--------------|----|--------------|--------------|-------------|
| O | 6.400250000 | -0.255616000 | -0.475983000 | Cl | -1.275729000 | -0.113746000 | 2.770635000 |
| H | 5.621997000 | -1.018935000 | 1.218565000  |    |              |              |             |

$E = -2079.9209$  a. u.

$H = -2079.7639$  a. u.

$G = -2079.8297$  a. u.

Second substitution — reaction in (1): **nucleophile aminoalkyl phosphoramidate (IIa)**

Pre-reactive complex (IIa in 1):

|    |              |              |              |   |             |              |              |
|----|--------------|--------------|--------------|---|-------------|--------------|--------------|
| N  | -0.801848000 | -0.235247000 | -0.759152000 | C | 2.312552000 | -2.144032000 | -0.653818000 |
| C  | -1.457926000 | -0.177886000 | 0.396682000  | C | 2.011096000 | -3.001609000 | 0.574671000  |
| N  | -2.588907000 | -0.753137000 | 0.698912000  | N | 0.684543000 | -2.691222000 | 1.120597000  |
| C  | -3.135118000 | -1.476383000 | -0.304335000 | C | 2.843669000 | 2.271158000  | -1.035794000 |
| N  | -2.533828000 | -1.662086000 | -1.507244000 | C | 1.445860000 | 2.682723000  | -1.457490000 |
| C  | -1.405008000 | -1.023304000 | -1.646792000 | C | 3.814027000 | 3.432844000  | -0.943020000 |
| Cl | -0.573130000 | -1.206719000 | -3.162852000 | C | 5.786175000 | -0.116815000 | 0.762527000  |
| Cl | -0.695888000 | 0.769293000  | 1.636733000  | C | 6.079348000 | -1.539593000 | 1.202442000  |
| C  | -4.221347000 | 2.614663000  | 1.374059000  | C | 6.882749000 | 0.485151000  | -0.093846000 |
| C  | -3.809855000 | 2.881212000  | 0.073490000  | H | 1.223885000 | -0.361562000 | -0.525587000 |
| C  | -4.241338000 | 2.032646000  | -0.936706000 | H | 1.625749000 | -2.407807000 | -1.459162000 |
| N  | -5.013798000 | 0.964085000  | -0.722936000 | H | 3.325864000 | -2.355562000 | -1.001360000 |
| C  | -5.387856000 | 0.692924000  | 0.534204000  | H | 2.024258000 | -4.049890000 | 0.265598000  |
| C  | -5.022823000 | 1.508478000  | 1.606754000  | H | 2.813480000 | -2.868130000 | 1.311557000  |
| C  | -6.149454000 | -0.587072000 | 0.753190000  | H | 0.721913000 | -1.789922000 | 1.586090000  |
| C  | -5.212296000 | -1.787654000 | 1.001649000  | H | 0.440784000 | -3.363713000 | 1.838796000  |
| N  | -4.321420000 | -2.052861000 | -0.119293000 | H | 3.231749000 | 1.517260000  | -1.723734000 |
| H  | -3.914816000 | 3.253546000  | 2.192307000  | H | 1.476218000 | 3.143886000  | -2.446391000 |
| H  | -3.174311000 | 3.725862000  | -0.155419000 | H | 0.779999000 | 1.821094000  | -1.496093000 |
| H  | -3.951591000 | 2.214518000  | -1.966279000 | H | 1.036731000 | 3.406098000  | -0.749396000 |
| H  | -5.349123000 | 1.261980000  | 2.608887000  | H | 3.920841000 | 3.911574000  | -1.918005000 |
| H  | -6.805913000 | -0.499449000 | 1.621232000  | H | 4.795382000 | 3.088573000  | -0.616688000 |
| H  | -6.769621000 | -0.792025000 | -0.120630000 | H | 3.449815000 | 4.174369000  | -0.229486000 |
| H  | -4.604323000 | -1.615627000 | 1.886814000  | H | 5.607636000 | 0.509808000  | 1.638510000  |
| H  | -5.807206000 | -2.685096000 | 1.168415000  | H | 6.992207000 | -1.567907000 | 1.800154000  |
| H  | -4.703643000 | -2.513414000 | -0.931563000 | H | 5.257655000 | -1.927870000 | 1.803566000  |
| P  | 3.134257000  | 0.156045000  | 0.584350000  | H | 6.214841000 | -2.182794000 | 0.330399000  |
| O  | 3.074938000  | -0.103633000 | 2.038045000  | H | 6.626703000 | 1.501466000  | -0.393684000 |
| O  | 2.753043000  | 1.669275000  | 0.293978000  | H | 7.034979000 | -0.115021000 | -0.993059000 |
| O  | 4.572059000  | -0.119182000 | -0.048624000 | H | 7.819074000 | 0.515114000  | 0.465683000  |
| N  | 2.178854000  | -0.699556000 | -0.443327000 |   |             |              |              |

$E = -2575.50362$  a. u.

$H = -2574.972396$  a. u.

$G = -2575.079732$  a. u.

Transition state (IIa in 1):

|    |             |              |              |   |             |              |              |
|----|-------------|--------------|--------------|---|-------------|--------------|--------------|
| N  | 0.805767000 | -0.276752000 | 0.911065000  | C | 4.904227000 | 2.375770000  | 0.727145000  |
| C  | 1.345131000 | 0.551494000  | 0.050093000  | C | 4.689133000 | 1.509081000  | 1.792352000  |
| N  | 2.142061000 | 0.305236000  | -0.960608000 | C | 4.828198000 | 0.146736000  | 1.565993000  |
| C  | 2.456644000 | -1.010308000 | -1.075873000 | N | 5.140160000 | -0.375426000 | 0.377173000  |
| N  | 1.967773000 | -1.980087000 | -0.301488000 | C | 5.315381000 | 0.457871000  | -0.656041000 |
| C  | 1.084277000 | -1.591284000 | 0.631769000  | C | 5.221804000 | 1.843435000  | -0.511801000 |
| Cl | 1.214840000 | -2.592858000 | 2.169777000  | C | 5.532635000 | -0.170740000 | -2.005620000 |
| Cl | 0.935885000 | 2.246463000  | 0.298424000  | C | 4.204120000 | -0.444295000 | -2.743770000 |

|   |              |              |              |   |              |              |              |
|---|--------------|--------------|--------------|---|--------------|--------------|--------------|
| N | 3.327868000  | -1.367280000 | -2.041250000 | C | -6.719592000 | -0.306971000 | -0.506307000 |
| H | 4.813517000  | 3.446436000  | 0.858931000  | H | -1.229048000 | 0.312327000  | 1.097133000  |
| H | 4.423826000  | 1.876560000  | 2.774450000  | H | -1.409537000 | -1.327231000 | 2.569239000  |
| H | 4.676916000  | -0.561439000 | 2.373863000  | H | -3.093629000 | -1.641952000 | 2.171658000  |
| H | 5.375792000  | 2.487184000  | -1.368296000 | H | -1.464421000 | -3.453545000 | 1.498613000  |
| H | 6.134779000  | 0.483656000  | -2.640076000 | H | -2.543540000 | -2.898534000 | 0.217635000  |
| H | 6.073055000  | -1.110732000 | -1.881690000 | H | -0.830140000 | -1.666580000 | -0.740529000 |
| H | 3.663384000  | 0.486771000  | -2.897535000 | H | -0.208011000 | -3.165178000 | -0.446922000 |
| H | 4.422347000  | -0.871655000 | -3.723187000 | H | -4.140537000 | 1.980217000  | 1.156513000  |
| H | 3.609217000  | -2.335050000 | -2.004654000 | H | -3.004479000 | 4.112676000  | 1.802727000  |
| P | -2.932398000 | 0.132519000  | -0.348236000 | H | -1.846375000 | 2.785422000  | 1.620858000  |
| O | -2.350706000 | -0.506578000 | -1.553328000 | H | -1.999279000 | 4.004141000  | 0.346213000  |
| O | -2.980045000 | 1.699334000  | -0.547823000 | H | -5.153067000 | 4.106690000  | 0.322726000  |
| O | -4.391125000 | -0.372789000 | 0.019826000  | H | -5.375753000 | 2.787154000  | -0.836392000 |
| N | -2.156551000 | -0.107129000 | 1.090162000  | H | -4.132031000 | 4.015795000  | -1.123069000 |
| C | -2.114603000 | -1.420003000 | 1.745868000  | H | -5.109043000 | -0.182181000 | -1.923863000 |
| C | -1.710861000 | -2.605662000 | 0.861571000  | H | -5.985647000 | -2.525857000 | -2.034997000 |
| N | -0.545385000 | -2.316617000 | -0.001071000 | H | -4.259156000 | -2.479781000 | -1.644964000 |
| C | -3.627290000 | 2.596951000  | 0.416104000  | H | -5.453084000 | -2.787761000 | -0.365187000 |
| C | -2.549917000 | 3.424030000  | 1.088573000  | H | -6.738569000 | 0.765563000  | -0.312424000 |
| C | -4.635239000 | 3.426030000  | -0.354866000 | H | -6.960534000 | -0.832736000 | 0.419496000  |
| C | -5.360043000 | -0.737970000 | -1.017466000 | H | -7.485826000 | -0.539596000 | -1.247251000 |
| C | -5.254725000 | -2.228033000 | -1.281420000 |   |              |              |              |

$E = -2575.4796$  a. u.

$H = -2574.9490$  a. u.

$G = -2575.0501$  a. u.

$f = 273.3656i$

Final complex (IIa in 1):

|    |             |              |              |   |              |              |              |
|----|-------------|--------------|--------------|---|--------------|--------------|--------------|
| N  | 0.630319000 | 0.742249000  | -0.449019000 | P | -3.283583000 | 0.215747000  | -0.411515000 |
| C  | 1.746268000 | 1.473614000  | -0.440958000 | O | -2.840125000 | -0.109991000 | -1.801042000 |
| N  | 2.859086000 | 1.222817000  | -1.073007000 | O | -3.935298000 | 1.645461000  | -0.397966000 |
| C  | 2.868183000 | 0.074347000  | -1.788618000 | O | -4.284896000 | -0.835112000 | 0.203222000  |
| N  | 1.783177000 | -0.741335000 | -1.891122000 | N | -2.087360000 | 0.234949000  | 0.724636000  |
| C  | 0.750280000 | -0.337089000 | -1.207729000 | C | -1.327930000 | -0.973307000 | 1.082098000  |
| Cl | 1.155542000 | -3.478245000 | 2.219061000  | C | -0.909257000 | -1.901170000 | -0.061549000 |
| Cl | 1.689484000 | 2.915123000  | 0.518309000  | N | -0.434812000 | -1.181092000 | -1.317608000 |
| C  | 4.976724000 | 1.080879000  | 2.181391000  | C | -4.609057000 | 2.207591000  | 0.786475000  |
| C  | 4.053682000 | 0.094973000  | 2.507655000  | C | -3.741785000 | 3.323419000  | 1.331926000  |
| C  | 3.899198000 | -0.980865000 | 1.641312000  | C | -5.980239000 | 2.665601000  | 0.334780000  |
| N  | 4.586445000 | -1.103231000 | 0.500835000  | C | -5.336039000 | -1.480832000 | -0.601672000 |
| C  | 5.459350000 | -0.141365000 | 0.175130000  | C | -4.811370000 | -2.812162000 | -1.101102000 |
| C  | 5.690422000 | 0.961086000  | 0.998177000  | C | -6.548384000 | -1.599398000 | 0.297391000  |
| C  | 6.122717000 | -0.264812000 | -1.170915000 | H | -1.461262000 | 1.019863000  | 0.582335000  |
| C  | 5.272090000 | 0.353131000  | -2.298406000 | H | -0.446985000 | -0.647566000 | 1.627653000  |
| N  | 3.968271000 | -0.284428000 | -2.438041000 | H | -1.914252000 | -1.587223000 | 1.765442000  |
| H  | 5.133015000 | 1.931145000  | 2.833241000  | H | -0.113448000 | -2.557412000 | 0.292983000  |
| H  | 3.466838000 | 0.149521000  | 3.414817000  | H | -1.748359000 | -2.499633000 | -0.410912000 |
| H  | 3.189352000 | -1.772183000 | 1.864171000  | H | -1.280574000 | -0.631929000 | -1.667636000 |
| H  | 6.407905000 | 1.716316000  | 0.703637000  | H | -0.220388000 | -1.889549000 | -2.021027000 |
| H  | 7.087322000 | 0.246496000  | -1.173987000 | H | -4.704491000 | 1.408535000  | 1.524000000  |
| H  | 6.298869000 | -1.318733000 | -1.391629000 | H | -4.224895000 | 3.773893000  | 2.200364000  |
| H  | 5.113174000 | 1.413231000  | -2.115504000 | H | -2.768015000 | 2.944131000  | 1.640754000  |
| H  | 5.791112000 | 0.246181000  | -3.250426000 | H | -3.597256000 | 4.095998000  | 0.574876000  |
| H  | 3.927697000 | -1.188353000 | -2.885170000 | H | -6.527544000 | 3.082128000  | 1.181587000  |

|   |              |              |              |   |              |              |              |
|---|--------------|--------------|--------------|---|--------------|--------------|--------------|
| H | -6.553687000 | 1.832580000  | -0.071928000 | H | -4.528077000 | -3.446753000 | -0.259531000 |
| H | -5.889490000 | 3.435156000  | -0.433681000 | H | -6.871025000 | -0.618267000 | 0.645967000  |
| H | -5.559135000 | -0.826206000 | -1.447116000 | H | -6.317902000 | -2.220641000 | 1.164523000  |
| H | -5.586273000 | -3.322594000 | -1.675029000 | H | -7.370543000 | -2.060240000 | -0.251741000 |
| H | -3.945830000 | -2.665244000 | -1.746357000 |   |              |              |              |

$E = -2575.5179$  a. u.

$H = -2574.9841$  a. u.

$G = -2575.0884$  a. u.

### Second substitution — reaction in (1): nucleophile *p*-hydroxybenzaldehyde (IV)

#### Pre-reactive complex (IV in 1):

|    |              |              |              |   |              |              |              |
|----|--------------|--------------|--------------|---|--------------|--------------|--------------|
| N  | 0.827862000  | 2.098561000  | 0.842943000  | H | -3.590908000 | -1.996864000 | 0.654520000  |
| C  | 0.137564000  | 0.990060000  | 1.089238000  | H | -3.279666000 | -2.351925000 | -1.796081000 |
| N  | -0.343045000 | 0.132981000  | 0.230032000  | H | -3.056910000 | -0.960575000 | -2.862551000 |
| C  | -0.070984000 | 0.425677000  | -1.059479000 | H | -0.996192000 | -2.032135000 | -0.857692000 |
| N  | 0.625990000  | 1.524287000  | -1.446319000 | H | -0.980741000 | -2.311198000 | -2.587744000 |
| C  | 1.022851000  | 2.283223000  | -0.460442000 | H | -0.306158000 | -0.091404000 | -2.961234000 |
| Cl | 1.895025000  | 3.728802000  | -0.893257000 | O | 4.169203000  | 0.703768000  | -0.196486000 |
| Cl | -0.187979000 | 0.662781000  | 2.770566000  | C | 3.438799000  | -0.305798000 | -0.002029000 |
| C  | -3.978337000 | -0.038557000 | 1.455022000  | C | 3.027175000  | -0.727922000 | 1.316149000  |
| C  | -3.987981000 | 1.320212000  | 1.161430000  | C | 2.940699000  | -1.118848000 | -1.092277000 |
| C  | -3.659588000 | 1.713023000  | -0.128606000 | C | 2.203489000  | -1.805784000 | 1.503689000  |
| N  | -3.321503000 | 0.858372000  | -1.097941000 | H | 3.374555000  | -0.139995000 | 2.157853000  |
| C  | -3.290015000 | -0.448143000 | -0.807859000 | C | 2.117757000  | -2.189996000 | -0.884262000 |
| C  | -3.626843000 | -0.933124000 | 0.457641000  | H | 3.231558000  | -0.826217000 | -2.094793000 |
| C  | -2.799410000 | -1.375182000 | -1.886567000 | C | 1.711279000  | -2.566877000 | 0.418807000  |
| C  | -1.277126000 | -1.602202000 | -1.815157000 | H | 1.893604000  | -2.076338000 | 2.508895000  |
| N  | -0.504226000 | -0.388329000 | -2.019064000 | H | 1.742962000  | -2.765073000 | -1.723331000 |
| H  | -4.231430000 | -0.391722000 | 2.446603000  | C | 0.795412000  | -3.641272000 | 0.654506000  |
| H  | -4.245552000 | 2.057848000  | 1.909515000  | O | 0.242765000  | -4.349931000 | -0.193987000 |
| H  | -3.666722000 | 2.763939000  | -0.398910000 | H | 0.572058000  | -3.817996000 | 1.728100000  |

$E = -2001.5180$  a. u.

$H = -2001.2024$  a. u.

$G = -2001.2828$  a. u.

#### Transition state (IV in 1):

|    |              |              |              |   |              |              |              |
|----|--------------|--------------|--------------|---|--------------|--------------|--------------|
| N  | 0.167051000  | -1.790254000 | 0.839654000  | N | 0.568766000  | 1.246281000  | -1.792745000 |
| C  | 0.358297000  | -0.546396000 | 1.168988000  | H | 4.333177000  | 1.361673000  | 2.613710000  |
| N  | 0.467079000  | 0.524997000  | 0.411393000  | H | 4.810774000  | -0.942966000 | 1.747776000  |
| C  | 0.411011000  | 0.227264000  | -0.910299000 | H | 4.333195000  | -1.428964000 | -0.640402000 |
| N  | 0.212345000  | -0.986715000 | -1.414065000 | H | 3.354683000  | 3.037076000  | 1.054870000  |
| C  | -0.040229000 | -1.956936000 | -0.512362000 | H | 2.950829000  | 3.654043000  | -1.341682000 |
| Cl | 0.553633000  | -3.594829000 | -1.073368000 | H | 2.961271000  | 2.391783000  | -2.578056000 |
| Cl | 0.526112000  | -0.241376000 | 2.910377000  | H | 0.794583000  | 2.799697000  | -0.451061000 |
| C  | 4.135446000  | 1.103797000  | 1.581010000  | H | 0.682693000  | 3.281314000  | -2.141070000 |
| C  | 4.402854000  | -0.174586000 | 1.104943000  | H | 0.636197000  | 0.947146000  | -2.752911000 |
| C  | 4.133052000  | -0.445002000 | -0.229417000 | O | -1.759108000 | -2.365036000 | -0.639758000 |
| N  | 3.621317000  | 0.452442000  | -1.075876000 | C | -2.525687000 | -1.327049000 | -0.343510000 |
| C  | 3.337402000  | 1.674789000  | -0.610126000 | C | -2.979704000 | -1.118423000 | 0.974409000  |
| C  | 3.595141000  | 2.038389000  | 0.713257000  | C | -2.884519000 | -0.386917000 | -1.337490000 |
| C  | 2.654958000  | 2.624082000  | -1.556493000 | C | -3.746196000 | -0.011752000 | 1.283811000  |
| C  | 1.115648000  | 2.547218000  | -1.459132000 | H | -2.697992000 | -1.837275000 | 1.731201000  |

|   |              |              |              |   |              |             |              |
|---|--------------|--------------|--------------|---|--------------|-------------|--------------|
| C | -3.649444000 | 0.714483000  | -1.021785000 | H | -3.918777000 | 1.438516000 | -1.780670000 |
| H | -2.529161000 | -0.554230000 | -2.344996000 | C | -4.888487000 | 2.086617000 | 0.657280000  |
| C | -4.087984000 | 0.923414000  | 0.296249000  | O | -5.256385000 | 2.967446000 | -0.104388000 |
| H | -4.083786000 | 0.145672000  | 2.302617000  | H | -5.164673000 | 2.137519000 | 1.730176000  |

$E = -2001.4916$  a. u.

$H = -2001.1777$  a. u.

$G = -2001.2584$  a. u.

$f = 343.371i$

Final complex (IV in 1):

|    |              |              |              |   |              |              |              |
|----|--------------|--------------|--------------|---|--------------|--------------|--------------|
| N  | 0.856649000  | -1.730808000 | -1.640574000 | H | 5.078670000  | 0.940557000  | 1.374006000  |
| C  | 2.006919000  | -1.747701000 | -0.994509000 | H | 3.802314000  | 0.898025000  | 3.517069000  |
| N  | 2.231293000  | -1.529313000 | 0.278349000  | H | 2.095236000  | 1.352365000  | 3.520235000  |
| C  | 1.118413000  | -1.240884000 | 0.988301000  | H | 3.266345000  | -1.289020000 | 2.501804000  |
| N  | -0.122656000 | -1.214297000 | 0.459180000  | H | 2.387132000  | -1.052211000 | 4.011156000  |
| C  | -0.175308000 | -1.454716000 | -0.831301000 | H | 0.377672000  | -0.671922000 | 2.736587000  |
| Cl | -1.270495000 | 3.327911000  | -1.979873000 | O | -1.359739000 | -1.443254000 | -1.460943000 |
| Cl | 3.417052000  | -2.103819000 | -1.965650000 | C | -2.501552000 | -1.044239000 | -0.763899000 |
| C  | 4.212978000  | 1.715938000  | -0.438595000 | C | -3.343080000 | -2.023774000 | -0.260692000 |
| C  | 3.034082000  | 2.155168000  | -1.027926000 | C | -2.796981000 | 0.311121000  | -0.676582000 |
| C  | 1.878282000  | 2.185152000  | -0.256131000 | C | -4.517813000 | -1.631701000 | 0.364263000  |
| N  | 1.844873000  | 1.791990000  | 1.021466000  | H | -3.073257000 | -3.066251000 | -0.358875000 |
| C  | 2.975341000  | 1.342665000  | 1.581748000  | C | -3.972058000 | 0.689111000  | -0.051964000 |
| C  | 4.183830000  | 1.305620000  | 0.885965000  | H | -2.127843000 | 1.054821000  | -1.097793000 |
| C  | 2.858404000  | 0.791985000  | 2.977971000  | C | -4.838540000 | -0.276191000 | 0.475895000  |
| C  | 2.484656000  | -0.705340000 | 2.982041000  | H | -5.190081000 | -2.379145000 | 0.768608000  |
| N  | 1.231228000  | -0.980751000 | 2.296453000  | H | -4.231005000 | 1.736368000  | 0.031117000  |
| H  | 5.136556000  | 1.685037000  | -1.003040000 | C | -6.088919000 | 0.110194000  | 1.147298000  |
| H  | 3.003620000  | 2.473505000  | -2.061340000 | O | -6.473575000 | 1.250933000  | 1.308559000  |
| H  | 0.941866000  | 2.534742000  | -0.682000000 | H | -6.693830000 | -0.740080000 | 1.519997000  |

$E = -2001.5519$  a. u.

$H = -2001.2340$  a. u.

$G = -2001.3148$  a. u.

Second substitution — reaction in (2): **nucleophile 2-(pyridin-2-yl)ethanamine (III)**

Pre-reactive complex (III in 2):

|    |              |              |              |   |              |              |              |
|----|--------------|--------------|--------------|---|--------------|--------------|--------------|
| N  | 1.032464000  | -1.254984000 | 0.438165000  | C | 0.409538000  | 3.470267000  | -0.514936000 |
| C  | 1.263981000  | -1.011315000 | -0.846538000 | C | 1.606716000  | 2.622281000  | -0.965827000 |
| N  | 2.462188000  | -0.818702000 | -1.396053000 | N | 2.515146000  | 2.171464000  | 0.091986000  |
| C  | 3.451997000  | -0.843130000 | -0.528886000 | H | -3.928360000 | 2.889350000  | 1.124577000  |
| N  | 3.363120000  | -1.062345000 | 0.778994000  | H | -3.247423000 | 0.776052000  | 2.290461000  |
| C  | 2.119737000  | -1.259874000 | 1.183752000  | H | -0.891397000 | 0.007556000  | 2.050349000  |
| Cl | 1.889058000  | -1.542513000 | 2.875791000  | H | -2.221841000 | 4.126282000  | -0.194769000 |
| Cl | 5.040248000  | -0.579621000 | -1.153881000 | H | -0.060208000 | 3.930291000  | -1.389450000 |
| C  | -2.910003000 | 2.526139000  | 1.066203000  | H | 0.775779000  | 4.300508000  | 0.100835000  |
| C  | -2.537508000 | 1.353919000  | 1.714635000  | H | 1.238524000  | 1.741873000  | -1.497645000 |
| C  | -1.223951000 | 0.929379000  | 1.587270000  | H | 2.188233000  | 3.197196000  | -1.689847000 |
| N  | -0.302490000 | 1.594534000  | 0.886330000  | H | 2.988129000  | 2.967916000  | 0.505639000  |
| C  | -0.652408000 | 2.725267000  | 0.263805000  | H | 1.955388000  | 1.748376000  | 0.825168000  |
| C  | -1.960045000 | 3.216460000  | 0.330380000  | O | 0.254711000  | -0.920354000 | -1.711763000 |

|   |              |              |              |
|---|--------------|--------------|--------------|
| C | -1.080277000 | -1.031398000 | -1.324619000 |
| C | -1.907773000 | 0.012010000  | -1.705821000 |
| C | -1.564952000 | -2.162826000 | -0.676033000 |
| C | -3.257490000 | -0.064025000 | -1.402799000 |
| H | -1.487266000 | 0.869324000  | -2.211013000 |
| C | -2.913139000 | -2.226169000 | -0.377170000 |
| H | -0.893903000 | -2.964141000 | -0.406149000 |

|   |              |              |              |
|---|--------------|--------------|--------------|
| C | -3.767618000 | -1.176300000 | -0.731752000 |
| H | -3.916301000 | 0.751012000  | -1.675205000 |
| H | -3.321651000 | -3.087187000 | 0.134519000  |
| C | -5.200384000 | -1.222138000 | -0.398366000 |
| O | -5.748130000 | -2.129707000 | 0.193460000  |
| H | -5.780066000 | -0.338694000 | -0.729239000 |

$E = -2001.96121$  a. u.

$H = -2001.632861$  a. u.

$G = -2001.715927$  a. u.

Transition state (III in 2):

|    |              |              |              |
|----|--------------|--------------|--------------|
| N  | -0.041493000 | -1.286834000 | -0.489594000 |
| C  | -0.332402000 | -0.808201000 | 0.720842000  |
| N  | -1.485774000 | -0.883639000 | 1.347953000  |
| C  | -2.483460000 | -1.400442000 | 0.597402000  |
| N  | -2.269923000 | -2.090856000 | -0.565922000 |
| C  | -1.062849000 | -1.939873000 | -1.033978000 |
| Cl | -0.722935000 | -2.704842000 | -2.569636000 |
| Cl | -3.824904000 | -2.071270000 | 1.580719000  |
| C  | 0.313610000  | 3.840513000  | -0.429827000 |
| C  | 0.698190000  | 2.906385000  | -1.382420000 |
| C  | -0.225885000 | 1.944721000  | -1.767661000 |
| N  | -1.464781000 | 1.888068000  | -1.277121000 |
| C  | -1.841993000 | 2.788217000  | -0.355052000 |
| C  | -0.969666000 | 3.777231000  | 0.096381000  |
| C  | -3.249385000 | 2.663552000  | 0.176760000  |
| C  | -3.519725000 | 1.306397000  | 0.846057000  |
| N  | -3.418661000 | 0.178737000  | -0.093341000 |
| H  | 1.004727000  | 4.603595000  | -0.095042000 |
| H  | 1.690688000  | 2.911857000  | -1.811089000 |
| H  | 0.037651000  | 1.183313000  | -2.492245000 |
| H  | -1.295242000 | 4.484963000  | 0.847091000  |

|   |              |              |              |
|---|--------------|--------------|--------------|
| H | -3.437066000 | 3.449557000  | 0.908900000  |
| H | -3.958334000 | 2.808541000  | -0.643241000 |
| H | -2.781377000 | 1.136363000  | 1.633713000  |
| H | -4.506761000 | 1.299207000  | 1.304289000  |
| H | -4.316280000 | -0.128027000 | -0.451879000 |
| H | -2.807480000 | 0.439390000  | -0.873045000 |
| O | 0.627371000  | -0.164013000 | 1.414217000  |
| C | 1.957913000  | -0.195539000 | 1.028225000  |
| C | 2.604765000  | 1.028063000  | 0.944249000  |
| C | 2.637401000  | -1.397970000 | 0.839823000  |
| C | 3.959278000  | 1.052675000  | 0.648384000  |
| H | 2.041498000  | 1.935725000  | 1.104372000  |
| C | 3.986039000  | -1.362346000 | 0.543154000  |
| H | 2.107901000  | -2.335812000 | 0.921481000  |
| C | 4.658654000  | -0.137907000 | 0.441133000  |
| H | 4.477133000  | 2.001531000  | 0.574785000  |
| H | 4.538533000  | -2.279753000 | 0.390021000  |
| C | 6.094162000  | -0.086944000 | 0.124739000  |
| O | 6.799427000  | -1.056012000 | -0.071983000 |
| H | 6.519836000  | 0.934129000  | 0.072518000  |

$E = -2001.94612$  a. u.

$H = -2001.61823$  a. u.

$G = -2001.69775$  a. u.

$f = 238.2188i$

Final complex (III in 2):

|    |              |              |              |
|----|--------------|--------------|--------------|
| N  | -0.502563000 | -0.921479000 | 0.805399000  |
| C  | -0.066172000 | -0.416774000 | -0.348349000 |
| N  | 1.193270000  | -0.283500000 | -0.723662000 |
| C  | 2.083596000  | -0.684672000 | 0.184425000  |
| N  | 1.770702000  | -1.251269000 | 1.370044000  |
| C  | 0.481527000  | -1.328035000 | 1.593621000  |
| Cl | -0.003449000 | -2.033900000 | 3.108030000  |
| Cl | 4.013162000  | -3.326928000 | -1.678372000 |
| C  | 0.690808000  | 3.543646000  | -0.482965000 |
| C  | 0.308146000  | 3.240760000  | 0.818590000  |
| C  | 1.201602000  | 2.541863000  | 1.619039000  |
| N  | 2.401709000  | 2.134151000  | 1.199348000  |
| C  | 2.761131000  | 2.406053000  | -0.061840000 |

|   |              |              |              |
|---|--------------|--------------|--------------|
| C | 1.934188000  | 3.122584000  | -0.928322000 |
| C | 4.070613000  | 1.826218000  | -0.526762000 |
| C | 3.924230000  | 0.395886000  | -1.079180000 |
| N | 3.411129000  | -0.562577000 | -0.093886000 |
| H | 0.028668000  | 4.092476000  | -1.140317000 |
| H | -0.652769000 | 3.545212000  | 1.211112000  |
| H | 0.943299000  | 2.294086000  | 2.643085000  |
| H | 2.259088000  | 3.328644000  | -1.939867000 |
| H | 4.500185000  | 2.438898000  | -1.321730000 |
| H | 4.774370000  | 1.817519000  | 0.307366000  |
| H | 3.254621000  | 0.381064000  | -1.935513000 |
| H | 4.898138000  | 0.033236000  | -1.406880000 |
| H | 3.761464000  | -2.239447000 | -0.992948000 |

|   |              |              |              |   |              |              |              |
|---|--------------|--------------|--------------|---|--------------|--------------|--------------|
| H | 3.989326000  | -0.699366000 | 0.725418000  | H | -2.576650000 | -1.993135000 | -1.703289000 |
| O | -0.960226000 | 0.015006000  | -1.246998000 | C | -5.036131000 | 0.011439000  | -0.472811000 |
| C | -2.320362000 | -0.010190000 | -0.936933000 | H | -4.731233000 | 2.003287000  | 0.280597000  |
| C | -2.894009000 | 1.123707000  | -0.385852000 | H | -5.042556000 | -1.976187000 | -1.280176000 |
| C | -3.068091000 | -1.132727000 | -1.270508000 | C | -6.486791000 | 0.042043000  | -0.215876000 |
| C | -4.261308000 | 1.128411000  | -0.152226000 | O | -7.253927000 | -0.866147000 | -0.459668000 |
| H | -2.272796000 | 1.975571000  | -0.148160000 | H | -6.857440000 | 0.983615000  | 0.233495000  |
| C | -4.430866000 | -1.118470000 | -1.034676000 |   |              |              |              |

$E = -2001.9968$  a. u.

$H = -2001.6703$  a. u.

$G = -2001.7543$  a. u.

Third substitution — reaction in (4): **nucleophile aminoalkyl phosphoramidate (IIc)**

Pre-reactive complex (IIc in 4):

|    |              |              |              |   |               |              |              |
|----|--------------|--------------|--------------|---|---------------|--------------|--------------|
| N  | 2.306403000  | 3.672794000  | 0.020234000  | C | -4.917798000  | -0.740777000 | -0.595009000 |
| C  | 1.304299000  | 2.789725000  | 0.061807000  | C | -3.923394000  | -1.744034000 | -0.799105000 |
| N  | 1.304718000  | 1.622421000  | 0.665544000  | C | -4.602912000  | -2.951462000 | -0.868363000 |
| C  | 2.434212000  | 1.332087000  | 1.346489000  | H | -4.161548000  | -3.925270000 | -1.008562000 |
| N  | 3.491325000  | 2.182325000  | 1.431964000  | C | -5.973962000  | -2.701768000 | -0.702092000 |
| C  | 3.350959000  | 3.275531000  | 0.733900000  | C | -2.442824000  | -1.594761000 | -0.911181000 |
| Cl | 4.717216000  | 4.369521000  | 0.740363000  | H | -1.973618000  | -2.577130000 | -0.935065000 |
| O  | 0.216753000  | 3.191251000  | -0.623237000 | H | -2.025503000  | -1.038900000 | -0.071500000 |
| N  | 2.527176000  | 0.162502000  | 1.971569000  | H | -2.161001000  | -1.059022000 | -1.818776000 |
| C  | 1.508759000  | -0.872633000 | 1.877616000  | C | -7.087626000  | -3.687500000 | -0.694277000 |
| C  | 0.353809000  | -0.637962000 | 2.855120000  | H | -7.783149000  | -3.489298000 | -1.511914000 |
| C  | -0.809655000 | -1.573558000 | 2.641356000  | H | -7.659463000  | -3.619214000 | 0.232771000  |
| C  | -2.117281000 | -1.148657000 | 2.889729000  | H | -6.696678000  | -4.697739000 | -0.798862000 |
| C  | -3.169993000 | -2.026366000 | 2.685264000  | C | -5.966233000  | 1.430261000  | -0.265337000 |
| C  | -2.889506000 | -3.312248000 | 2.240206000  | C | -6.139907000  | 2.842601000  | -0.144280000 |
| C  | -1.562483000 | -3.652606000 | 2.020969000  | C | -7.502714000  | 3.049899000  | 0.015887000  |
| N  | -0.541868000 | -2.812280000 | 2.212829000  | H | -7.995344000  | 4.001953000  | 0.134601000  |
| C  | -0.992370000 | 2.508011000  | -0.538422000 | C | -8.149388000  | 1.803886000  | -0.008512000 |
| C  | -1.593859000 | 2.225975000  | 0.680867000  | C | -5.113835000  | 3.928644000  | -0.186545000 |
| C  | -2.840173000 | 1.619724000  | 0.690794000  | H | -5.605370000  | 4.901175000  | -0.182048000 |
| C  | -3.490348000 | 1.300062000  | -0.500108000 | H | -4.488156000  | 3.862424000  | -1.077108000 |
| C  | -2.879071000 | 1.610088000  | -1.711609000 | H | -4.441713000  | 3.883831000  | 0.671892000  |
| C  | -1.629961000 | 2.218010000  | -1.734199000 | C | -9.604665000  | 1.527013000  | 0.124267000  |
| C  | -4.825129000 | 0.646566000  | -0.458300000 | H | -9.992285000  | 1.058143000  | -0.782060000 |
| H  | 3.444080000  | -0.066333000 | 2.354826000  | H | -10.148770000 | 2.451827000  | 0.305875000  |
| H  | 1.122940000  | -0.910799000 | 0.859250000  | H | -9.792895000  | 0.833809000  | 0.945929000  |
| H  | 1.989888000  | -1.825341000 | 2.077850000  | N | -6.161312000  | -1.379522000 | -0.538305000 |
| H  | 0.724357000  | -0.747338000 | 3.879665000  | N | -7.230194000  | 0.837430000  | -0.180873000 |
| H  | 0.007639000  | 0.391240000  | 2.754634000  | N | 5.530638000   | 0.085096000  | 2.365998000  |
| H  | -2.297184000 | -0.138330000 | 3.232047000  | C | 6.870816000   | -0.499886000 | 2.466661000  |
| H  | -4.191416000 | -1.710458000 | 2.854385000  | N | 5.936339000   | -1.133337000 | -2.491820000 |
| H  | -3.678040000 | -4.027065000 | 2.051204000  | P | 4.524238000   | -1.121872000 | -1.653294000 |
| H  | -1.303527000 | -4.645323000 | 1.667517000  | O | 4.504143000   | -0.185917000 | -0.512087000 |
| H  | -1.093675000 | 2.472930000  | 1.605232000  | C | 8.030183000   | 0.437433000  | 2.076906000  |
| H  | -3.319465000 | 1.397675000  | 1.634095000  | C | 7.841343000   | 1.170206000  | 0.743771000  |
| H  | -3.379674000 | 1.377685000  | -2.642314000 | C | 7.723433000   | 0.251637000  | -0.474820000 |
| H  | -1.150904000 | 2.475825000  | -2.668355000 | C | 7.101024000   | 0.953593000  | -1.681011000 |
| B  | -7.514755000 | -0.680152000 | -0.273932000 | C | 6.768560000   | 0.029417000  | -2.852849000 |
| F  | -8.073287000 | -1.143824000 | 0.931616000  | O | 3.351313000   | -0.873784000 | -2.696429000 |
| F  | -8.413683000 | -0.944617000 | -1.320162000 | C | 2.003943000   | -0.526227000 | -2.235547000 |

|   |             |              |              |   |             |              |              |
|---|-------------|--------------|--------------|---|-------------|--------------|--------------|
| C | 1.397246000 | 0.361392000  | -3.301474000 | H | 6.294863000 | 0.613805000  | -3.648940000 |
| C | 1.205544000 | -1.791299000 | -1.980744000 | H | 7.693187000 | -0.382262000 | -3.262619000 |
| O | 4.301870000 | -2.656540000 | -1.291371000 | H | 2.113005000 | 0.036802000  | -1.307955000 |
| C | 5.135967000 | -3.317379000 | -0.287944000 | H | 1.991292000 | 1.265701000  | -3.435578000 |
| C | 4.457041000 | -3.218617000 | 1.064907000  | H | 1.341605000 | -0.168801000 | -4.254251000 |
| C | 5.338427000 | -4.741454000 | -0.765291000 | H | 0.388335000 | 0.649335000  | -3.005573000 |
| H | 5.512252000 | 1.008361000  | 2.787082000  | H | 1.105722000 | -2.372984000 | -2.899311000 |
| H | 7.032885000 | -0.845796000 | 3.491496000  | H | 0.209796000 | -1.527281000 | -1.626426000 |
| H | 6.881814000 | -1.394611000 | 1.840285000  | H | 1.686252000 | -2.412284000 | -1.226284000 |
| H | 6.036907000 | -1.918147000 | -3.118535000 | H | 6.099732000 | -2.801799000 | -0.259925000 |
| H | 8.150795000 | 1.184655000  | 2.868953000  | H | 4.348914000 | -2.176726000 | 1.359354000  |
| H | 8.957895000 | -0.146005000 | 2.059459000  | H | 5.055451000 | -3.730313000 | 1.820752000  |
| H | 8.668385000 | 1.872374000  | 0.599939000  | H | 3.471432000 | -3.686327000 | 1.026395000  |
| H | 6.938863000 | 1.785048000  | 0.808725000  | H | 4.378135000 | -5.255197000 | -0.839565000 |
| H | 8.706867000 | -0.154553000 | -0.736999000 | H | 5.969659000 | -5.285833000 | -0.061180000 |
| H | 7.098021000 | -0.601842000 | -0.219985000 | H | 5.818108000 | -4.754841000 | -1.744538000 |
| H | 6.192064000 | 1.462505000  | -1.357133000 | H | 5.294071000 | 0.224868000  | 1.386247000  |
| H | 7.776352000 | 1.726667000  | -2.061248000 |   |             |              |              |

$E = -3417.44668$  a. u.

$H = -3416.43602$  a. u.

$G = -3416.60144$  a. u.

Transition state (IIc in 4):

|    |              |              |              |   |              |              |              |
|----|--------------|--------------|--------------|---|--------------|--------------|--------------|
| N  | 2.618806000  | 2.965823000  | 1.028165000  | H | -2.494188000 | -4.989078000 | 2.356031000  |
| C  | 1.602436000  | 2.202422000  | 0.692651000  | H | -1.016531000 | 2.363732000  | 1.912447000  |
| N  | 1.392428000  | 0.936552000  | 1.009161000  | H | -3.337035000 | 1.537806000  | 1.640504000  |
| C  | 2.357564000  | 0.409569000  | 1.789839000  | H | -2.755035000 | 1.284072000  | -2.589327000 |
| N  | 3.443705000  | 1.060031000  | 2.217262000  | H | -0.437467000 | 2.139214000  | -2.312777000 |
| C  | 3.570962000  | 2.307963000  | 1.744414000  | B | -7.387104000 | -0.242724000 | -0.790934000 |
| Cl | 4.399914000  | 3.430855000  | 2.949110000  | F | -8.154276000 | -0.625804000 | 0.324977000  |
| O  | 0.671192000  | 2.829876000  | -0.078027000 | F | -8.150852000 | -0.441913000 | -1.953658000 |
| N  | 2.204530000  | -0.878424000 | 2.173213000  | C | -4.788196000 | -0.557759000 | -0.756517000 |
| C  | 0.959703000  | -1.612740000 | 2.040296000  | C | -3.880593000 | -1.658674000 | -0.800185000 |
| C  | -0.016247000 | -1.345974000 | 3.197864000  | C | -4.661710000 | -2.797378000 | -0.936213000 |
| C  | -1.354505000 | -1.995084000 | 2.964728000  | H | -4.304676000 | -3.813471000 | -0.988460000 |
| C  | -2.527757000 | -1.240374000 | 2.929626000  | C | -6.010251000 | -2.412862000 | -0.962157000 |
| C  | -3.736314000 | -1.868628000 | 2.668256000  | C | -2.390814000 | -1.664410000 | -0.708889000 |
| C  | -3.741044000 | -3.240198000 | 2.454368000  | H | -2.040231000 | -2.682689000 | -0.544418000 |
| C  | -2.529418000 | -3.916295000 | 2.516174000  | H | -2.028149000 | -1.042566000 | 0.107708000  |
| N  | -1.361246000 | -3.319721000 | 2.762897000  | H | -1.932483000 | -1.291432000 | -1.626062000 |
| C  | -0.601260000 | 2.289005000  | -0.188784000 | C | -7.208239000 | -3.287515000 | -1.071535000 |
| C  | -1.406294000 | 2.129022000  | 0.931988000  | H | -7.796745000 | -3.030278000 | -1.953974000 |
| C  | -2.699666000 | 1.658381000  | 0.774950000  | H | -7.860593000 | -3.157212000 | -0.206195000 |
| C  | -3.195435000 | 1.342066000  | -0.489961000 | H | -6.907277000 | -4.331364000 | -1.136448000 |
| C  | -2.379008000 | 1.521903000  | -1.602833000 | C | -5.656306000 | 1.710650000  | -0.596391000 |
| C  | -1.081858000 | 2.000171000  | -1.455815000 | C | -5.707554000 | 3.136013000  | -0.520170000 |
| C  | -4.580194000 | 0.818994000  | -0.626571000 | C | -7.053286000 | 3.474359000  | -0.542356000 |
| H  | 2.893335000  | -1.218098000 | 2.824108000  | H | -7.462592000 | 4.471472000  | -0.504294000 |
| H  | 0.492714000  | -1.321055000 | 1.102811000  | C | -7.808515000 | 2.294412000  | -0.633219000 |
| H  | 1.189447000  | -2.675364000 | 1.983177000  | C | -4.584914000 | 4.119715000  | -0.444491000 |
| H  | 0.420132000  | -1.724349000 | 4.126776000  | H | -4.973303000 | 5.132549000  | -0.549134000 |
| H  | -0.141424000 | -0.268012000 | 3.308142000  | H | -3.842740000 | 3.951240000  | -1.225154000 |
| H  | -2.483053000 | -0.173329000 | 3.095357000  | H | -4.056186000 | 4.056196000  | 0.508032000  |
| H  | -4.654267000 | -1.297318000 | 2.616884000  | C | -9.288568000 | 2.157765000  | -0.687086000 |
| H  | -4.655582000 | -3.772694000 | 2.233415000  | H | -9.597219000 | 1.670784000  | -1.613785000 |

|   |              |              |              |   |             |              |              |
|---|--------------|--------------|--------------|---|-------------|--------------|--------------|
| H | -9.760052000 | 3.136607000  | -0.624862000 | H | 7.504465000 | 3.603406000  | 0.156563000  |
| H | -9.649089000 | 1.535396000  | 0.134000000  | H | 8.427403000 | 2.113886000  | 0.214737000  |
| N | -6.085282000 | -1.073525000 | -0.854753000 | H | 7.982820000 | 2.973765000  | -2.118662000 |
| N | -6.972206000 | 1.241849000  | -0.669721000 | H | 6.273375000 | 2.791957000  | -1.851188000 |
| N | 5.015328000  | 2.294213000  | 0.445500000  | H | 8.335289000 | 0.640724000  | -2.329476000 |
| C | 6.382449000  | 1.892957000  | 0.807235000  | H | 6.994908000 | 0.246755000  | -1.281564000 |
| N | 5.809628000  | -1.683575000 | -2.588127000 | H | 5.405534000 | 1.081510000  | -3.063093000 |
| P | 4.582724000  | -1.458275000 | -1.520972000 | H | 6.765591000 | 1.206886000  | -4.161618000 |
| O | 4.460160000  | -0.072278000 | -1.022059000 | H | 5.547106000 | -0.866793000 | -4.531410000 |
| C | 7.460744000  | 2.535099000  | -0.078347000 | H | 7.202069000 | -1.183309000 | -4.023016000 |
| C | 7.245997000  | 2.366134000  | -1.587032000 | H | 2.211791000 | -1.428103000 | -0.479264000 |
| C | 7.304383000  | 0.913855000  | -2.082975000 | H | 1.795372000 | 0.205895000  | -2.269809000 |
| C | 6.391384000  | 0.669367000  | -3.284799000 | H | 0.980411000 | -1.039505000 | -3.242425000 |
| C | 6.238374000  | -0.796381000 | -3.685089000 | H | 0.279344000 | -0.493708000 | -1.705376000 |
| O | 3.252859000  | -2.006352000 | -2.185855000 | H | 1.064536000 | -3.501237000 | -2.409065000 |
| C | 1.979137000  | -1.783876000 | -1.483347000 | H | 0.324221000 | -3.009969000 | -0.877422000 |
| C | 1.210525000  | -0.712316000 | -2.226315000 | H | 1.882746000 | -3.846573000 | -0.872755000 |
| C | 1.270606000  | -3.119846000 | -1.407195000 | H | 6.699295000 | -1.711855000 | 0.049839000  |
| O | 4.855303000  | -2.559973000 | -0.407543000 | H | 5.049762000 | -0.982030000 | 1.752107000  |
| C | 6.010780000  | -2.440632000 | 0.485204000  | H | 6.387126000 | -1.855063000 | 2.515730000  |
| C | 5.536510000  | -1.952168000 | 1.838611000  | H | 4.833454000 | -2.668281000 | 2.269253000  |
| C | 6.676579000  | -3.801658000 | 0.527135000  | H | 5.981608000 | -4.549693000 | 0.913185000  |
| H | 4.965442000  | 3.249658000  | 0.107165000  | H | 7.550725000 | -3.770720000 | 1.179436000  |
| H | 6.557041000  | 2.172642000  | 1.846750000  | H | 6.998873000 | -4.106615000 | -0.468977000 |
| H | 6.414677000  | 0.807172000  | 0.750388000  | H | 4.641793000 | 1.652622000  | -0.257241000 |
| H | 6.038723000  | -2.654588000 | -2.742466000 |   |             |              |              |

$E = -3417.4194$  a. u.

$H = -3416.4096$  a. u.

$G = -3416.5711$  a. u.

$f = 237.1554i$

Final complex (IIc in 4):

|    |              |              |              |   |              |              |              |
|----|--------------|--------------|--------------|---|--------------|--------------|--------------|
| N  | 2.896002000  | 2.482576000  | 0.143931000  | C | -4.579599000 | 0.800959000  | -0.722558000 |
| C  | 1.693113000  | 1.903094000  | 0.128991000  | H | 2.756879000  | -1.179112000 | 2.840009000  |
| N  | 1.344259000  | 0.816326000  | 0.782358000  | H | 0.318075000  | -1.419993000 | 1.212856000  |
| C  | 2.297787000  | 0.294071000  | 1.574296000  | H | 0.905661000  | -2.565361000 | 2.411104000  |
| N  | 3.526026000  | 0.841926000  | 1.737668000  | H | 0.170495000  | -1.090925000 | 4.246363000  |
| C  | 3.736598000  | 1.873180000  | 0.965505000  | H | -0.283445000 | 0.162613000  | 3.097928000  |
| Cl | 5.383366000  | 4.122657000  | 3.403902000  | H | -2.627157000 | 0.376308000  | 3.054353000  |
| O  | 0.800481000  | 2.523325000  | -0.659898000 | H | -4.879685000 | -0.667810000 | 2.841623000  |
| N  | 2.033131000  | -0.840861000 | 2.226475000  | H | -5.037604000 | -3.167487000 | 2.827563000  |
| C  | 0.740460000  | -1.509049000 | 2.212234000  | H | -2.942762000 | -4.485785000 | 3.028007000  |
| C  | -0.230102000 | -0.916793000 | 3.243391000  | H | -0.864304000 | 2.584209000  | 1.408387000  |
| C  | -1.610683000 | -1.512438000 | 3.141930000  | H | -3.240581000 | 1.877026000  | 1.338688000  |
| C  | -2.739644000 | -0.698646000 | 3.047392000  | H | -2.828566000 | 0.883491000  | -2.801192000 |
| C  | -3.993205000 | -1.281751000 | 2.935166000  | H | -0.454732000 | 1.619392000  | -2.733176000 |
| C  | -4.084768000 | -2.666643000 | 2.927566000  | B | -7.400648000 | -0.225676000 | -0.603498000 |
| C  | -2.910724000 | -3.401153000 | 3.032557000  | F | -8.117292000 | -0.430750000 | 0.589797000  |
| N  | -1.700040000 | -2.848612000 | 3.136037000  | F | -8.219518000 | -0.577911000 | -1.689514000 |
| C  | -0.533550000 | 2.110727000  | -0.655780000 | C | -4.805913000 | -0.576769000 | -0.636389000 |
| C  | -1.303785000 | 2.213944000  | 0.493178000  | C | -3.913001000 | -1.688367000 | -0.556580000 |
| C  | -2.628343000 | 1.809512000  | 0.450166000  | C | -4.711337000 | -2.820714000 | -0.493523000 |
| C  | -3.181560000 | 1.305651000  | -0.727025000 | H | -4.368644000 | -3.839600000 | -0.410180000 |
| C  | -2.402933000 | 1.258374000  | -1.879844000 | C | -6.055480000 | -2.420729000 | -0.516825000 |
| C  | -1.074995000 | 1.666755000  | -1.849465000 | C | -2.420115000 | -1.706308000 | -0.522164000 |



|   |              |              |              |   |             |              |              |
|---|--------------|--------------|--------------|---|-------------|--------------|--------------|
| H | -2.070008000 | -2.690832000 | -0.213318000 | C | 1.346663000 | -3.418724000 | -1.667284000 |
| H | -2.019260000 | -0.967276000 | 0.169480000  | O | 4.877368000 | -2.803298000 | -0.639328000 |
| H | -1.996765000 | -1.490465000 | -1.504167000 | C | 5.962825000 | -2.725483000 | 0.338169000  |
| C | -7.266681000 | -3.280524000 | -0.443071000 | C | 5.382776000 | -2.350172000 | 1.688567000  |
| H | -7.908154000 | -3.120623000 | -1.311151000 | C | 6.657197000 | -4.072594000 | 0.327178000  |
| H | -7.860082000 | -3.034191000 | 0.439630000  | H | 5.126278000 | 3.132871000  | 1.900655000  |
| H | -6.981459000 | -4.329781000 | -0.397880000 | H | 6.404957000 | 1.329363000  | 2.125664000  |
| C | -5.642901000 | 1.705441000  | -0.778456000 | H | 5.917506000 | 0.607911000  | 0.582063000  |
| C | -5.675014000 | 3.126357000  | -0.919355000 | H | 6.067762000 | -2.512431000 | -2.983498000 |
| C | -7.016235000 | 3.481431000  | -0.931161000 | H | 7.640939000 | 3.128123000  | 0.849789000  |
| H | -7.412669000 | 4.479898000  | -1.026293000 | H | 8.304606000 | 1.521534000  | 0.644117000  |
| C | -7.787599000 | 2.314581000  | -0.806473000 | H | 8.130776000 | 2.896460000  | -1.496974000 |
| C | -4.538236000 | 4.087892000  | -1.049535000 | H | 6.402730000 | 2.825632000  | -1.375503000 |
| H | -4.918437000 | 5.077536000  | -1.301614000 | H | 8.308248000 | 0.680243000  | -2.215976000 |
| H | -3.832790000 | 3.781204000  | -1.822174000 | H | 7.044966000 | 0.127415000  | -1.149985000 |
| H | -3.970636000 | 4.170034000  | -0.121144000 | H | 5.335623000 | 1.210088000  | -2.653260000 |
| C | -9.269823000 | 2.197000000  | -0.779003000 | H | 6.612866000 | 1.544413000  | -3.808933000 |
| H | -9.626319000 | 1.632243000  | -1.642642000 | H | 5.397703000 | -0.461735000 | -4.445023000 |
| H | -9.726700000 | 3.184648000  | -0.789135000 | H | 7.082718000 | -0.827503000 | -4.096455000 |
| H | -9.599219000 | 1.658178000  | 0.110852000  | H | 2.180851000 | -1.765013000 | -0.584757000 |
| N | -6.111229000 | -1.079057000 | -0.603152000 | H | 1.664607000 | -0.007844000 | -2.242515000 |
| N | -6.965284000 | 1.254041000  | -0.719714000 | H | 0.915977000 | -1.214756000 | -3.306790000 |
| N | 5.054837000  | 2.471768000  | 1.010094000  | H | 0.196896000 | -0.842270000 | -1.729225000 |
| C | 6.227312000  | 1.525095000  | 1.071570000  | H | 1.162247000 | -3.719696000 | -2.700232000 |
| N | 5.788007000  | -1.589745000 | -2.684795000 | H | 0.394796000 | -3.411435000 | -1.133321000 |
| P | 4.556268000  | -1.574838000 | -1.599333000 | H | 2.001960000 | -4.153233000 | -1.198867000 |
| O | 4.368761000  | -0.274262000 | -0.927082000 | H | 6.661781000 | -1.953023000 | 0.006482000  |
| C | 7.444978000  | 2.150865000  | 0.400455000  | H | 4.905008000 | -1.373185000 | 1.640800000  |
| C | 7.315711000  | 2.272733000  | -1.124899000 | H | 6.175861000 | -2.312599000 | 2.437531000  |
| C | 7.302753000  | 0.916294000  | -1.854956000 | H | 4.647229000 | -3.094810000 | 2.000193000  |
| C | 6.305044000  | 0.861446000  | -3.011041000 | H | 5.957528000 | -4.860072000 | 0.613564000  |
| C | 6.138710000  | -0.521818000 | -3.641072000 | H | 7.487337000 | -4.071765000 | 1.035186000  |
| O | 3.253939000  | -2.108170000 | -2.335705000 | H | 7.047684000 | -4.297597000 | -0.665731000 |
| C | 1.973603000  | -2.040593000 | -1.621261000 | H | 5.122019000 | 3.082290000  | 0.196185000  |
| C | 1.135421000  | -0.959551000 | -2.268182000 |   |             |              |              |

$E = -3417.475255$  a. u.

$H = -3416.464085$  a. u.

$G = -3416.629391$  a. u.
